# Supplementary material
Source: HighWire-hosted journal article supplement (https://www.annfammed.org/highwire/filestream/8353/field_highwire_adjunct_files/1/Johnson_Supp_App_B.pdf)
Supplement: Johnson_Supp_App_B.pdf [file Johnson_Supp_App_B.pdf]

## Online Supplementary Material

Lau D, Hu J, Majumdar SR, Storie DA, Rees SE, Johnson JA. Interventions to improve influenza and pneumococcal vaccination rates among community-dwelling adults: A systematic review and meta-analysis. *Ann Fam Med*. 2012;10(6):538-546.

<http://www.annfammed.org/content/10/6/538/suppl/DC1>

---

**Supplemental Appendix B.** These exhibits contain, for each intervention, a forest plot, a table showing each study's performance on the items of the Downs and Black instrument, and a table showing each study's performance on the Cochrane Risk of Bias (ROB) tool.

**Exhibit B.1 and B.2.** These exhibits contain, for each intervention, a forest plot, a table showing each study's performance on the items of the Downs and Black instrument, and a table showing each study's performance on the Cochrane Risk of Bias (ROB) tool. ROB is designed for clinical trials, and was not completed for observational studies.

*A note on study design nomenclature.* RCT = randomized controlled trial, CCT = controlled clinical trial, which includes randomized trials with inadequate means of random sequence generation, CBA = controlled before-and-after study, PCS = prospective cohort study, and RCS = retrospective cohort study. Please note that while the definition of CBA involves the assignment of interventions other than by random processes, we classified some studies involving randomized assignment as CBAs if, for example, the number of units assigned was too small to realize the benefits of randomization. RCT, CCT, and CBA designs differed from PCS and RCS designs chiefly in that, in the former, the intervention occurs as a result of deliberate investigator effort.

*Risk of bias tables.* The Risk of Bias tool has been completed for trials as a supplement to the Downs and Black items. A value of "1" represents a "yes" code (e.g.: Adequate sequence generation – 1 – yes). A value of "0" represents a "no" code (e.g.: Incomplete outcome data addressed – 0 – no). Because we applied fairly unambiguous assessment criteria, an "unclear" response was not needed. A "1" code in any column represents a source of potential bias that may lead the overall risk of bias in the study to be "unclear" or "high", instead of "low". The overall risk of bias for each study is reflected in the final column, "Free of ROB issues". In this column, a "1" code represents no ROB issues, and therefore a low risk of bias overall; while a "0" code reflects one or more ROB issues, leading to an unclear or high risk of bias. Please note that there is little empirical evidence relating the impact of methodological shortcomings, such as lack of blinding or unconcealed randomization, in quality improvement studies. An "unclear" risk or bias will be the most reasonable judgment in most cases where ROB issues are apparent.

Exhibit B.1. Forest plots and study quality – Influenza vaccinations  
 Exhibit B.1.1. Influenza vaccinations – Audit and feedback

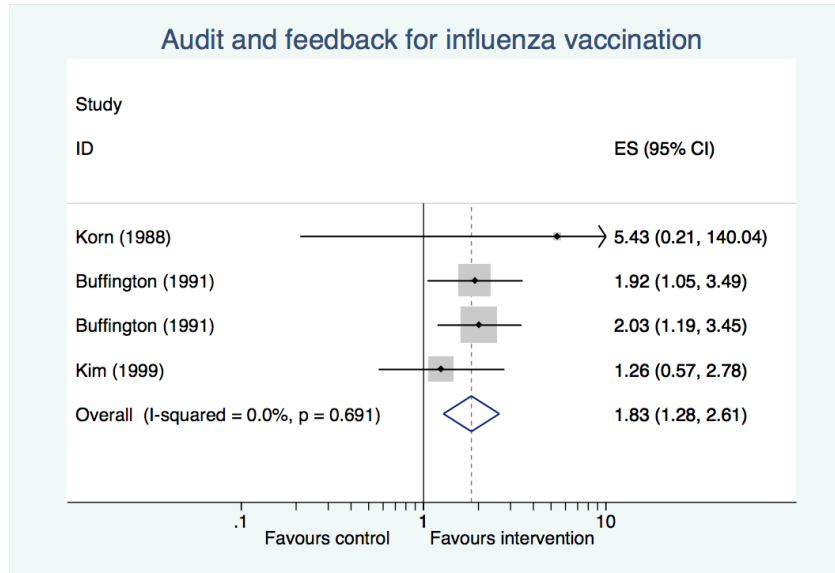

| Study ID          | Design        | Reporting                                                                                                                                                                                                                                                                                                                                                                                                                                                                                                                                                                                                                                                                                                                                                                                                                                                                                                                                                                                                                                                                                                                                                                                                                                                                                                                                                                                                                                                                                                 | External validity | Internal validity - bias | Internal validity - confounding | Summary scores                                                                                                                                                               |
|-------------------|---------------|-----------------------------------------------------------------------------------------------------------------------------------------------------------------------------------------------------------------------------------------------------------------------------------------------------------------------------------------------------------------------------------------------------------------------------------------------------------------------------------------------------------------------------------------------------------------------------------------------------------------------------------------------------------------------------------------------------------------------------------------------------------------------------------------------------------------------------------------------------------------------------------------------------------------------------------------------------------------------------------------------------------------------------------------------------------------------------------------------------------------------------------------------------------------------------------------------------------------------------------------------------------------------------------------------------------------------------------------------------------------------------------------------------------------------------------------------------------------------------------------------------------|-------------------|--------------------------|---------------------------------|------------------------------------------------------------------------------------------------------------------------------------------------------------------------------|
|                   |               | 1. Study aim clearly defined?<br>2. Main outcomes described in methods?<br>3. Patient characteristics described?<br>4. Interventions clearly described?<br>5. Distributions of principal confounders described?<br>6. Main findings described?<br>7. Estimates of random variability provided for main outcomes?<br>8. All important potential adverse events reported?<br>9. Characteristics of patients lost to follow-up described?<br>10. Actual p-values values reported?<br>11. Subjects asked to participate represented of entire population?<br>12. Subjects prepared to participate representative of entire population?<br>13. Staff, places, and facilities representative of usual treatment?<br>14. Attempt made to blind study subjects to interventions?<br>15. Attempt made to blind those measuring main outcomes?<br>16. If results were based on "data dredging", was this clear?<br>17. Analyses adjusted for different lengths of follow-up?<br>18. Statistical tests appropriate?<br>19. Compliance with intervention(s) reliable?<br>20. Main outcomes accurate (valid and reliable)?<br>21. Patients in different groups recruited from same population?<br>22. Patients in different groups recruited over the same time period?<br>23. Study subjects randomized?<br>24. Randomization assignment concealed from patients and health care staff?<br>25. Adequate adjustment for confounding?<br>26. Losses to follow-up taken into account?<br>27. Study sufficiently powered? |                   |                          |                                 |                                                                                                                                                                              |
| Buffington (1991) | rct (cluster) | 1 1 1 1 0 1 1 0 1 0                                                                                                                                                                                                                                                                                                                                                                                                                                                                                                                                                                                                                                                                                                                                                                                                                                                                                                                                                                                                                                                                                                                                                                                                                                                                                                                                                                                                                                                                                       | 1 1 1             | 0 1 1 1 0 1 1            | 1 1 1 1 9 1                     | 0 7 3 5 5 0                                                                                                                                                                  |
| Kim (1999)        | rct (cluster) | 1 1 1 1 2 1 1 0 1 1                                                                                                                                                                                                                                                                                                                                                                                                                                                                                                                                                                                                                                                                                                                                                                                                                                                                                                                                                                                                                                                                                                                                                                                                                                                                                                                                                                                                                                                                                       | 1 0 1             | 1 0 1 1 1 1 1 0          | 1 1 1 1 1 1 1                   | 0 10 2 5 6 0                                                                                                                                                                 |
| Korn (1988)       | pcs (cluster) | 1 1 1 1 1 1 1 0 1 0                                                                                                                                                                                                                                                                                                                                                                                                                                                                                                                                                                                                                                                                                                                                                                                                                                                                                                                                                                                                                                                                                                                                                                                                                                                                                                                                                                                                                                                                                       | 1 1 1             | 1 1 1 1 0 1 0            | 1 1 0 0 1 1                     | 0 8 3 5 4 0                                                                                                                                                                  |
|                   |               |                                                                                                                                                                                                                                                                                                                                                                                                                                                                                                                                                                                                                                                                                                                                                                                                                                                                                                                                                                                                                                                                                                                                                                                                                                                                                                                                                                                                                                                                                                           |                   |                          |                                 | Reporting (/11)<br>External validity (/3)<br>Internal validity - bias (7)<br>Internal validity - confounding (/6)<br>Power (/5)<br>Total Downs and Black summary score (/32) |

| Study ID          | Design        | Adequate sequence generation | Allocation concealment | Blinding (or accurate outcome assessment) | Incomplete outcome data addressed | Free of other bias (i.e.: contamination effects) | Free of ROB issues |
|-------------------|---------------|------------------------------|------------------------|-------------------------------------------|-----------------------------------|--------------------------------------------------|--------------------|
| Buffington (1991) | rct (cluster) | 1                            | 1                      | 1                                         | 1                                 | 1                                                | 1                  |
| Buffington (1991) | rct (cluster) | 1                            | 1                      | 1                                         | 1                                 | 1                                                | 1                  |
| Kim (1999)        | rct (cluster) | 1                            | 1                      | 0                                         | 1                                 | 1                                                | 0                  |
| Korn (1988)       | pcs (cluster) | NRS                          | NRS                    | 1                                         | 1                                 | 1                                                | NRS                |

Exhibit B.1.2. Influenza vaccinations – Case management

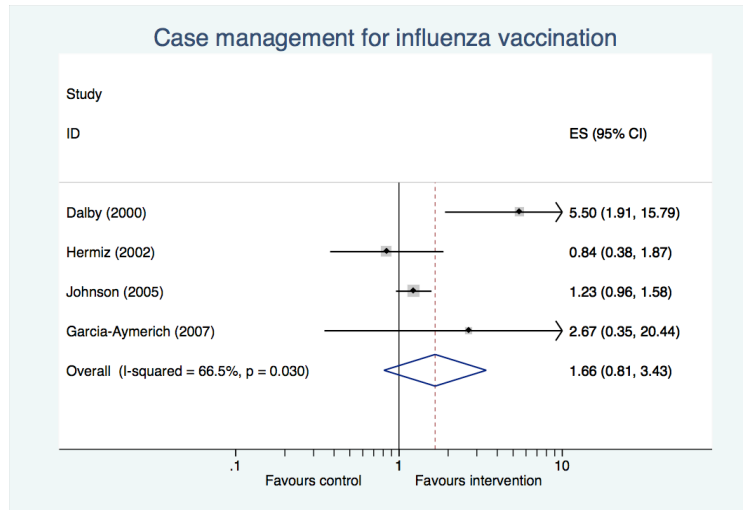

| Study ID               | Design | Reporting                                                                                                                                                                                                                                                                                                                                                                                                                                                                                                                                                                                                                                                                                                                                                                                                                                                                                                                                                                                                                                                                                                                                                                                                                                                                                                                                                                                                                                                                                                 | External validity | Internal validity - bias | Internal validity - confounding | Summary scores                                                                                                                                                                |
|------------------------|--------|-----------------------------------------------------------------------------------------------------------------------------------------------------------------------------------------------------------------------------------------------------------------------------------------------------------------------------------------------------------------------------------------------------------------------------------------------------------------------------------------------------------------------------------------------------------------------------------------------------------------------------------------------------------------------------------------------------------------------------------------------------------------------------------------------------------------------------------------------------------------------------------------------------------------------------------------------------------------------------------------------------------------------------------------------------------------------------------------------------------------------------------------------------------------------------------------------------------------------------------------------------------------------------------------------------------------------------------------------------------------------------------------------------------------------------------------------------------------------------------------------------------|-------------------|--------------------------|---------------------------------|-------------------------------------------------------------------------------------------------------------------------------------------------------------------------------|
|                        |        | 1. Study aim clearly defined?<br>2. Main outcomes described in methods?<br>3. Patient characteristics described?<br>4. Interventions clearly described?<br>5. Distributions of principal confounders described?<br>6. Main findings described?<br>7. Estimates of random variability provided for main outcomes?<br>8. All important potential adverse events reported?<br>9. Characteristics of patients lost to follow-up described?<br>10. Actual p-values values reported?<br>11. Subjects asked to participate represented of entire population?<br>12. Subjects prepared to participate representative of entire population?<br>13. Staff, places, and facilities representative of usual treatment?<br>14. Attempt made to blind study subjects to interventions?<br>15. Attempt made to blind those measuring main outcomes?<br>16. If results were based on "data dredging", was this clear?<br>17. Analyses adjusted for different lengths of follow-up?<br>18. Statistical tests appropriate?<br>19. Compliance with intervention(s) reliable?<br>20. Main outcomes accurate (valid and reliable)?<br>21. Patients in different groups recruited from same population?<br>22. Patients in different groups recruited over the same time period?<br>23. Study subjects randomized?<br>24. Randomization assignment concealed from patients and health care staff?<br>25. Adequate adjustment for confounding?<br>26. Losses to follow-up taken into account?<br>27. Study sufficiently powered? |                   |                          |                                 |                                                                                                                                                                               |
| Dalby (2000)           | rct    | 1 1 1 1 1 1 1 1 0 0 1                                                                                                                                                                                                                                                                                                                                                                                                                                                                                                                                                                                                                                                                                                                                                                                                                                                                                                                                                                                                                                                                                                                                                                                                                                                                                                                                                                                                                                                                                     | 1 0 1             | 0 1 1 1 1 1 1 0          | 1 1 1 1 1 0                     | 8 2 5 5 0                                                                                                                                                                     |
| Garcia-Aymerich (2007) | rct    | 1 1 1 1 2 1 1 0 1 1                                                                                                                                                                                                                                                                                                                                                                                                                                                                                                                                                                                                                                                                                                                                                                                                                                                                                                                                                                                                                                                                                                                                                                                                                                                                                                                                                                                                                                                                                       | 1 1 1             | 0 1 1 1 1 1 0            | 1 1 1 1 1 0                     | 10 3 5 5 0                                                                                                                                                                    |
| Hermiz (2002)          | cct    | 1 1 1 1 1 1 1 0 1 1                                                                                                                                                                                                                                                                                                                                                                                                                                                                                                                                                                                                                                                                                                                                                                                                                                                                                                                                                                                                                                                                                                                                                                                                                                                                                                                                                                                                                                                                                       | 1 0 1             | 0 0 1 1 1 1 0            | 1 1 1 0 1 1                     | 9 2 4 5 0                                                                                                                                                                     |
| Johnson (2005)         | rct    | 1 1 1 1 2 1 1 0 1 1                                                                                                                                                                                                                                                                                                                                                                                                                                                                                                                                                                                                                                                                                                                                                                                                                                                                                                                                                                                                                                                                                                                                                                                                                                                                                                                                                                                                                                                                                       | 0 0 1             | 0 1 1 1 1 1 1            | 1 1 0 0 1 1                     | 10 1 6 4 0                                                                                                                                                                    |
|                        |        |                                                                                                                                                                                                                                                                                                                                                                                                                                                                                                                                                                                                                                                                                                                                                                                                                                                                                                                                                                                                                                                                                                                                                                                                                                                                                                                                                                                                                                                                                                           |                   |                          |                                 | Reporting (/11)<br>External validity (/3)<br>Internal validity - bias (/7)<br>Internal validity - confounding (/6)<br>Power (/5)<br>Total Downs and Black summary score (/32) |

| Study ID               | Design | Adequate sequence generation | Allocation concealment | Blinding (or accurate outcome assessment) | Incomplete outcome data addressed | Free of other bias (i.e.: contamination effects) | Free of ROB issues |
|------------------------|--------|------------------------------|------------------------|-------------------------------------------|-----------------------------------|--------------------------------------------------|--------------------|
| Dalby (2000)           | rct    | 1                            | 1                      | 1                                         | 0                                 | 0                                                | 0                  |
| Garcia-Aymerich (2007) | rct    | 1                            | 1                      | 1                                         | 0                                 | 0                                                | 0                  |
| Hermiz (2002)          | cct    | 1                            | 0                      | 0                                         | 1                                 | 0                                                | 0                  |
| Johnson (2005)         | rct    | NRS                          | NRS                    | 1                                         | 1                                 | 0                                                | NRS                |

Exhibit B.1.3. Influenza vaccinations – Clinician education

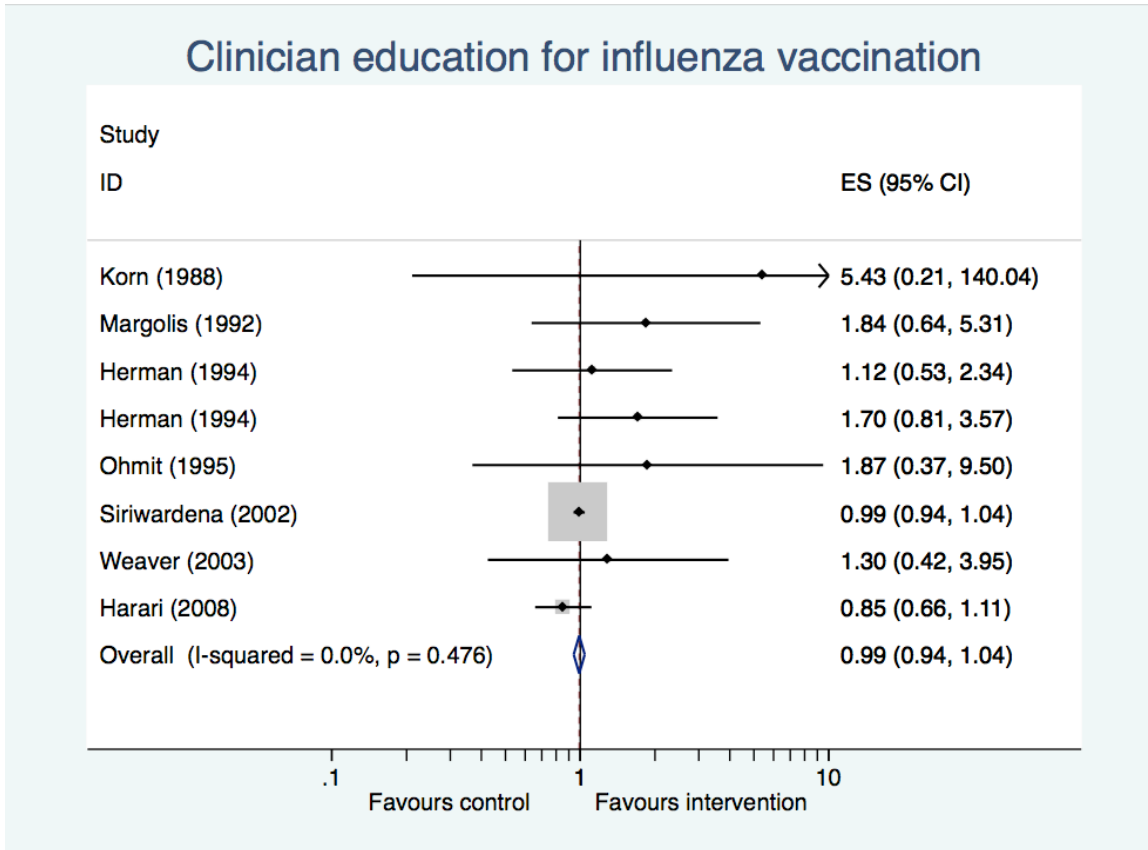

Exhibit B.1.3. Influenza vaccinations – Clinician education (continued)

| Study ID           | Design        | Reporting                     |                                        |                                       |                                     |                                                      |                             |                                                                |                                                     |                                                             |                                      | External validity                                                   | Internal validity - bias                                                  |                                                                      |                                                            |                                                          |                                                               | Internal validity - confounding                           |                                    |                                               |                                                  |                                                                  | Summary scores                                                        |                                |                                                                             |                                          |                                             |                                 |                 |                        |                               |                                      |            |                                           |
|--------------------|---------------|-------------------------------|----------------------------------------|---------------------------------------|-------------------------------------|------------------------------------------------------|-----------------------------|----------------------------------------------------------------|-----------------------------------------------------|-------------------------------------------------------------|--------------------------------------|---------------------------------------------------------------------|---------------------------------------------------------------------------|----------------------------------------------------------------------|------------------------------------------------------------|----------------------------------------------------------|---------------------------------------------------------------|-----------------------------------------------------------|------------------------------------|-----------------------------------------------|--------------------------------------------------|------------------------------------------------------------------|-----------------------------------------------------------------------|--------------------------------|-----------------------------------------------------------------------------|------------------------------------------|---------------------------------------------|---------------------------------|-----------------|------------------------|-------------------------------|--------------------------------------|------------|-------------------------------------------|
|                    |               | 1. Study aim clearly defined? | 2. Main outcomes described in methods? | 3. Patient characteristics described? | 4. Interventions clearly described? | 5. Distributions of principal confounders described? | 6. Main findings described? | 7. Estimates of random variability provided for main outcomes? | 8. All important potential adverse events reported? | 9. Characteristics of patients lost to follow-up described? | 10. Actual p-values values reported? | 11. Subjects asked to participate represented of entire population? | 12. Subjects prepared to participate representative of entire population? | 13. Staff, places, and facilities representative of usual treatment? | 14. Attempt made to blind study subjects to interventions? | 15. Attempt made to blind those measuring main outcomes? | 16. If results were based on "data dredging", was this clear? | 17. Analyses adjusted for different lengths of follow-up? | 18. Statistical tests appropriate? | 19. Compliance with intervention(s) reliable? | 20. Main outcomes accurate (valid and reliable)? | 21. Patients in different groups recruited from same population? | 22. Patients in different groups recruited over the same time period? | 23. Study subjects randomized? | 24. Randomization assignment concealed from patients and health care staff? | 25. Adequate adjustment for confounding? | 26. Losses to follow-up taken into account? | 27. Study sufficiently powered? | Reporting (/11) | External validity (/3) | Internal validity - bias (/7) | Internal validity - confounding (/6) | Power (/5) | Total Downs and Black summary score (/32) |
| Harari (2008)      | rct           | 1                             | 1                                      | 1                                     | 1                                   | 2                                                    | 1                           | 1                                                              | 0                                                   | 0                                                           | 1                                    | 1                                                                   | 1                                                                         | 1                                                                    | 0                                                          | 0                                                        | 1                                                             | 1                                                         | 1                                  | 1                                             | 0                                                | 1                                                                | 1                                                                     | 1                              | 1                                                                           | 1                                        | 0                                           | 0                               | 9               | 3                      | 4                             | 4                                    | 0          | 20                                        |
| Herman (1994)      | rct (cluster) | 1                             | 1                                      | 1                                     | 1                                   | 2                                                    | 1                           | 1                                                              | 0                                                   | 1                                                           | 1                                    | 1                                                                   | 1                                                                         | 1                                                                    | 0                                                          | 0                                                        | 1                                                             | 1                                                         | 1                                  | 1                                             | 1                                                | 1                                                                | 1                                                                     | 1                              | 1                                                                           | 1                                        | 1                                           | 0                               | 10              | 3                      | 5                             | 6                                    | 0          | 24                                        |
| Korn (1988)        | pcs (cluster) | 1                             | 1                                      | 1                                     | 1                                   | 1                                                    | 1                           | 1                                                              | 0                                                   | 1                                                           | 0                                    | 1                                                                   | 1                                                                         | 1                                                                    | 1                                                          | 1                                                        | 1                                                             | 1                                                         | 0                                  | 1                                             | 0                                                | 1                                                                | 1                                                                     | 0                              | 0                                                                           | 1                                        | 1                                           | 0                               | 8               | 3                      | 5                             | 4                                    | 0          | 20                                        |
| Margolis (1992)    | cba (cluster) | 1                             | 1                                      | 1                                     | 1                                   | 0                                                    | 1                           | 1                                                              | 0                                                   | 1                                                           | 0                                    | 1                                                                   | 1                                                                         | 1                                                                    | 0                                                          | 1                                                        | 1                                                             | 1                                                         | 1                                  | 1                                             | 1                                                | 1                                                                | 1                                                                     | 0                              | 0                                                                           | 9                                        | 1                                           | 0                               | 7               | 3                      | 6                             | 3                                    | 0          | 19                                        |
| Ohmit (1995)       | rct (cluster) | 1                             | 1                                      | 1                                     | 1                                   | 0                                                    | 1                           | 1                                                              | 0                                                   | 1                                                           | 1                                    | 0                                                                   | 0                                                                         | 1                                                                    | 0                                                          | 1                                                        | 1                                                             | 1                                                         | 0                                  | 1                                             | 0                                                | 0                                                                | 1                                                                     | 1                              | 1                                                                           | 1                                        | 1                                           | 0                               | 8               | 1                      | 4                             | 5                                    | 0          | 18                                        |
| Siriwardena (2002) | rct (cluster) | 1                             | 1                                      | 1                                     | 1                                   | 2                                                    | 1                           | 1                                                              | 0                                                   | 1                                                           | 1                                    | 1                                                                   | 1                                                                         | 1                                                                    | 1                                                          | 0                                                        | 1                                                             | 1                                                         | 1                                  | 1                                             | 0                                                | 1                                                                | 1                                                                     | 1                              | 1                                                                           | 1                                        | 1                                           | 2                               | 10              | 3                      | 5                             | 6                                    | 2          | 26                                        |
| Weaver (2003)      | cba (cluster) | 1                             | 1                                      | 1                                     | 1                                   | 2                                                    | 1                           | 1                                                              | 0                                                   | 1                                                           | 1                                    | 1                                                                   | 1                                                                         | 1                                                                    | 0                                                          | 0                                                        | 1                                                             | 1                                                         | 0                                  | 1                                             | 1                                                | 0                                                                | 1                                                                     | 0                              | 0                                                                           | 0                                        | 0                                           | 0                               | 10              | 3                      | 4                             | 1                                    | 0          | 18                                        |

| Study ID           | Design        | Adequate sequence generation | Allocation concealment | Blinding (or accurate outcome assessment) | Incomplete outcome data addressed | Free of other bias (i.e.: contamination effects) | Free of ROB issues |
|--------------------|---------------|------------------------------|------------------------|-------------------------------------------|-----------------------------------|--------------------------------------------------|--------------------|
| Harari (2008)      | rct           | 1                            | 1                      | 0                                         | 0                                 | 0                                                | 0                  |
| Herman (1994)      | rct (cluster) | 1                            | 1                      | 1                                         | 1                                 | 1                                                | 1                  |
| Herman (1994)      | rct (cluster) | 1                            | 1                      | 1                                         | 1                                 | 1                                                | 1                  |
| Korn (1988)        | pcs (cluster) | NRS                          | NRS                    | 1                                         | 1                                 | 1                                                | NRS                |
| Margolis (1992)    | cba (cluster) | NRS                          | NRS                    | 1                                         | 1                                 | 1                                                | NRS                |
| Ohmit (1995)       | rct (cluster) | 0                            | 1                      | 1                                         | 1                                 | 1                                                | 0                  |
| Siriwardena (2002) | rct (cluster) | 1                            | 1                      | 0                                         | 1                                 | 1                                                | 0                  |
| Weaver (2003)      | cba (cluster) | NRS                          | NRS                    | 1                                         | 0                                 | 1                                                | NRS                |

Exhibit B.1.4. Influenza vaccinations – Clinician reminders

## Clinician reminders for influenza vaccination

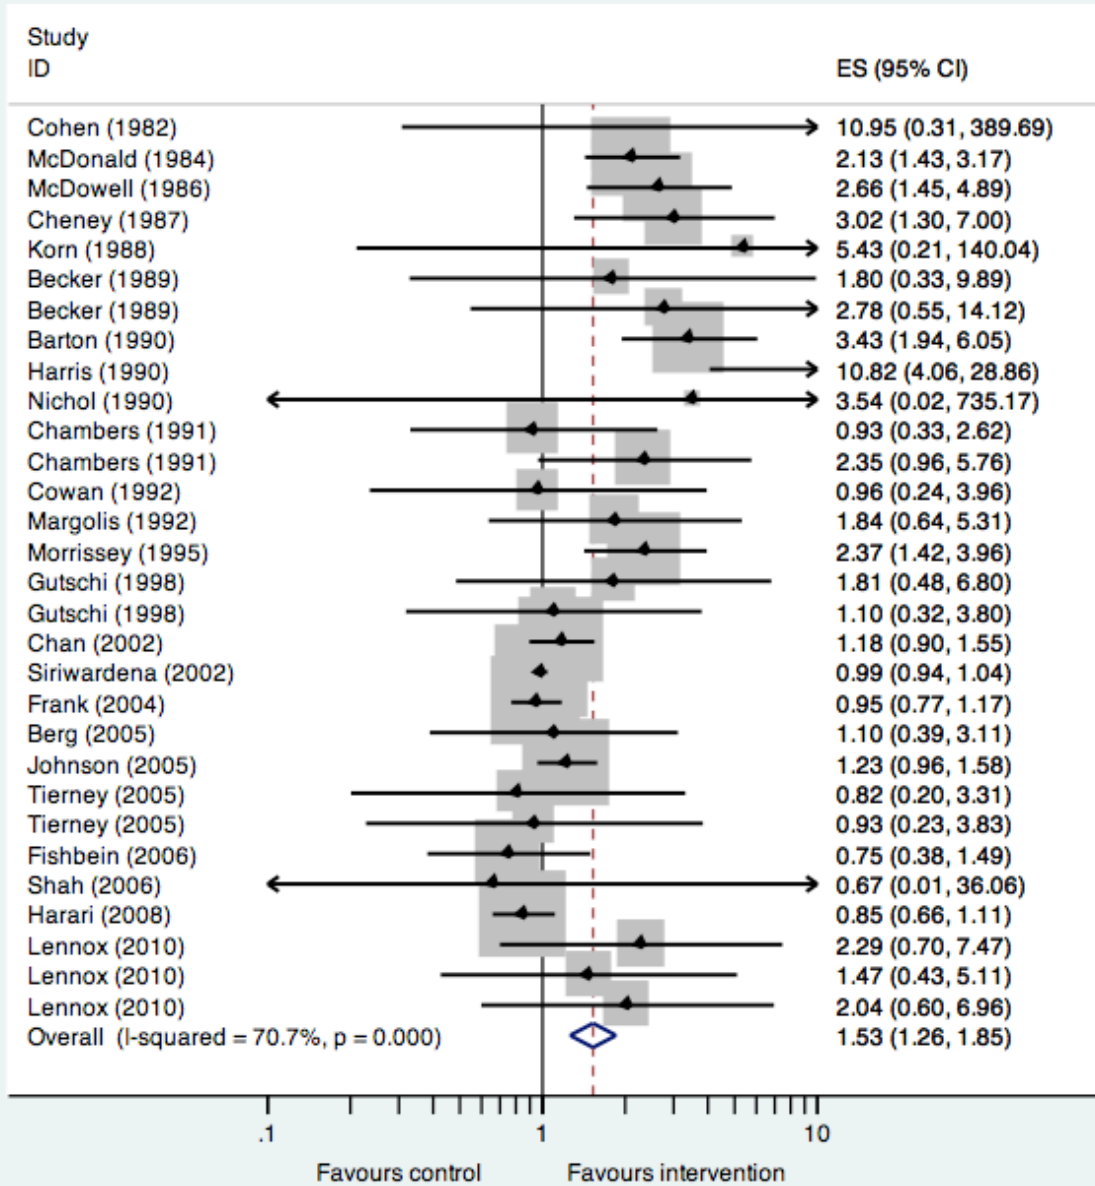

Exhibit B.1.4. Influenza vaccinations – Clinician reminders (continued)

| Study ID           | Design        | Reporting                                                                                                                                                                                                                                                                                                                                                                                                                                                                                                                                                                                                                                                                                                                                                                                                                                                                                                                                                                                                                                                                                                     | External validity                                                                                                                                                                                                                                                                                                                                                                                                                                                                                                                                                                                                           | Internal validity - bias                                                                                                                                                                                                                                                                                                                                                                 | Internal validity - confounding                                                                                                  | Summary scores |
|--------------------|---------------|---------------------------------------------------------------------------------------------------------------------------------------------------------------------------------------------------------------------------------------------------------------------------------------------------------------------------------------------------------------------------------------------------------------------------------------------------------------------------------------------------------------------------------------------------------------------------------------------------------------------------------------------------------------------------------------------------------------------------------------------------------------------------------------------------------------------------------------------------------------------------------------------------------------------------------------------------------------------------------------------------------------------------------------------------------------------------------------------------------------|-----------------------------------------------------------------------------------------------------------------------------------------------------------------------------------------------------------------------------------------------------------------------------------------------------------------------------------------------------------------------------------------------------------------------------------------------------------------------------------------------------------------------------------------------------------------------------------------------------------------------------|------------------------------------------------------------------------------------------------------------------------------------------------------------------------------------------------------------------------------------------------------------------------------------------------------------------------------------------------------------------------------------------|----------------------------------------------------------------------------------------------------------------------------------|----------------|
|                    |               | 1. Study aim clearly defined?<br>2. Main outcomes described in methods?<br>3. Patient characteristics described?<br>4. Interventions clearly described?<br>5. Distributions of principal confounders described?<br>6. Main findings described?<br>7. Estimates of random variability provided for main outcomes?<br>8. All important potential adverse events reported?<br>9. Characteristics of patients lost to follow-up described?<br>10. Actual p-values values reported?<br>11. Subjects asked to participate represented of entire population?<br>12. Subjects prepared to participate representative of entire population?<br>13. Staff, places, and facilities representative of usual treatment?<br>14. Attempt made to blind study subjects to interventions?<br>15. Attempt made to blind those measuring main outcomes?<br>16. If results were based on "data dredging", was this clear?<br>17. Analyses adjusted for different lengths of follow-up?<br>18. Statistical tests appropriate?<br>19. Compliance with intervention(s) reliable?<br>20. Main outcomes accurate (valid and reliable)? | 11. Subjects asked to participate represented of entire population?<br>12. Subjects prepared to participate representative of entire population?<br>13. Staff, places, and facilities representative of usual treatment?<br>14. Attempt made to blind study subjects to interventions?<br>15. Attempt made to blind those measuring main outcomes?<br>16. If results were based on "data dredging", was this clear?<br>17. Analyses adjusted for different lengths of follow-up?<br>18. Statistical tests appropriate?<br>19. Compliance with intervention(s) reliable?<br>20. Main outcomes accurate (valid and reliable)? | 21. Patients in different groups recruited from same population?<br>22. Patients in different groups recruited over the same time period?<br>23. Study subjects randomized?<br>24. Randomization assignment concealed from patients and health care staff?<br>25. Adequate adjustment for confounding?<br>26. Losses to follow-up taken into account?<br>27. Study sufficiently powered? | Reporting (/11)<br>External validity (/3)<br>Internal validity - bias (/7)<br>Internal validity - confounding (/6)<br>Power (/5) |                |
| Barton (1990)      | rct           | 1 1 1 1 0 1 1 0 1 1                                                                                                                                                                                                                                                                                                                                                                                                                                                                                                                                                                                                                                                                                                                                                                                                                                                                                                                                                                                                                                                                                           | 1 1 1 1                                                                                                                                                                                                                                                                                                                                                                                                                                                                                                                                                                                                                     | 0 1 1 1 1 1 1 1                                                                                                                                                                                                                                                                                                                                                                          | 0 1 0 0 9 1                                                                                                                      | 8 3 6 2 0 19   |
| Becker (1989)      | cct           | 1 1 1 1 1 1 1 0 1 1                                                                                                                                                                                                                                                                                                                                                                                                                                                                                                                                                                                                                                                                                                                                                                                                                                                                                                                                                                                                                                                                                           | 1 0 1 1                                                                                                                                                                                                                                                                                                                                                                                                                                                                                                                                                                                                                     | 0 0 1 1 1 1 1 0                                                                                                                                                                                                                                                                                                                                                                          | 1 1 1 0 1 0                                                                                                                      | 9 2 4 4 0 19   |
| Berg (2005)        | rct           | 1 1 1 1 2 1 1 0 1 1                                                                                                                                                                                                                                                                                                                                                                                                                                                                                                                                                                                                                                                                                                                                                                                                                                                                                                                                                                                                                                                                                           | 1 1 1 1                                                                                                                                                                                                                                                                                                                                                                                                                                                                                                                                                                                                                     | 0 1 1 1 1 1 1 1                                                                                                                                                                                                                                                                                                                                                                          | 1 1 0 0 1 1                                                                                                                      | 10 3 5 4 0 22  |
| Chambers (1991)    | rct (cluster) | 1 1 1 1 1 1 0 0 1 1                                                                                                                                                                                                                                                                                                                                                                                                                                                                                                                                                                                                                                                                                                                                                                                                                                                                                                                                                                                                                                                                                           | 1 1 1 1                                                                                                                                                                                                                                                                                                                                                                                                                                                                                                                                                                                                                     | 1 1 1 1 0 1 1 1                                                                                                                                                                                                                                                                                                                                                                          | 1 1 1 1 9 1                                                                                                                      | 8 3 6 5 0 22   |
| Chan (2002)        | rct (cluster) | 1 1 1 1 1 1 1 0 1 1                                                                                                                                                                                                                                                                                                                                                                                                                                                                                                                                                                                                                                                                                                                                                                                                                                                                                                                                                                                                                                                                                           | 1 1 1 1                                                                                                                                                                                                                                                                                                                                                                                                                                                                                                                                                                                                                     | 1 1 1 1 1 1 1 1                                                                                                                                                                                                                                                                                                                                                                          | 1 1 1 1 1 1                                                                                                                      | 9 3 7 6 0 25   |
| Cheney (1987)      | rct           | 1 1 1 1 0 1 1 0 1 0                                                                                                                                                                                                                                                                                                                                                                                                                                                                                                                                                                                                                                                                                                                                                                                                                                                                                                                                                                                                                                                                                           | 1 1 1 1                                                                                                                                                                                                                                                                                                                                                                                                                                                                                                                                                                                                                     | 1 0 1 1 1 1 1 0                                                                                                                                                                                                                                                                                                                                                                          | 1 1 1 1 9 1                                                                                                                      | 7 3 5 5 0 20   |
| Cohen (1982)       | rct (cluster) | 1 1 1 1 0 1 1 0 1 1                                                                                                                                                                                                                                                                                                                                                                                                                                                                                                                                                                                                                                                                                                                                                                                                                                                                                                                                                                                                                                                                                           | 1 1 1 1                                                                                                                                                                                                                                                                                                                                                                                                                                                                                                                                                                                                                     | 1 0 1 1 1 1 1 0                                                                                                                                                                                                                                                                                                                                                                          | 1 1 1 1 9 1                                                                                                                      | 8 3 5 5 0 21   |
| Cowan (1992)       | rct (cluster) | 1 1 1 1 1 1 1 0 1 0                                                                                                                                                                                                                                                                                                                                                                                                                                                                                                                                                                                                                                                                                                                                                                                                                                                                                                                                                                                                                                                                                           | 1 1 1 1                                                                                                                                                                                                                                                                                                                                                                                                                                                                                                                                                                                                                     | 1 1 1 1 0 1 1 1                                                                                                                                                                                                                                                                                                                                                                          | 1 1 0 0 9 1                                                                                                                      | 9 3 6 3 4 25   |
| Fishbein (2006)    | cba           | 1 1 1 1 1 1 1 0 1 0                                                                                                                                                                                                                                                                                                                                                                                                                                                                                                                                                                                                                                                                                                                                                                                                                                                                                                                                                                                                                                                                                           | 1 1 1 1                                                                                                                                                                                                                                                                                                                                                                                                                                                                                                                                                                                                                     | 0 0 1 1 1 1 1 0                                                                                                                                                                                                                                                                                                                                                                          | 1 1 0 0 9 1                                                                                                                      | 8 3 4 3 0 18   |
| Frank (2004)       | cct           | 1 1 1 1 1 1 1 0 1 1                                                                                                                                                                                                                                                                                                                                                                                                                                                                                                                                                                                                                                                                                                                                                                                                                                                                                                                                                                                                                                                                                           | 1 1 1 1                                                                                                                                                                                                                                                                                                                                                                                                                                                                                                                                                                                                                     | 1 1 1 1 1 1 1 1                                                                                                                                                                                                                                                                                                                                                                          | 1 1 1 0 9 1                                                                                                                      | 9 3 7 4 0 23   |
| Gutsch (1998)      | cct           | 1 1 1 1 2 1 1 0 1 1                                                                                                                                                                                                                                                                                                                                                                                                                                                                                                                                                                                                                                                                                                                                                                                                                                                                                                                                                                                                                                                                                           | 1 1 1 1                                                                                                                                                                                                                                                                                                                                                                                                                                                                                                                                                                                                                     | 0 0 1 1 1 1 1 0                                                                                                                                                                                                                                                                                                                                                                          | 1 1 1 0 0 1                                                                                                                      | 10 3 3 4 0 20  |
| Harari (2008)      | rct           | 1 1 1 1 2 1 1 0 0 1                                                                                                                                                                                                                                                                                                                                                                                                                                                                                                                                                                                                                                                                                                                                                                                                                                                                                                                                                                                                                                                                                           | 1 1 1 1                                                                                                                                                                                                                                                                                                                                                                                                                                                                                                                                                                                                                     | 0 0 1 1 1 1 1 0                                                                                                                                                                                                                                                                                                                                                                          | 1 1 1 1 1 0                                                                                                                      | 9 3 4 4 0 20   |
| Harris (1990)      | rct           | 1 1 1 1 0 1 0 0 1 0                                                                                                                                                                                                                                                                                                                                                                                                                                                                                                                                                                                                                                                                                                                                                                                                                                                                                                                                                                                                                                                                                           | 0 0 1 1                                                                                                                                                                                                                                                                                                                                                                                                                                                                                                                                                                                                                     | 0 0 1 1 1 1 1 1                                                                                                                                                                                                                                                                                                                                                                          | 0 1 0 0 9 1                                                                                                                      | 6 1 5 2 0 14   |
| Johnson (2005)     | rct           | 1 1 1 1 2 1 1 0 1 1                                                                                                                                                                                                                                                                                                                                                                                                                                                                                                                                                                                                                                                                                                                                                                                                                                                                                                                                                                                                                                                                                           | 0 0 1 1                                                                                                                                                                                                                                                                                                                                                                                                                                                                                                                                                                                                                     | 0 1 1 1 1 1 1 1                                                                                                                                                                                                                                                                                                                                                                          | 1 1 0 0 1 1                                                                                                                      | 10 1 6 4 0 21  |
| Korn (1988)        | pcs (cluster) | 1 1 1 1 1 1 1 0 1 0                                                                                                                                                                                                                                                                                                                                                                                                                                                                                                                                                                                                                                                                                                                                                                                                                                                                                                                                                                                                                                                                                           | 1 1 1 1                                                                                                                                                                                                                                                                                                                                                                                                                                                                                                                                                                                                                     | 1 1 1 1 0 1 0 1                                                                                                                                                                                                                                                                                                                                                                          | 1 1 0 0 1 1                                                                                                                      | 8 3 5 4 0 20   |
| Lennox (2010)      | rct (cluster) | 1 0 1 1 2 1 1 1 1 1                                                                                                                                                                                                                                                                                                                                                                                                                                                                                                                                                                                                                                                                                                                                                                                                                                                                                                                                                                                                                                                                                           | 1 0 1 1                                                                                                                                                                                                                                                                                                                                                                                                                                                                                                                                                                                                                     | 0 1 1 1 1 1 1 1                                                                                                                                                                                                                                                                                                                                                                          | 1 1 1 1 1 1                                                                                                                      | 10 2 6 6 0 24  |
| Margolis (1992)    | cba (cluster) | 1 1 1 1 0 1 1 0 1 0                                                                                                                                                                                                                                                                                                                                                                                                                                                                                                                                                                                                                                                                                                                                                                                                                                                                                                                                                                                                                                                                                           | 1 1 1 1                                                                                                                                                                                                                                                                                                                                                                                                                                                                                                                                                                                                                     | 0 1 1 1 1 1 1 1                                                                                                                                                                                                                                                                                                                                                                          | 1 1 0 0 9 1                                                                                                                      | 7 3 6 3 0 19   |
| McDonald (1984)    | rct (cluster) | 1 1 1 1 0 1 1 0 1 1                                                                                                                                                                                                                                                                                                                                                                                                                                                                                                                                                                                                                                                                                                                                                                                                                                                                                                                                                                                                                                                                                           | 1 1 1 1                                                                                                                                                                                                                                                                                                                                                                                                                                                                                                                                                                                                                     | 1 1 1 1 1 1 1 1                                                                                                                                                                                                                                                                                                                                                                          | 1 1 1 1 9 1                                                                                                                      | 8 3 7 5 0 23   |
| McDowell (1986)    | cct           | 1 1 1 1 0 1 1 0 1 0                                                                                                                                                                                                                                                                                                                                                                                                                                                                                                                                                                                                                                                                                                                                                                                                                                                                                                                                                                                                                                                                                           | 1 1 1 1                                                                                                                                                                                                                                                                                                                                                                                                                                                                                                                                                                                                                     | 0 1 1 1 1 1 1 1                                                                                                                                                                                                                                                                                                                                                                          | 1 1 1 0 1 1                                                                                                                      | 7 3 6 5 1 22   |
| Morrissey (1995)   | rct           | 1 1 1 1 2 1 1 0 1 1                                                                                                                                                                                                                                                                                                                                                                                                                                                                                                                                                                                                                                                                                                                                                                                                                                                                                                                                                                                                                                                                                           | 1 0 1 1                                                                                                                                                                                                                                                                                                                                                                                                                                                                                                                                                                                                                     | 0 1 1 1 1 1 1 0                                                                                                                                                                                                                                                                                                                                                                          | 1 1 1 1 1 1                                                                                                                      | 10 2 5 6 0 23  |
| Nichol (1990)      | pcs (cluster) | 1 1 1 1 1 1 1 0 0 0                                                                                                                                                                                                                                                                                                                                                                                                                                                                                                                                                                                                                                                                                                                                                                                                                                                                                                                                                                                                                                                                                           | 1 1 1 1                                                                                                                                                                                                                                                                                                                                                                                                                                                                                                                                                                                                                     | 0 1 1 1 1 1 1 1                                                                                                                                                                                                                                                                                                                                                                          | 0 1 0 0 9 0                                                                                                                      | 7 3 6 1 0 17   |
| Shah (2006)        | pcs (cluster) | 1 1 1 1 2 1 1 0 0 1                                                                                                                                                                                                                                                                                                                                                                                                                                                                                                                                                                                                                                                                                                                                                                                                                                                                                                                                                                                                                                                                                           | 1 1 1 1                                                                                                                                                                                                                                                                                                                                                                                                                                                                                                                                                                                                                     | 0 0 1 1 1 1 1 0                                                                                                                                                                                                                                                                                                                                                                          | 0 1 0 0 1 0                                                                                                                      | 10 3 4 4 0 21  |
| Siriwardena (2002) | rct (cluster) | 1 1 1 1 2 1 1 0 1 1                                                                                                                                                                                                                                                                                                                                                                                                                                                                                                                                                                                                                                                                                                                                                                                                                                                                                                                                                                                                                                                                                           | 1 1 1 1                                                                                                                                                                                                                                                                                                                                                                                                                                                                                                                                                                                                                     | 1 0 1 1 1 1 1 0                                                                                                                                                                                                                                                                                                                                                                          | 1 1 1 1 1 1                                                                                                                      | 10 3 5 6 2 26  |
| Tierney (2005)     | rct (cluster) | 1 1 1 1 1 1 0 0 1 0                                                                                                                                                                                                                                                                                                                                                                                                                                                                                                                                                                                                                                                                                                                                                                                                                                                                                                                                                                                                                                                                                           | 1 0 1 1                                                                                                                                                                                                                                                                                                                                                                                                                                                                                                                                                                                                                     | 1 1 1 1 1 1 1 1                                                                                                                                                                                                                                                                                                                                                                          | 1 1 1 1 1 1                                                                                                                      | 7 2 7 6 0 22   |

Total Downs and Black summary score (/32)

Exhibit B.1.4. Influenza vaccinations – Clinician reminders (continued)

| Study ID           | Design        | Adequate sequence generation | Allocation concealment | Blinding (or accurate outcome assessment) | Incomplete outcome data addressed | Free of other bias (i.e.: contamination effects) | Free of ROB issues |
|--------------------|---------------|------------------------------|------------------------|-------------------------------------------|-----------------------------------|--------------------------------------------------|--------------------|
| Barton (1990)      | rct           | NRS                          | NRS                    | 1                                         | 1                                 | 0                                                | NRS                |
| Becker (1989)      | cct           | 1                            | 0                      | 0                                         | 0                                 | 0                                                | 0                  |
| Berg (2005)        | rct           | NRS                          | NRS                    | 1                                         | 1                                 | 0                                                |                    |
| Chambers (1991)    | rct (cluster) | 1                            | 1                      | 1                                         | 1                                 | 1                                                | 1                  |
| Chan (2002)        | rct (cluster) | 1                            | 1                      | 1                                         | 1                                 | 1                                                | 1                  |
| Cheney (1987)      | rct           | 1                            | 1                      | 0                                         | 1                                 | 0                                                | 0                  |
| Cohen (1982)       | rct (cluster) | 1                            | 1                      | 0                                         | 1                                 | 1                                                | 0                  |
| Cowan (1992)       | rct (cluster) | 1                            | 0                      | 1                                         | 1                                 | 1                                                | 0                  |
| Fishbein (2006)    | cba           | NRS                          | 0                      | 0                                         | 1                                 | 0                                                | NRS                |
| Frank (2004)       | cct           | 1                            | 0                      | 1                                         | 1                                 | 0                                                | 0                  |
| Gutschi (1998)     | cct           | 1                            | 0                      | 0                                         | 1                                 | 0                                                | 0                  |
| Harari (2008)      | rct           | 1                            | 1                      | 0                                         | 0                                 | 0                                                | 0                  |
| Harris (1990)      | rct           | NRS                          | NRS                    | 1                                         | 1                                 | 0                                                | NRS                |
| Johnson (2005)     | rct           | NRS                          | NRS                    | 1                                         | 1                                 | 0                                                | NRS                |
| Korn (1988)        | pcs (cluster) | NRS                          | NRS                    | 1                                         | 1                                 | 1                                                | NRS                |
| Lennox (2010)      | rct (cluster) | 1                            | 1                      | 1                                         | 1                                 | 1                                                | 1                  |
| Margolis (1992)    | cba (cluster) | NRS                          | NRS                    | 1                                         | 1                                 | 1                                                | NRS                |
| McDonald (1984)    | rct (cluster) | 1                            | 1                      | 1                                         | 1                                 | 1                                                | 1                  |
| McDowell (1986)    | cct           | 1                            | 0                      | 1                                         | 1                                 | 0                                                | 0                  |
| Morrissey (1995)   | rct           | 1                            | 1                      | 1                                         | 1                                 | 0                                                | 0                  |
| Nichol (1990)      | pcs (cluster) | NRS                          | NRS                    | 1                                         | 0                                 | 1                                                | NRS                |
| Shah (2006)        | pcs (cluster) | NRS                          | NRS                    | 0                                         | 0                                 | 1                                                | NRS                |
| Siriwardena (2002) | rct (cluster) | 1                            | 1                      | 0                                         | 1                                 | 1                                                | 0                  |
| Tierney (2005)     | rct (cluster) | 1                            | 1                      | 1                                         | 1                                 | 1                                                | 1                  |



Exhibit B.1.5. Influenza vaccinations – Community engagement

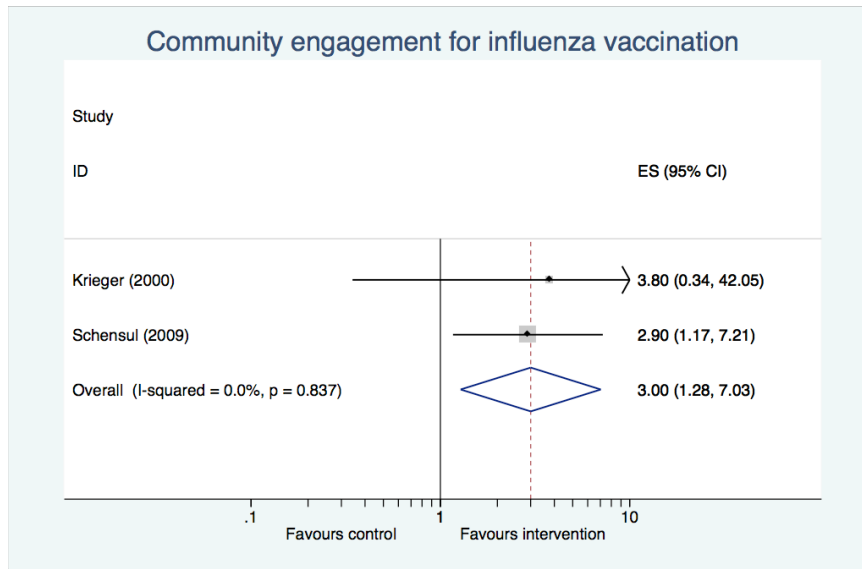

| Study ID        | Design        | Reporting                                                                                                                                                                                                                                                                                                                                                                                                                                                                                                                                                                                                                                                                                                                                                                                                                                                                                                                                                                                                                                                                                                                                                                                                                                                                                                                                                                                                                                                                                                    | validity | Internal validity - bias | confounding | Summary scores                                                                                                                                                                |
|-----------------|---------------|--------------------------------------------------------------------------------------------------------------------------------------------------------------------------------------------------------------------------------------------------------------------------------------------------------------------------------------------------------------------------------------------------------------------------------------------------------------------------------------------------------------------------------------------------------------------------------------------------------------------------------------------------------------------------------------------------------------------------------------------------------------------------------------------------------------------------------------------------------------------------------------------------------------------------------------------------------------------------------------------------------------------------------------------------------------------------------------------------------------------------------------------------------------------------------------------------------------------------------------------------------------------------------------------------------------------------------------------------------------------------------------------------------------------------------------------------------------------------------------------------------------|----------|--------------------------|-------------|-------------------------------------------------------------------------------------------------------------------------------------------------------------------------------|
|                 |               | 1. Study aim clearly defined?<br>2. Main outcomes described in methods?<br>3. Patient characteristics described?<br>4. Interventions clearly described?<br>5. Distributions of principal confounders described?<br>6. Main findings described?<br>7. Estimates of random variability provided for main outcomes?<br>8. All important potential adverse events reported?<br>9. Characteristics of patients lost to follow-up described?<br>10. Actual p-values values reported?<br>11. Subjects asked to participate representative of entire population?<br>12. Subjects prepared to participate representative of entire population?<br>13. Staff, places, and facilities representative of usual treatment?<br>14. Attempt made to blind study subjects to interventions?<br>15. Attempt made to blind those measuring main outcomes?<br>16. If results were based on "data dredging", was this clear?<br>17. Analyses adjusted for different lengths of follow-up?<br>18. Statistical tests appropriate?<br>19. Compliance with intervention(s) reliable?<br>20. Main outcomes accurate (valid and reliable)?<br>21. Patients in different groups recruited from same population?<br>22. Patients in different groups recruited over the same time period?<br>23. Study subjects randomized?<br>24. Randomization assignment concealed from patients and health care staff?<br>25. Adequate adjustment for confounding?<br>26. Losses to follow-up taken into account?<br>27. Study sufficiently powered? |          |                          |             | Reporting (/11)<br>External validity (/3)<br>Internal validity - bias (/7)<br>Internal validity - confounding (/6)<br>Power (/5)<br>Total Downs and Black summary score (/32) |
| Krieger (2000)  | cct           | 1 1 1 1 2 1 1 0 1 1                                                                                                                                                                                                                                                                                                                                                                                                                                                                                                                                                                                                                                                                                                                                                                                                                                                                                                                                                                                                                                                                                                                                                                                                                                                                                                                                                                                                                                                                                          | 1 0 1    | 0 1 1 1 1 1 1            | 1 1 1 0 1 1 | 10 2 6 5 0 23                                                                                                                                                                 |
| Schensul (2009) | cba (cluster) | 1 1 1 1 2 1 1 0 1 1                                                                                                                                                                                                                                                                                                                                                                                                                                                                                                                                                                                                                                                                                                                                                                                                                                                                                                                                                                                                                                                                                                                                                                                                                                                                                                                                                                                                                                                                                          | 1 0 1    | 0 1 1 1 1 1 0            | 0 1 0 0 1 1 | 10 2 5 3 0 20                                                                                                                                                                 |

| Study ID        | Design        | Adequate sequence generation | Allocation concealment | Blinding (or accurate outcome assessment) | Incomplete outcome data addressed | Free of other bias (i.e.: contamination effects) | Free of ROB issues |
|-----------------|---------------|------------------------------|------------------------|-------------------------------------------|-----------------------------------|--------------------------------------------------|--------------------|
| Krieger (2000)  | cct           | 1                            | 0                      | 1                                         | 1                                 | 0                                                | 0                  |
| Schensul (2009) | cba (cluster) | NRS                          | NRS                    | 1                                         | 1                                 | 1                                                | NRS                |

Exhibit B.1.6. Influenza vaccinations – Continuous quality improvement (CQI) or similar

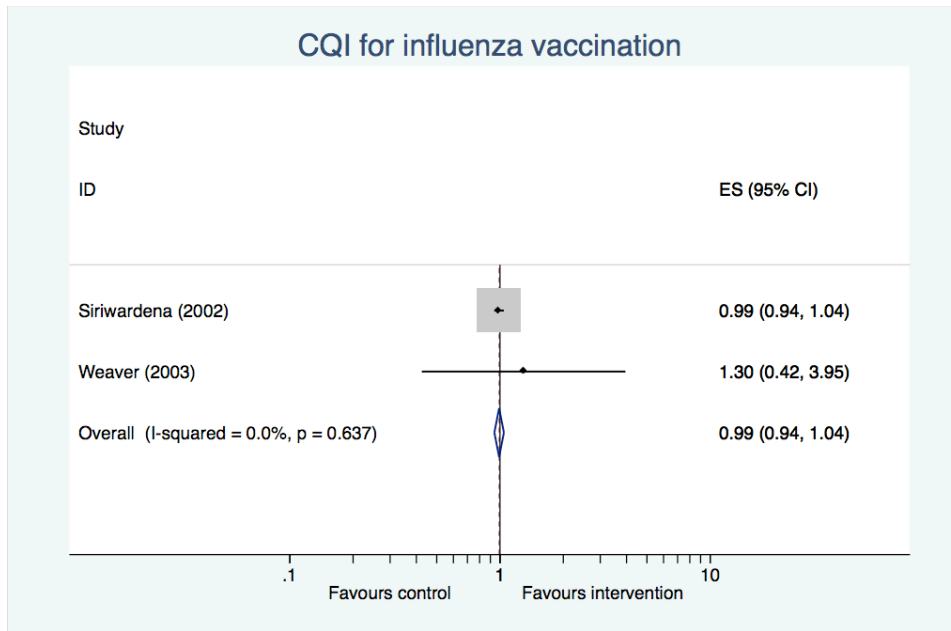

| Study ID           | Design        | Reporting                                                                                                                                                                                                                                                                                                                                                                                                                                                                      | validity                                                                                                                                                                                                                    | Internal validity - bias                                                                                                                                                                                                                                                                   | confounding                                                                                                                                                                                                                                                                                                                                                                                                                                                                                   | Summary scores                                                                                                                                                                |
|--------------------|---------------|--------------------------------------------------------------------------------------------------------------------------------------------------------------------------------------------------------------------------------------------------------------------------------------------------------------------------------------------------------------------------------------------------------------------------------------------------------------------------------|-----------------------------------------------------------------------------------------------------------------------------------------------------------------------------------------------------------------------------|--------------------------------------------------------------------------------------------------------------------------------------------------------------------------------------------------------------------------------------------------------------------------------------------|-----------------------------------------------------------------------------------------------------------------------------------------------------------------------------------------------------------------------------------------------------------------------------------------------------------------------------------------------------------------------------------------------------------------------------------------------------------------------------------------------|-------------------------------------------------------------------------------------------------------------------------------------------------------------------------------|
| Siriwardena (2002) | rct (cluster) | 1. Study aim clearly defined?<br>2. Main outcomes described in methods?<br>3. Patient characteristics described?<br>4. Interventions clearly described?<br>5. Distributions of principal confounders described?<br>6. Main findings described?<br>7. Estimates of random variability provided for main outcomes?<br>8. All important potential adverse events reported?<br>9. Characteristics of patients lost to follow-up described?<br>10. Actual p-values values reported? | 11. Subjects asked to participate representative of entire population?<br>12. Subjects prepared to participate representative of entire population?<br>13. Staff, places, and facilities representative of usual treatment? | 14. Attempt made to blind study subjects to interventions?<br>15. Attempt made to blind those measuring main outcomes?<br>16. If results were based on "data dredging", was this clear?<br>17. Analyses adjusted for different lengths of follow-up?<br>18. Statistical tests appropriate? | 19. Compliance with intervention(s) reliable?<br>20. Main outcomes accurate (valid and reliable)?<br>21. Patients in different groups recruited from same population?<br>22. Patients in different groups recruited over the same time period?<br>23. Study subjects randomized?<br>24. Randomization assignment concealed from patients and health care staff?<br>25. Adequate adjustment for confounding?<br>26. Losses to follow-up taken into account?<br>27. Study sufficiently powered? | Reporting (/11)<br>External validity (/3)<br>Internal validity - bias (/7)<br>Internal validity - confounding (/6)<br>Power (/5)<br>Total Downs and Black summary score (/32) |
| Weaver (2003)      | cba (cluster) | 1 1 1 1 2 1 1 0 1 1                                                                                                                                                                                                                                                                                                                                                                                                                                                            | 1 1 1 1                                                                                                                                                                                                                     | 1 0 1 1 1 1 0                                                                                                                                                                                                                                                                              | 1 1 1 1 1 1 1 2                                                                                                                                                                                                                                                                                                                                                                                                                                                                               | 10 3 5 6 2 26                                                                                                                                                                 |
|                    |               | 1 1 1 1 2 1 1 0 1 1                                                                                                                                                                                                                                                                                                                                                                                                                                                            | 1 1 1 1                                                                                                                                                                                                                     | 0 0 1 1 0 1 1                                                                                                                                                                                                                                                                              | 0 1 0 0 0 0 0                                                                                                                                                                                                                                                                                                                                                                                                                                                                                 | 10 3 4 1 0 18                                                                                                                                                                 |

  

| Study ID           | Design        | Adequate sequence generation | Allocation concealment | Blinding (or accurate outcome assessment) | Incomplete outcome data addressed | Free of other bias (i.e.: contamination effects) | Free of ROB issues |
|--------------------|---------------|------------------------------|------------------------|-------------------------------------------|-----------------------------------|--------------------------------------------------|--------------------|
| Siriwardena (2002) | rct (cluster) | 1                            | 1                      | 0                                         | 1                                 | 1                                                | 0                  |
| Weaver (2003)      | cba (cluster) | NRS                          | NRS                    | 1                                         | 0                                 | 1                                                | NRS                |

Exhibit B.1.7. Influenza vaccinations – Delivery site change

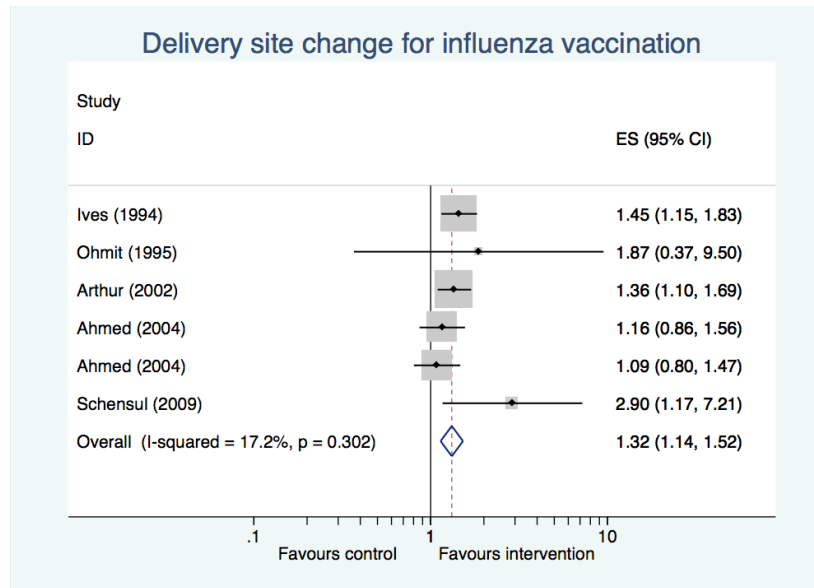

| Study ID        | Design        | Reporting                     |                                        |                                       |                                     |                                                      |                             |                                                                |                                                     |                                                             |                                      | validity                                                            |                                                                           |                                                                      | Internal validity - bias                                   |                                                          |                                                               |                                                           | confounding                        |                                               |                                                  |                                                                  | Summary scores                                                        |                                |                                                                             |                                          |                                             |                                 |                 |                        |                               |                                      |            |
|-----------------|---------------|-------------------------------|----------------------------------------|---------------------------------------|-------------------------------------|------------------------------------------------------|-----------------------------|----------------------------------------------------------------|-----------------------------------------------------|-------------------------------------------------------------|--------------------------------------|---------------------------------------------------------------------|---------------------------------------------------------------------------|----------------------------------------------------------------------|------------------------------------------------------------|----------------------------------------------------------|---------------------------------------------------------------|-----------------------------------------------------------|------------------------------------|-----------------------------------------------|--------------------------------------------------|------------------------------------------------------------------|-----------------------------------------------------------------------|--------------------------------|-----------------------------------------------------------------------------|------------------------------------------|---------------------------------------------|---------------------------------|-----------------|------------------------|-------------------------------|--------------------------------------|------------|
|                 |               | 1. Study aim clearly defined? | 2. Main outcomes described in methods? | 3. Patient characteristics described? | 4. Interventions clearly described? | 5. Distributions of principal confounders described? | 6. Main findings described? | 7. Estimates of random variability provided for main outcomes? | 8. All important potential adverse events reported? | 9. Characteristics of patients lost to follow-up described? | 10. Actual p-values values reported? | 11. Subjects asked to participate represented of entire population? | 12. Subjects prepared to participate representative of entire population? | 13. Staff, places, and facilities representative of usual treatment? | 14. Attempt made to blind study subjects to interventions? | 15. Attempt made to blind those measuring main outcomes? | 16. If results were based on "data dredging", was this clear? | 17. Analyses adjusted for different lengths of follow-up? | 18. Statistical tests appropriate? | 19. Compliance with intervention(s) reliable? | 20. Main outcomes accurate (valid and reliable)? | 21. Patients in different groups recruited from same population? | 22. Patients in different groups recruited over the same time period? | 23. Study subjects randomized? | 24. Randomization assignment concealed from patients and health care staff? | 25. Adequate adjustment for confounding? | 26. Losses to follow-up taken into account? | 27. Study sufficiently powered? | Reporting (/11) | External validity (/3) | Internal validity - bias (/7) | Internal validity - confounding (/6) | Power (/5) |
| Ahmed (2004)    | rct (cluster) | 1                             | 1                                      | 1                                     | 1                                   | 2                                                    | 1                           | 1                                                              | 0                                                   | 1                                                           | 0                                    | 1                                                                   | 1                                                                         | 1                                                                    | 1                                                          | 1                                                        | 1                                                             | 1                                                         | 1                                  | 1                                             | 1                                                | 1                                                                | 1                                                                     | 1                              | 1                                                                           | 0                                        | 9                                           | 3                               | 6               | 6                      | 0                             | 24                                   |            |
| Arthur (2002)   | rct (cluster) | 1                             | 1                                      | 1                                     | 1                                   | 2                                                    | 1                           | 1                                                              | 1                                                   | 1                                                           | 1                                    | 1                                                                   | 1                                                                         | 1                                                                    | 1                                                          | 0                                                        | 1                                                             | 1                                                         | 0                                  | 1                                             | 0                                                | 1                                                                | 1                                                                     | 1                              | 1                                                                           | 1                                        | 0                                           | 11                              | 3               | 3                      | 6                             | 0                                    | 23         |
| Ives (1994)     | cct           | 1                             | 1                                      | 1                                     | 1                                   | 1                                                    | 1                           | 1                                                              | 0                                                   | 1                                                           | 1                                    | 1                                                                   | 1                                                                         | 1                                                                    | 1                                                          | 1                                                        | 1                                                             | 1                                                         | 1                                  | 1                                             | 1                                                | 1                                                                | 1                                                                     | 1                              | 0                                                                           | 9                                        | 3                                           | 4                               | 5               | 0                      | 21                            |                                      |            |
| Ohmit (1995)    | rct (cluster) | 1                             | 1                                      | 1                                     | 1                                   | 0                                                    | 1                           | 1                                                              | 0                                                   | 1                                                           | 1                                    | 0                                                                   | 0                                                                         | 1                                                                    | 1                                                          | 1                                                        | 0                                                             | 1                                                         | 0                                  | 0                                             | 1                                                | 1                                                                | 1                                                                     | 1                              | 1                                                                           | 1                                        | 0                                           | 8                               | 1               | 4                      | 5                             | 0                                    | 18         |
| Schensul (2009) | cba (cluster) | 1                             | 1                                      | 1                                     | 1                                   | 2                                                    | 1                           | 1                                                              | 0                                                   | 1                                                           | 1                                    | 1                                                                   | 0                                                                         | 1                                                                    | 1                                                          | 1                                                        | 1                                                             | 1                                                         | 1                                  | 0                                             | 0                                                | 1                                                                | 0                                                                     | 0                              | 1                                                                           | 1                                        | 10                                          | 2                               | 5               | 3                      | 0                             | 20                                   |            |

  

| Study ID        | Design        | Adequate sequence generation | Allocation concealment | Blinding (or accurate outcome assessment) | Incomplete outcome data addressed | Free of other bias (i.e.: contamination effects) | Free of ROB issues |
|-----------------|---------------|------------------------------|------------------------|-------------------------------------------|-----------------------------------|--------------------------------------------------|--------------------|
| Ahmed (2004)    | rct (cluster) | 1                            | 1                      | 1                                         | 1                                 | 1                                                | 1                  |
| Arthur (2002)   | rct (cluster) | 1                            | 1                      | 0                                         | 1                                 | 1                                                | 0                  |
| Ives (1994)     | cct           | 1                            | 1                      | 0                                         | 0                                 | 1                                                | 0                  |
| Ohmit (1995)    | rct (cluster) | 0                            | 1                      | 1                                         | 1                                 | 1                                                | 0                  |
| Schensul (2009) | cba (cluster) | NRS                          | NRS                    | 1                                         | 1                                 | 1                                                | NRS                |

Exhibit B.1.8. Influenza vaccinations – Financial incentives (clinicians)

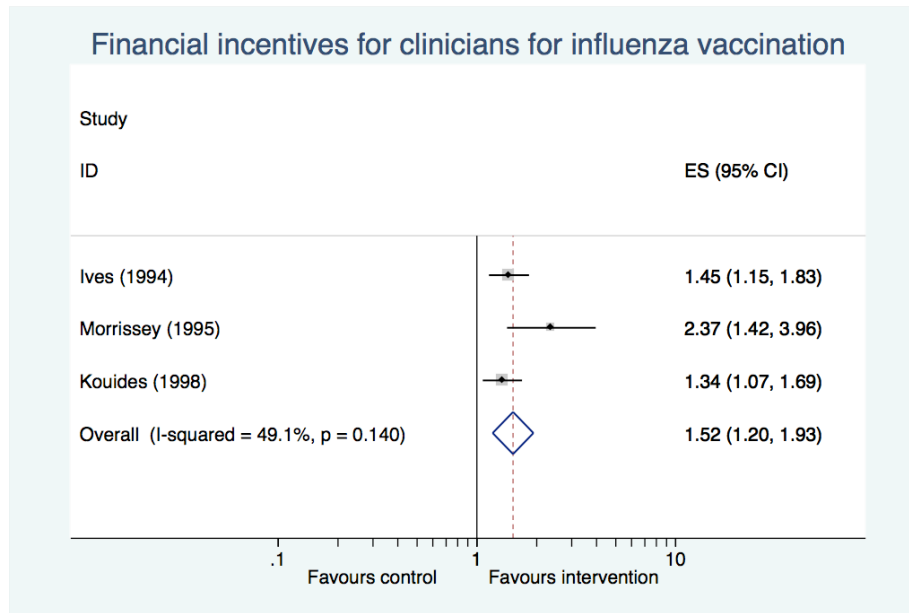

| Study ID         | Design        | Reporting                                                                                                                                                                                                                                                                                                                                                                                                                                                                                                                                                                                                                                                                                                                                                                                                                                                                                                                                                                                                                                                                                                                                                                                                                                                                                                                                                                                                                                                                                                    | validity | Internal validity - bias | confounding     | Summary scores                                                                                                                                                                |
|------------------|---------------|--------------------------------------------------------------------------------------------------------------------------------------------------------------------------------------------------------------------------------------------------------------------------------------------------------------------------------------------------------------------------------------------------------------------------------------------------------------------------------------------------------------------------------------------------------------------------------------------------------------------------------------------------------------------------------------------------------------------------------------------------------------------------------------------------------------------------------------------------------------------------------------------------------------------------------------------------------------------------------------------------------------------------------------------------------------------------------------------------------------------------------------------------------------------------------------------------------------------------------------------------------------------------------------------------------------------------------------------------------------------------------------------------------------------------------------------------------------------------------------------------------------|----------|--------------------------|-----------------|-------------------------------------------------------------------------------------------------------------------------------------------------------------------------------|
|                  |               | 1. Study aim clearly defined?<br>2. Main outcomes described in methods?<br>3. Patient characteristics described?<br>4. Interventions clearly described?<br>5. Distributions of principal confounders described?<br>6. Main findings described?<br>7. Estimates of random variability provided for main outcomes?<br>8. All important potential adverse events reported?<br>9. Characteristics of patients lost to follow-up described?<br>10. Actual p-values values reported?<br>11. Subjects asked to participate representative of entire population?<br>12. Subjects prepared to participate representative of entire population?<br>13. Staff, places, and facilities representative of usual treatment?<br>14. Attempt made to blind study subjects to interventions?<br>15. Attempt made to blind those measuring main outcomes?<br>16. If results were based on "data dredging", was this clear?<br>17. Analyses adjusted for different lengths of follow-up?<br>18. Statistical tests appropriate?<br>19. Compliance with intervention(s) reliable?<br>20. Main outcomes accurate (valid and reliable)?<br>21. Patients in different groups recruited from same population?<br>22. Patients in different groups recruited over the same time period?<br>23. Study subjects randomized?<br>24. Randomization assignment concealed from patients and health care staff?<br>25. Adequate adjustment for confounding?<br>26. Losses to follow-up taken into account?<br>27. Study sufficiently powered? |          |                          |                 | Reporting (/11)<br>External validity (/3)<br>Internal validity - bias (/7)<br>Internal validity - confounding (/6)<br>Power (/5)<br>Total Downs and Black summary score (/32) |
| Ives (1994)      | cct           | 1 1 1 1 1 1 1 0 1 1                                                                                                                                                                                                                                                                                                                                                                                                                                                                                                                                                                                                                                                                                                                                                                                                                                                                                                                                                                                                                                                                                                                                                                                                                                                                                                                                                                                                                                                                                          | 1 1 1    | 0 0 1 1 1 1 0            | 1 1 1 1 1 0     | 0 9 3 4 5 0 21                                                                                                                                                                |
| Kouides (1998)   | rct (cluster) | 1 1 1 1 0 1 1 0 1 1                                                                                                                                                                                                                                                                                                                                                                                                                                                                                                                                                                                                                                                                                                                                                                                                                                                                                                                                                                                                                                                                                                                                                                                                                                                                                                                                                                                                                                                                                          | 1 1 1    | 1 1 1 1 1 1 1            | 1 1 1 1 1 9 1 0 | 0 8 3 7 5 0 23                                                                                                                                                                |
| Morrissey (1995) | rct           | 1 1 1 1 2 1 1 0 1 1                                                                                                                                                                                                                                                                                                                                                                                                                                                                                                                                                                                                                                                                                                                                                                                                                                                                                                                                                                                                                                                                                                                                                                                                                                                                                                                                                                                                                                                                                          | 1 0 1    | 0 1 1 1 1 1 1 0          | 1 1 1 1 1 1 1 0 | 0 10 2 5 6 0 23                                                                                                                                                               |

  

| Study ID         | Design        | Adequate sequence generation | Allocation concealment | Blinding (or accurate outcome assessment) | Incomplete outcome data addressed | Free of other bias (i.e.: contamination effects) | Free of ROB issues |
|------------------|---------------|------------------------------|------------------------|-------------------------------------------|-----------------------------------|--------------------------------------------------|--------------------|
| Ives (1994)      | cct           | 1                            | 1                      | 0                                         | 0                                 | 0                                                | 0                  |
| Kouides (1998)   | rct (cluster) | 1                            | 1                      | 1                                         | 1                                 | 1                                                | 1                  |
| Morrissey (1995) | rct           | 1                            | 1                      | 1                                         | 1                                 | 0                                                | 0                  |

Exhibit B.1.9. Influenza vaccinations – Financial incentives (patients)

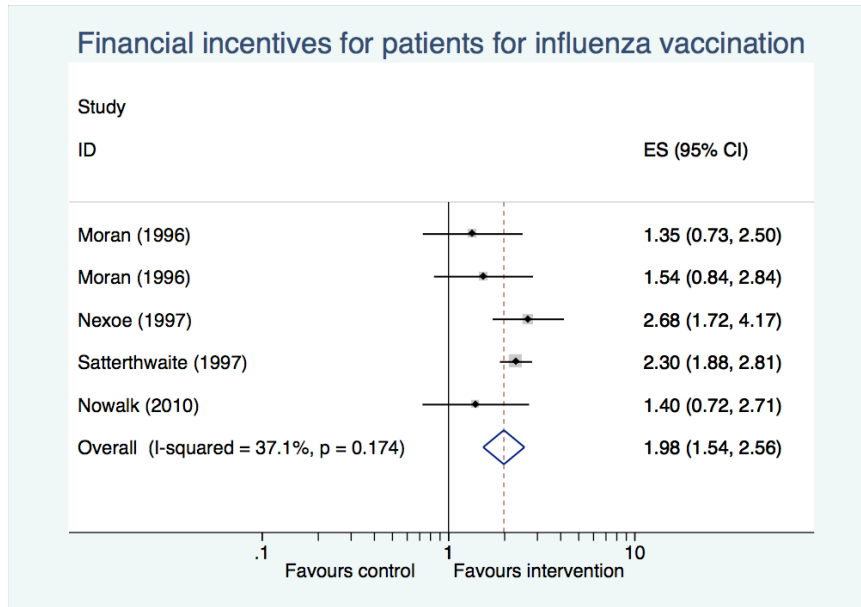

| Study ID             | Design        | Reporting                     |                                        |                                       |                                     |                                                      |                             |                                                                |                                                     |                                                             |                                      | validity                                                            |                                                                           |                                                                      | Internal validity - bias                                   |                                                          |                                                               |                                                           |                                    | confounding                                   |                                                  |                                                                  |                                                                       |                                | Summary scores                                                              |                                          |                                             |                                 |                 |                        |                               |                                      |            |                                           |
|----------------------|---------------|-------------------------------|----------------------------------------|---------------------------------------|-------------------------------------|------------------------------------------------------|-----------------------------|----------------------------------------------------------------|-----------------------------------------------------|-------------------------------------------------------------|--------------------------------------|---------------------------------------------------------------------|---------------------------------------------------------------------------|----------------------------------------------------------------------|------------------------------------------------------------|----------------------------------------------------------|---------------------------------------------------------------|-----------------------------------------------------------|------------------------------------|-----------------------------------------------|--------------------------------------------------|------------------------------------------------------------------|-----------------------------------------------------------------------|--------------------------------|-----------------------------------------------------------------------------|------------------------------------------|---------------------------------------------|---------------------------------|-----------------|------------------------|-------------------------------|--------------------------------------|------------|-------------------------------------------|
|                      |               | 1. Study aim clearly defined? | 2. Main outcomes described in methods? | 3. Patient characteristics described? | 4. Interventions clearly described? | 5. Distributions of principal confounders described? | 6. Main findings described? | 7. Estimates of random variability provided for main outcomes? | 8. All important potential adverse events reported? | 9. Characteristics of patients lost to follow-up described? | 10. Actual p-values values reported? | 11. Subjects asked to participate represented of entire population? | 12. Subjects prepared to participate representative of entire population? | 13. Staff, places, and facilities representative of usual treatment? | 14. Attempt made to blind study subjects to interventions? | 15. Attempt made to blind those measuring main outcomes? | 16. If results were based on "data dredging", was this clear? | 17. Analyses adjusted for different lengths of follow-up? | 18. Statistical tests appropriate? | 19. Compliance with intervention(s) reliable? | 20. Main outcomes accurate (valid and reliable)? | 21. Patients in different groups recruited from same population? | 22. Patients in different groups recruited over the same time period? | 23. Study subjects randomized? | 24. Randomization assignment concealed from patients and health care staff? | 25. Adequate adjustment for confounding? | 26. Losses to follow-up taken into account? | 27. Study sufficiently powered? | Reporting (/11) | External validity (/3) | Internal validity - bias (/7) | Internal validity - confounding (/6) | Power (/5) | Total Downs and Black summary score (/32) |
| Moran (1996)         | cct           | 1                             | 1                                      | 0                                     | 1                                   | 2                                                    | 1                           | 1                                                              | 0                                                   | 1                                                           | 1                                    | 1                                                                   | 1                                                                         | 1                                                                    | 0                                                          | 1                                                        | 1                                                             | 1                                                         | 1                                  | 1                                             | 1                                                | 1                                                                | 1                                                                     | 1                              | 0                                                                           | 1                                        | 1                                           | 0                               | 9               | 3                      | 6                             | 5                                    | 0          | 23                                        |
| Nexoe (1997)         | cct           | 1                             | 1                                      | 1                                     | 1                                   | 0                                                    | 1                           | 1                                                              | 0                                                   | 1                                                           | 0                                    | 1                                                                   | 1                                                                         | 1                                                                    | 0                                                          | 1                                                        | 1                                                             | 1                                                         | 1                                  | 1                                             | 1                                                | 1                                                                | 1                                                                     | 1                              | 0                                                                           | 9                                        | 1                                           | 0                               | 8               | 3                      | 6                             | 4                                    | 0          | 21                                        |
| Nowalk (2010)        | rct (cluster) | 1                             | 1                                      | 1                                     | 1                                   | 2                                                    | 1                           | 1                                                              | 1                                                   | 1                                                           | 1                                    | 1                                                                   | 0                                                                         | 1                                                                    | 0                                                          | 1                                                        | 1                                                             | 1                                                         | 1                                  | 1                                             | 1                                                | 1                                                                | 1                                                                     | 1                              | 1                                                                           | 1                                        | 1                                           | 1                               | 11              | 2                      | 6                             | 6                                    | 1          | 26                                        |
| Satterthwaite (1997) | cct           | 1                             | 1                                      | 1                                     | 1                                   | 0                                                    | 1                           | 1                                                              | 0                                                   | 1                                                           | 1                                    | 1                                                                   | 1                                                                         | 1                                                                    | 0                                                          | 1                                                        | 1                                                             | 1                                                         | 1                                  | 1                                             | 1                                                | 1                                                                | 1                                                                     | 1                              | 0                                                                           | 9                                        | 1                                           | 0                               | 8               | 3                      | 6                             | 4                                    | 0          | 21                                        |

  

| Study ID             | Design        | Adequate sequence generation | Allocation concealment | Blinding (or accurate outcome assessment) | Incomplete outcome data addressed | Free of other bias (i.e.: contamination effects) | Free of ROB issues |
|----------------------|---------------|------------------------------|------------------------|-------------------------------------------|-----------------------------------|--------------------------------------------------|--------------------|
| Moran (1996)         | cct           | 1                            | 0                      | 1                                         | 1                                 | 0                                                | 0                  |
| Nexoe (1997)         | cct           | 1                            | 0                      | 1                                         | 1                                 | 0                                                | 0                  |
| Nowalk (2010)        | rct (cluster) | 1                            | 1                      | 1                                         | 1                                 | 1                                                | 1                  |
| Satterthwaite (1997) | cct           | 1                            | 0                      | 1                                         | 1                                 | 0                                                | 0                  |

Exhibit B.1.10. Influenza vaccinations – Patient outreach

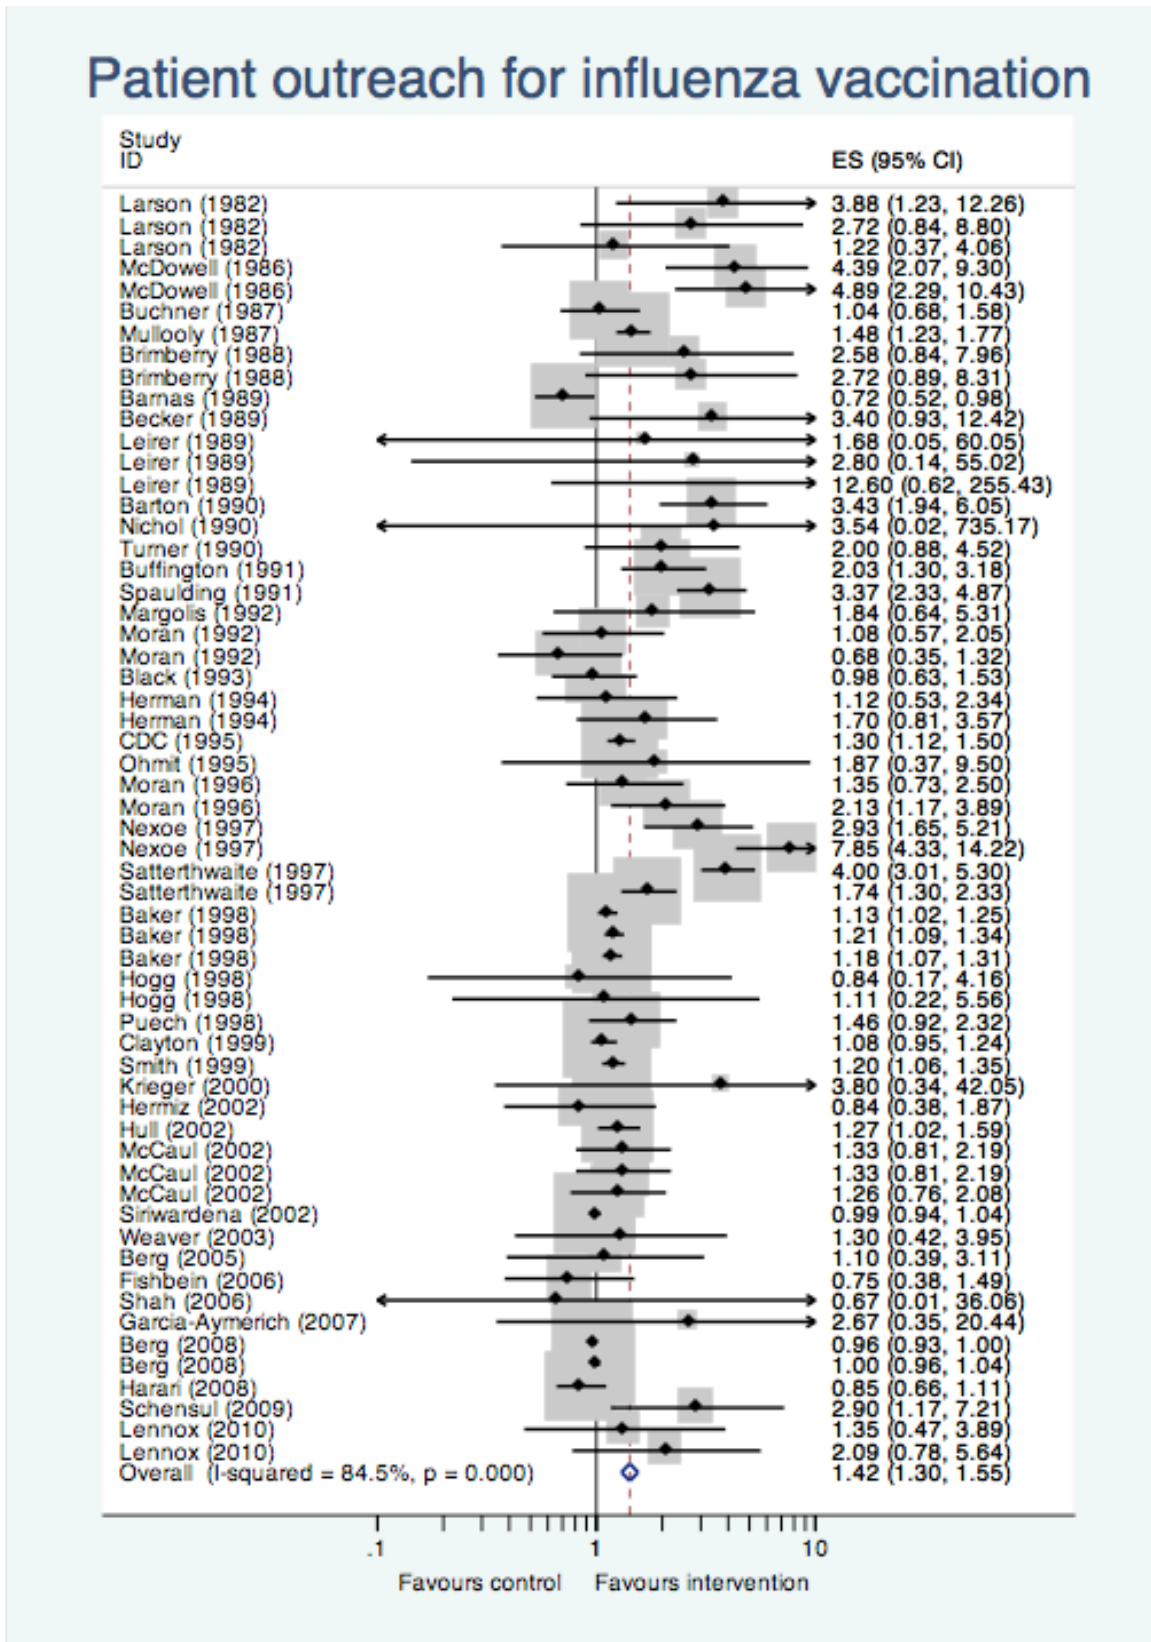

Exhibit B.1.10. Influenza vaccinations – Patient outreach (continued)

| Study ID               | Design        | Reporting                     |                                        |                                       |                                     |                                                      |                             |                                                                |                                                     |                                                             |                                      | validity                                                            | Internal validity - bias                                                  |                                                                      |                                                            |                                                          |                                                               | confounding                                               |                                    |                                               |                                                  |                                                                  | Summary scores                                                        |                                |                                                                             |                                          |                                             |                                 |                 |                        |                               |                                      |            |                                           |
|------------------------|---------------|-------------------------------|----------------------------------------|---------------------------------------|-------------------------------------|------------------------------------------------------|-----------------------------|----------------------------------------------------------------|-----------------------------------------------------|-------------------------------------------------------------|--------------------------------------|---------------------------------------------------------------------|---------------------------------------------------------------------------|----------------------------------------------------------------------|------------------------------------------------------------|----------------------------------------------------------|---------------------------------------------------------------|-----------------------------------------------------------|------------------------------------|-----------------------------------------------|--------------------------------------------------|------------------------------------------------------------------|-----------------------------------------------------------------------|--------------------------------|-----------------------------------------------------------------------------|------------------------------------------|---------------------------------------------|---------------------------------|-----------------|------------------------|-------------------------------|--------------------------------------|------------|-------------------------------------------|
|                        |               | 1. Study aim clearly defined? | 2. Main outcomes described in methods? | 3. Patient characteristics described? | 4. Interventions clearly described? | 5. Distributions of principal confounders described? | 6. Main findings described? | 7. Estimates of random variability provided for main outcomes? | 8. All important potential adverse events reported? | 9. Characteristics of patients lost to follow-up described? | 10. Actual p-values values reported? | 11. Subjects asked to participate represented of entire population? | 12. Subjects prepared to participate representative of entire population? | 13. Staff, places, and facilities representative of usual treatment? | 14. Attempt made to blind study subjects to interventions? | 15. Attempt made to blind those measuring main outcomes? | 16. If results were based on "data dredging", was this clear? | 17. Analyses adjusted for different lengths of follow-up? | 18. Statistical tests appropriate? | 19. Compliance with intervention(s) reliable? | 20. Main outcomes accurate (valid and reliable)? | 21. Patients in different groups recruited from same population? | 22. Patients in different groups recruited over the same time period? | 23. Study subjects randomized? | 24. Randomization assignment concealed from patients and health care staff? | 25. Adequate adjustment for confounding? | 26. Losses to follow-up taken into account? | 27. Study sufficiently powered? | Reporting (/11) | External validity (/3) | Internal validity - bias (/7) | Internal validity - confounding (/6) | Power (/5) | Total Downs and Black summary score (/32) |
| Baker (1998)           | cct           | 1                             | 1                                      | 1                                     | 1                                   | 2                                                    | 1                           | 1                                                              | 0                                                   | 1                                                           | 1                                    | 1                                                                   | 1                                                                         | 1                                                                    | 1                                                          | 1                                                        | 1                                                             | 1                                                         | 1                                  | 1                                             | 1                                                | 1                                                                | 1                                                                     | 1                              | 1                                                                           | 1                                        | 1                                           | 0                               | 10              | 3                      | 6                             | 6                                    | 0          | 25                                        |
| Barnas (1989)          | cct           | 1                             | 1                                      | 1                                     | 1                                   | 0                                                    | 1                           | 1                                                              | 0                                                   | 1                                                           | 0                                    | 1                                                                   | 1                                                                         | 1                                                                    | 0                                                          | 1                                                        | 1                                                             | 0                                                         | 1                                  | 1                                             | 1                                                | 0                                                                | 1                                                                     | 1                              | 0                                                                           | 1                                        | 1                                           | 0                               | 7               | 3                      | 4                             | 5                                    | 0          | 19                                        |
| Barton (1990)          | rct           | 1                             | 1                                      | 1                                     | 1                                   | 0                                                    | 1                           | 1                                                              | 0                                                   | 1                                                           | 1                                    | 1                                                                   | 1                                                                         | 1                                                                    | 1                                                          | 1                                                        | 1                                                             | 1                                                         | 0                                  | 1                                             | 0                                                | 0                                                                | 9                                                                     | 1                              | 0                                                                           | 0                                        | 0                                           | 8                               | 3               | 6                      | 2                             | 0                                    | 19         |                                           |
| Becker (1989)          | cct           | 1                             | 1                                      | 1                                     | 1                                   | 1                                                    | 1                           | 1                                                              | 0                                                   | 1                                                           | 1                                    | 1                                                                   | 0                                                                         | 1                                                                    | 1                                                          | 1                                                        | 1                                                             | 0                                                         | 1                                  | 1                                             | 1                                                | 0                                                                | 1                                                                     | 0                              | 0                                                                           | 0                                        | 0                                           | 9                               | 2               | 4                      | 4                             | 0                                    | 19         |                                           |
| Berg (2005)            | rct           | 1                             | 1                                      | 1                                     | 1                                   | 2                                                    | 1                           | 1                                                              | 0                                                   | 1                                                           | 1                                    | 1                                                                   | 1                                                                         | 1                                                                    | 1                                                          | 1                                                        | 1                                                             | 1                                                         | 1                                  | 1                                             | 1                                                | 0                                                                | 0                                                                     | 1                              | 1                                                                           | 1                                        | 0                                           | 10                              | 3               | 5                      | 4                             | 0                                    | 22         |                                           |
| Berg (2008)            | rct (cluster) | 1                             | 1                                      | 1                                     | 1                                   | 1                                                    | 1                           | 1                                                              | 0                                                   | 1                                                           | 1                                    | 1                                                                   | 1                                                                         | 1                                                                    | 1                                                          | 1                                                        | 1                                                             | 1                                                         | 1                                  | 1                                             | 1                                                | 1                                                                | 1                                                                     | 1                              | 1                                                                           | 1                                        | 0                                           | 9                               | 3               | 6                      | 5                             | 0                                    | 23         |                                           |
| Black (1993)           | cct           | 1                             | 1                                      | 1                                     | 1                                   | 1                                                    | 1                           | 1                                                              | 0                                                   | 1                                                           | 1                                    | 1                                                                   | 0                                                                         | 1                                                                    | 1                                                          | 1                                                        | 1                                                             | 1                                                         | 0                                  | 1                                             | 1                                                | 1                                                                | 0                                                                     | 1                              | 1                                                                           | 1                                        | 1                                           | 9                               | 2               | 5                      | 5                             | 1                                    | 22         |                                           |
| Brimberry (1988)       | rct           | 1                             | 1                                      | 0                                     | 1                                   | 0                                                    | 1                           | 1                                                              | 0                                                   | 1                                                           | 0                                    | 1                                                                   | 1                                                                         | 1                                                                    | 1                                                          | 1                                                        | 1                                                             | 1                                                         | 1                                  | 1                                             | 1                                                | 1                                                                | 1                                                                     | 9                              | 1                                                                           | 0                                        | 6                                           | 3                               | 5               | 5                      | 0                             | 19                                   |            |                                           |
| Buchner (1987)         | rct           | 1                             | 1                                      | 1                                     | 1                                   | 0                                                    | 1                           | 1                                                              | 0                                                   | 0                                                           | 0                                    | 1                                                                   | 1                                                                         | 1                                                                    | 1                                                          | 1                                                        | 1                                                             | 1                                                         | 1                                  | 1                                             | 1                                                | 0                                                                | 1                                                                     | 0                              | 2                                                                           | 6                                        | 3                                           | 5                               | 4               | 2                      | 20                            |                                      |            |                                           |
| Buffington (1991)      | rct (cluster) | 1                             | 1                                      | 1                                     | 1                                   | 0                                                    | 1                           | 1                                                              | 0                                                   | 1                                                           | 0                                    | 1                                                                   | 1                                                                         | 1                                                                    | 0                                                          | 1                                                        | 1                                                             | 1                                                         | 1                                  | 1                                             | 1                                                | 1                                                                | 9                                                                     | 1                              | 0                                                                           | 7                                        | 3                                           | 5                               | 5               | 0                      | 20                            |                                      |            |                                           |
| CDC (1995)             | rct (cluster) | 1                             | 1                                      | 1                                     | 1                                   | 0                                                    | 1                           | 1                                                              | 0                                                   | 1                                                           | 1                                    | 1                                                                   | 1                                                                         | 1                                                                    | 0                                                          | 1                                                        | 1                                                             | 1                                                         | 0                                  | 1                                             | 1                                                | 0                                                                | 1                                                                     | 1                              | 0                                                                           | 8                                        | 3                                           | 5                               | 5               | 0                      | 21                            |                                      |            |                                           |
| Clayton (1999)         | cct           | 1                             | 1                                      | 1                                     | 1                                   | 2                                                    | 1                           | 1                                                              | 0                                                   | 1                                                           | 1                                    | 0                                                                   | 0                                                                         | 1                                                                    | 1                                                          | 1                                                        | 1                                                             | 1                                                         | 1                                  | 1                                             | 1                                                | 1                                                                | 1                                                                     | 1                              | 4                                                                           | 10                                       | 1                                           | 5                               | 6               | 4                      | 26                            |                                      |            |                                           |
| Fishbein (2006)        | cba           | 1                             | 1                                      | 1                                     | 1                                   | 1                                                    | 1                           | 1                                                              | 0                                                   | 1                                                           | 0                                    | 1                                                                   | 1                                                                         | 1                                                                    | 1                                                          | 1                                                        | 0                                                             | 1                                                         | 1                                  | 0                                             | 0                                                | 9                                                                | 1                                                                     | 0                              | 8                                                                           | 3                                        | 4                                           | 3                               | 0               | 18                     |                               |                                      |            |                                           |
| Garcia-Aymerich (2007) | rct           | 1                             | 1                                      | 1                                     | 1                                   | 2                                                    | 1                           | 1                                                              | 0                                                   | 1                                                           | 1                                    | 1                                                                   | 1                                                                         | 1                                                                    | 1                                                          | 1                                                        | 0                                                             | 1                                                         | 1                                  | 1                                             | 1                                                | 1                                                                | 0                                                                     | 0                              | 10                                                                          | 3                                        | 5                                           | 5                               | 0               | 23                     |                               |                                      |            |                                           |
| Harari (2008)          | rct           | 1                             | 1                                      | 1                                     | 1                                   | 2                                                    | 1                           | 1                                                              | 0                                                   | 0                                                           | 1                                    | 1                                                                   | 1                                                                         | 1                                                                    | 1                                                          | 1                                                        | 0                                                             | 1                                                         | 1                                  | 1                                             | 1                                                | 1                                                                | 0                                                                     | 0                              | 9                                                                           | 3                                        | 4                                           | 4                               | 0               | 20                     |                               |                                      |            |                                           |
| Herman (1994)          | rct (cluster) | 1                             | 1                                      | 1                                     | 1                                   | 2                                                    | 1                           | 1                                                              | 0                                                   | 1                                                           | 1                                    | 1                                                                   | 1                                                                         | 1                                                                    | 1                                                          | 1                                                        | 1                                                             | 1                                                         | 1                                  | 1                                             | 1                                                | 1                                                                | 1                                                                     | 0                              | 10                                                                          | 3                                        | 5                                           | 6                               | 0               | 24                     |                               |                                      |            |                                           |
| Hermiz (2002)          | cct           | 1                             | 1                                      | 1                                     | 1                                   | 1                                                    | 1                           | 1                                                              | 0                                                   | 1                                                           | 1                                    | 1                                                                   | 0                                                                         | 1                                                                    | 1                                                          | 1                                                        | 1                                                             | 0                                                         | 1                                  | 1                                             | 1                                                | 0                                                                | 1                                                                     | 1                              | 0                                                                           | 9                                        | 2                                           | 4                               | 5               | 0                      | 20                            |                                      |            |                                           |
| Hogg (1998)            | cct           | 1                             | 1                                      | 1                                     | 1                                   | 1                                                    | 1                           | 1                                                              | 0                                                   | 1                                                           | 1                                    | 1                                                                   | 1                                                                         | 1                                                                    | 1                                                          | 1                                                        | 0                                                             | 1                                                         | 1                                  | 1                                             | 1                                                | 0                                                                | 9                                                                     | 1                              | 1                                                                           | 9                                        | 3                                           | 4                               | 4               | 1                      | 21                            |                                      |            |                                           |
| Hull (2002)            | cct           | 1                             | 1                                      | 1                                     | 1                                   | 1                                                    | 1                           | 1                                                              | 0                                                   | 1                                                           | 1                                    | 1                                                                   | 0                                                                         | 1                                                                    | 1                                                          | 1                                                        | 1                                                             | 1                                                         | 1                                  | 1                                             | 1                                                | 1                                                                | 1                                                                     | 2                              | 9                                                                           | 2                                        | 6                                           | 6                               | 2               | 25                     |                               |                                      |            |                                           |
| Krieger (2000)         | cct           | 1                             | 1                                      | 1                                     | 1                                   | 2                                                    | 1                           | 1                                                              | 0                                                   | 1                                                           | 1                                    | 1                                                                   | 0                                                                         | 1                                                                    | 1                                                          | 1                                                        | 1                                                             | 1                                                         | 1                                  | 1                                             | 1                                                | 0                                                                | 1                                                                     | 0                              | 10                                                                          | 2                                        | 6                                           | 5                               | 0               | 23                     |                               |                                      |            |                                           |
| Larson (1982)          | cct           | 1                             | 1                                      | 1                                     | 1                                   | 2                                                    | 1                           | 1                                                              | 0                                                   | 0                                                           | 0                                    | 1                                                                   | 1                                                                         | 1                                                                    | 1                                                          | 1                                                        | 0                                                             | 1                                                         | 1                                  | 1                                             | 1                                                | 0                                                                | 1                                                                     | 0                              | 8                                                                           | 3                                        | 4                                           | 4                               | 0               | 19                     |                               |                                      |            |                                           |
| Leirer (1989)          | rct           | 1                             | 1                                      | 1                                     | 1                                   | 0                                                    | 1                           | 1                                                              | 1                                                   | 0                                                           | 1                                    | 1                                                                   | 1                                                                         | 0                                                                    | 1                                                          | 0                                                        | 1                                                             | 0                                                         | 1                                  | 1                                             | 1                                                | 0                                                                | 9                                                                     | 1                              | 0                                                                           | 8                                        | 3                                           | 3                               | 4               | 0                      | 18                            |                                      |            |                                           |
| Lennox (2010)          | rct (cluster) | 1                             | 0                                      | 1                                     | 1                                   | 2                                                    | 1                           | 1                                                              | 1                                                   | 1                                                           | 1                                    | 0                                                                   | 1                                                                         | 1                                                                    | 1                                                          | 1                                                        | 1                                                             | 1                                                         | 1                                  | 1                                             | 1                                                | 1                                                                | 1                                                                     | 0                              | 10                                                                          | 2                                        | 6                                           | 6                               | 0               | 24                     |                               |                                      |            |                                           |

Exhibit B.1.10. Influenza vaccinations – Patient outreach (continued)

| Study ID             | Design        | Reporting                     |                                        |                                       |                                     |                                                      |                             |                                                                |                                                     |                                                             |                                      | validity                                                            | Internal validity - bias                                                  |                                                                      |                                                            |                                                          |                                                               | confounding                                               |                                    |                                               |                                                  |                                                                  | Summary scores                                                        |                                |                                                                             |                                          |                                             |                                 |                 |                        |                               |                                      |            |                                           |    |
|----------------------|---------------|-------------------------------|----------------------------------------|---------------------------------------|-------------------------------------|------------------------------------------------------|-----------------------------|----------------------------------------------------------------|-----------------------------------------------------|-------------------------------------------------------------|--------------------------------------|---------------------------------------------------------------------|---------------------------------------------------------------------------|----------------------------------------------------------------------|------------------------------------------------------------|----------------------------------------------------------|---------------------------------------------------------------|-----------------------------------------------------------|------------------------------------|-----------------------------------------------|--------------------------------------------------|------------------------------------------------------------------|-----------------------------------------------------------------------|--------------------------------|-----------------------------------------------------------------------------|------------------------------------------|---------------------------------------------|---------------------------------|-----------------|------------------------|-------------------------------|--------------------------------------|------------|-------------------------------------------|----|
|                      |               | 1. Study aim clearly defined? | 2. Main outcomes described in methods? | 3. Patient characteristics described? | 4. Interventions clearly described? | 5. Distributions of principal confounders described? | 6. Main findings described? | 7. Estimates of random variability provided for main outcomes? | 8. All important potential adverse events reported? | 9. Characteristics of patients lost to follow-up described? | 10. Actual p-values values reported? | 11. Subjects asked to participate represented of entire population? | 12. Subjects prepared to participate representative of entire population? | 13. Staff, places, and facilities representative of usual treatment? | 14. Attempt made to blind study subjects to interventions? | 15. Attempt made to blind those measuring main outcomes? | 16. If results were based on "data dredging", was this clear? | 17. Analyses adjusted for different lengths of follow-up? | 18. Statistical tests appropriate? | 19. Compliance with intervention(s) reliable? | 20. Main outcomes accurate (valid and reliable)? | 21. Patients in different groups recruited from same population? | 22. Patients in different groups recruited over the same time period? | 23. Study subjects randomized? | 24. Randomization assignment concealed from patients and health care staff? | 25. Adequate adjustment for confounding? | 26. Losses to follow-up taken into account? | 27. Study sufficiently powered? | Reporting (/11) | External validity (/3) | Internal validity - bias (/7) | Internal validity - confounding (/6) | Power (/5) | Total Downs and Black summary score (/32) |    |
| Margolis (1992)      | cba (cluster) | 1                             | 1                                      | 1                                     | 1                                   | 0                                                    | 1                           | 1                                                              | 0                                                   | 1                                                           | 0                                    | 1                                                                   | 1                                                                         | 1                                                                    | 1                                                          | 1                                                        | 1                                                             | 1                                                         | 1                                  | 1                                             | 1                                                | 1                                                                | 0                                                                     | 0                              | 9                                                                           | 1                                        | 0                                           | 0                               | 7               | 3                      | 6                             | 3                                    | 0          | 19                                        |    |
| McCaul (2002)        | rct (cluster) | 1                             | 1                                      | 0                                     | 1                                   | 0                                                    | 1                           | 1                                                              | 0                                                   | 1                                                           | 1                                    | 1                                                                   | 1                                                                         | 1                                                                    | 1                                                          | 1                                                        | 1                                                             | 1                                                         | 1                                  | 1                                             | 1                                                | 1                                                                | 1                                                                     | 1                              | 1                                                                           | 9                                        | 1                                           | 0                               | 7               | 3                      | 5                             | 5                                    | 0          | 20                                        |    |
| McDowell (1986)      | cct           | 1                             | 1                                      | 1                                     | 1                                   | 0                                                    | 1                           | 1                                                              | 0                                                   | 1                                                           | 0                                    | 1                                                                   | 1                                                                         | 1                                                                    | 1                                                          | 1                                                        | 1                                                             | 1                                                         | 1                                  | 1                                             | 1                                                | 1                                                                | 1                                                                     | 1                              | 1                                                                           | 1                                        | 1                                           | 1                               | 7               | 3                      | 6                             | 5                                    | 1          | 22                                        |    |
| Moran (1992)         | cct           | 1                             | 1                                      | 0                                     | 1                                   | 0                                                    | 1                           | 1                                                              | 0                                                   | 1                                                           | 0                                    | 1                                                                   | 1                                                                         | 1                                                                    | 1                                                          | 1                                                        | 0                                                             | 1                                                         | 1                                  | 1                                             | 1                                                | 1                                                                | 1                                                                     | 1                              | 1                                                                           | 1                                        | 1                                           | 1                               | 6               | 3                      | 4                             | 6                                    | 1          | 20                                        |    |
| Moran (1996)         | cct           | 1                             | 1                                      | 0                                     | 1                                   | 2                                                    | 1                           | 1                                                              | 0                                                   | 1                                                           | 1                                    | 1                                                                   | 1                                                                         | 1                                                                    | 1                                                          | 1                                                        | 1                                                             | 1                                                         | 1                                  | 1                                             | 1                                                | 1                                                                | 1                                                                     | 1                              | 1                                                                           | 1                                        | 0                                           | 9                               | 3               | 6                      | 5                             | 0                                    | 23         |                                           |    |
| Mullooly (1987)      | cct           | 1                             | 1                                      | 1                                     | 1                                   | 1                                                    | 1                           | 1                                                              | 0                                                   | 1                                                           | 1                                    | 1                                                                   | 1                                                                         | 1                                                                    | 1                                                          | 1                                                        | 1                                                             | 1                                                         | 1                                  | 1                                             | 1                                                | 1                                                                | 1                                                                     | 1                              | 1                                                                           | 1                                        | 1                                           | 0                               | 9               | 3                      | 4                             | 5                                    | 0          | 21                                        |    |
| Nexoe (1997)         | cct           | 1                             | 1                                      | 1                                     | 1                                   | 0                                                    | 1                           | 1                                                              | 0                                                   | 1                                                           | 0                                    | 1                                                                   | 1                                                                         | 1                                                                    | 1                                                          | 1                                                        | 1                                                             | 1                                                         | 1                                  | 1                                             | 1                                                | 1                                                                | 1                                                                     | 1                              | 1                                                                           | 1                                        | 0                                           | 8                               | 3               | 6                      | 4                             | 0                                    | 21         |                                           |    |
| Nichol (1990)        | pcs (cluster) | 1                             | 1                                      | 1                                     | 1                                   | 1                                                    | 1                           | 1                                                              | 0                                                   | 0                                                           | 0                                    | 1                                                                   | 1                                                                         | 1                                                                    | 1                                                          | 1                                                        | 1                                                             | 1                                                         | 1                                  | 1                                             | 1                                                | 1                                                                | 1                                                                     | 1                              | 1                                                                           | 0                                        | 0                                           | 7                               | 3               | 6                      | 1                             | 0                                    | 17         |                                           |    |
| Ohmit (1995)         | rct (cluster) | 1                             | 1                                      | 1                                     | 1                                   | 0                                                    | 1                           | 1                                                              | 0                                                   | 1                                                           | 1                                    | 0                                                                   | 0                                                                         | 1                                                                    | 1                                                          | 0                                                        | 1                                                             | 0                                                         | 1                                  | 1                                             | 1                                                | 1                                                                | 1                                                                     | 1                              | 1                                                                           | 1                                        | 1                                           | 0                               | 8               | 1                      | 4                             | 5                                    | 0          | 18                                        |    |
| Puech (1998)         | rct           | 1                             | 1                                      | 1                                     | 1                                   | 2                                                    | 1                           | 1                                                              | 0                                                   | 1                                                           | 1                                    | 1                                                                   | 1                                                                         | 1                                                                    | 1                                                          | 1                                                        | 1                                                             | 1                                                         | 1                                  | 1                                             | 1                                                | 1                                                                | 1                                                                     | 1                              | 1                                                                           | 1                                        | 1                                           | 0                               | 10              | 3                      | 5                             | 6                                    | 0          | 24                                        |    |
| Satterthwaite (1997) | cct           | 1                             | 1                                      | 1                                     | 1                                   | 0                                                    | 1                           | 1                                                              | 0                                                   | 1                                                           | 1                                    | 1                                                                   | 1                                                                         | 1                                                                    | 1                                                          | 1                                                        | 1                                                             | 1                                                         | 1                                  | 1                                             | 1                                                | 1                                                                | 1                                                                     | 1                              | 1                                                                           | 0                                        | 9                                           | 1                               | 0               | 8                      | 3                             | 6                                    | 4          | 0                                         | 21 |
| Schensul (2009)      | cba (cluster) | 1                             | 1                                      | 1                                     | 1                                   | 2                                                    | 1                           | 1                                                              | 0                                                   | 1                                                           | 1                                    | 1                                                                   | 0                                                                         | 1                                                                    | 1                                                          | 1                                                        | 1                                                             | 1                                                         | 1                                  | 1                                             | 1                                                | 1                                                                | 1                                                                     | 1                              | 1                                                                           | 1                                        | 1                                           | 0                               | 10              | 2                      | 5                             | 3                                    | 0          | 20                                        |    |
| Shah (2006)          | pcs (cluster) | 1                             | 1                                      | 1                                     | 1                                   | 2                                                    | 1                           | 1                                                              | 0                                                   | 0                                                           | 1                                    | 1                                                                   | 1                                                                         | 1                                                                    | 1                                                          | 1                                                        | 1                                                             | 1                                                         | 1                                  | 1                                             | 1                                                | 1                                                                | 1                                                                     | 1                              | 1                                                                           | 1                                        | 0                                           | 0                               | 10              | 3                      | 4                             | 4                                    | 0          | 21                                        |    |
| Siriwardena (2002)   | rct (cluster) | 1                             | 1                                      | 1                                     | 1                                   | 2                                                    | 1                           | 1                                                              | 0                                                   | 1                                                           | 1                                    | 1                                                                   | 1                                                                         | 1                                                                    | 1                                                          | 1                                                        | 1                                                             | 1                                                         | 1                                  | 1                                             | 1                                                | 1                                                                | 1                                                                     | 1                              | 1                                                                           | 1                                        | 1                                           | 2                               | 10              | 3                      | 5                             | 6                                    | 2          | 26                                        |    |
| Smith (1999)         | rct           | 1                             | 1                                      | 1                                     | 1                                   | 1                                                    | 1                           | 1                                                              | 0                                                   | 0                                                           | 1                                    | 1                                                                   | 1                                                                         | 1                                                                    | 1                                                          | 1                                                        | 1                                                             | 1                                                         | 1                                  | 1                                             | 1                                                | 1                                                                | 1                                                                     | 1                              | 1                                                                           | 1                                        | 0                                           | 0                               | 8               | 3                      | 6                             | 5                                    | 0          | 22                                        |    |
| Spaulding (1991)     | rct           | 1                             | 1                                      | 1                                     | 1                                   | 1                                                    | 1                           | 1                                                              | 0                                                   | 1                                                           | 1                                    | 1                                                                   | 1                                                                         | 1                                                                    | 1                                                          | 1                                                        | 1                                                             | 1                                                         | 1                                  | 1                                             | 1                                                | 1                                                                | 1                                                                     | 1                              | 1                                                                           | 1                                        | 1                                           | 0                               | 9               | 3                      | 6                             | 5                                    | 0          | 23                                        |    |
| Turner (1990)        | rct (cluster) | 1                             | 1                                      | 1                                     | 1                                   | 1                                                    | 1                           | 1                                                              | 0                                                   | 1                                                           | 1                                    | 1                                                                   | 1                                                                         | 1                                                                    | 0                                                          | 1                                                        | 0                                                             | 1                                                         | 0                                  | 1                                             | 1                                                | 1                                                                | 1                                                                     | 1                              | 1                                                                           | 1                                        | 1                                           | 0                               | 9               | 3                      | 3                             | 6                                    | 0          | 21                                        |    |
| Weaver (2003)        | cba (cluster) | 1                             | 1                                      | 1                                     | 1                                   | 2                                                    | 1                           | 1                                                              | 0                                                   | 1                                                           | 1                                    | 1                                                                   | 1                                                                         | 1                                                                    | 0                                                          | 1                                                        | 1                                                             | 1                                                         | 1                                  | 1                                             | 1                                                | 1                                                                | 1                                                                     | 1                              | 1                                                                           | 1                                        | 0                                           | 0                               | 10              | 3                      | 4                             | 1                                    | 0          | 18                                        |    |



## Exhibit B.1.10. Influenza vaccinations – Patient outreach (continued)

| Study ID               | Design        | Adequate sequence generation | Allocation concealment | Blinding (or accurate outcome assessment) | Incomplete outcome data addressed | Free of other bias (i.e.: contamination effects) | Free of ROB issues |
|------------------------|---------------|------------------------------|------------------------|-------------------------------------------|-----------------------------------|--------------------------------------------------|--------------------|
| Baker (1998)           | cct           | 1                            | 1                      | 1                                         | 1                                 | 0                                                | 0                  |
| Barnas (1989)          | cct           | 1                            | 0                      | 0                                         | 1                                 | 0                                                | 0                  |
| Barton (1990)          | rct           | NRS                          | NRS                    | 1                                         | 1                                 | 0                                                | NRS                |
| Becker (1989)          | cct           | 1                            | 0                      | 0                                         | 0                                 | 0                                                | 0                  |
| Berg (2005)            | rct           | NRS                          | NRS                    | 1                                         | 1                                 | 0                                                | NRS                |
| Berg (2008)            | rct (cluster) | 1                            | 1                      | 1                                         | 1                                 | 1                                                | 1                  |
| Black (1993)           | cct           | 1                            | 0                      | 1                                         | 1                                 | 0                                                | 0                  |
| Brimberry (1988)       | rct           | 1                            | 1                      | 1                                         | 1                                 | 0                                                | 0                  |
| Buchner (1987)         | rct           | 1                            | 0                      | 1                                         | 0                                 | 0                                                | 0                  |
| Buffington (1991)      | rct (cluster) | 1                            | 1                      | 1                                         | 1                                 | 1                                                | 1                  |
| CDC (1995)             | rct (cluster) | 0                            | 1                      | 1                                         | 1                                 | 1                                                | 0                  |
| Clayton (1999)         | cct           | 1                            | 1                      | 1                                         | 1                                 | 0                                                | 0                  |
| Fishbein (2006)        | cba           | NRS                          | NRS                    | 0                                         | 1                                 | 0                                                | NRS                |
| Garcia-Aymerich (2007) | rct           | 1                            | 1                      | 1                                         | 0                                 | 0                                                | 0                  |
| Harari (2008)          | rct           | 1                            | 1                      | 0                                         | 0                                 | 0                                                | 0                  |
| Herman (1994)          | rct (cluster) | 1                            | 1                      | 1                                         | 1                                 | 1                                                | 1                  |
| Hermiz (2002)          | cct           | 1                            | 0                      | 0                                         | 1                                 | 0                                                | 0                  |
| Hogg (1998)            | cct           | 1                            | 0                      | 0                                         | 1                                 | 0                                                | 0                  |
| Hull (2002)            | cct           | 1                            | 1                      | 1                                         | 1                                 | 0                                                | 0                  |
| Krieger (2000)         | cct           | 1                            | 0                      | 1                                         | 1                                 | 0                                                | 0                  |
| Larson (1982)          | cct           | 1                            | 0                      | 0                                         | 0                                 | 0                                                | 0                  |
| Leirer (1989)          | rct           | 1                            | 0                      | 0                                         | 1                                 | 0                                                | 0                  |
| Lennox (2010)          | rct (cluster) | 1                            | 1                      | 1                                         | 1                                 | 1                                                | 1                  |
| Margolis (1992)        | cba (cluster) | NRS                          | NRS                    | 1                                         | 1                                 | 1                                                | NRS                |
| McCaul (2002)          | rct (cluster) | 1                            | 1                      | 1                                         | 1                                 | 1                                                | 1                  |
| McDowell (1986)        | cct           | 1                            | 0                      | 1                                         | 1                                 | 0                                                | 0                  |
| Moran (1992)           | cct           | 1                            | 0                      | 0                                         | 1                                 | 0                                                | 0                  |
| Moran (1996)           | cct           | 1                            | 0                      | 1                                         | 1                                 | 0                                                | 0                  |
| Mullooly (1987)        | cct           | 1                            | 0                      | 0                                         | 1                                 | 0                                                | 0                  |
| Nexoe (1997)           | cct           | 1                            | 0                      | 1                                         | 1                                 | 0                                                | 0                  |
| Nichol (1990)          | pcs (cluster) | NRS                          | NRS                    | 1                                         | 0                                 | 1                                                | NRS                |
| Ohmit (1995)           | rct (cluster) | 0                            | 1                      | 1                                         | 1                                 | 1                                                | 0                  |
| Puech (1998)           | rct           | 1                            | 1                      | 1                                         | 1                                 | 0                                                | 0                  |
| Satterthwaite (1997)   | cct           | 1                            | 0                      | 1                                         | 1                                 | 0                                                | 0                  |
| Schensul (2009)        | cba (cluster) | NRS                          | NRS                    | 1                                         | 1                                 | 1                                                | NRS                |
| Shah (2006)            | pcs (cluster) | NRS                          | NRS                    | 0                                         | 0                                 | 1                                                | NRS                |
| Siriwardena (2002)     | rct (cluster) | 1                            | 1                      | 0                                         | 1                                 | 1                                                | 0                  |
| Smith (1999)           | rct           | 1                            | 1                      | 1                                         | 0                                 | 0                                                | 0                  |
| Spaulding (1991)       | rct           | 1                            | 1                      | 1                                         | 1                                 | 0                                                | 0                  |
| Turner (1990)          | rct (cluster) | 1                            | 1                      | 0                                         | 1                                 | 1                                                | 0                  |
| Weaver (2003)          | cba (cluster) | NRS                          | NRS                    | 1                                         | 0                                 | 1                                                | NRS                |

Exhibit B.1.11. Influenza vaccinations – Team change

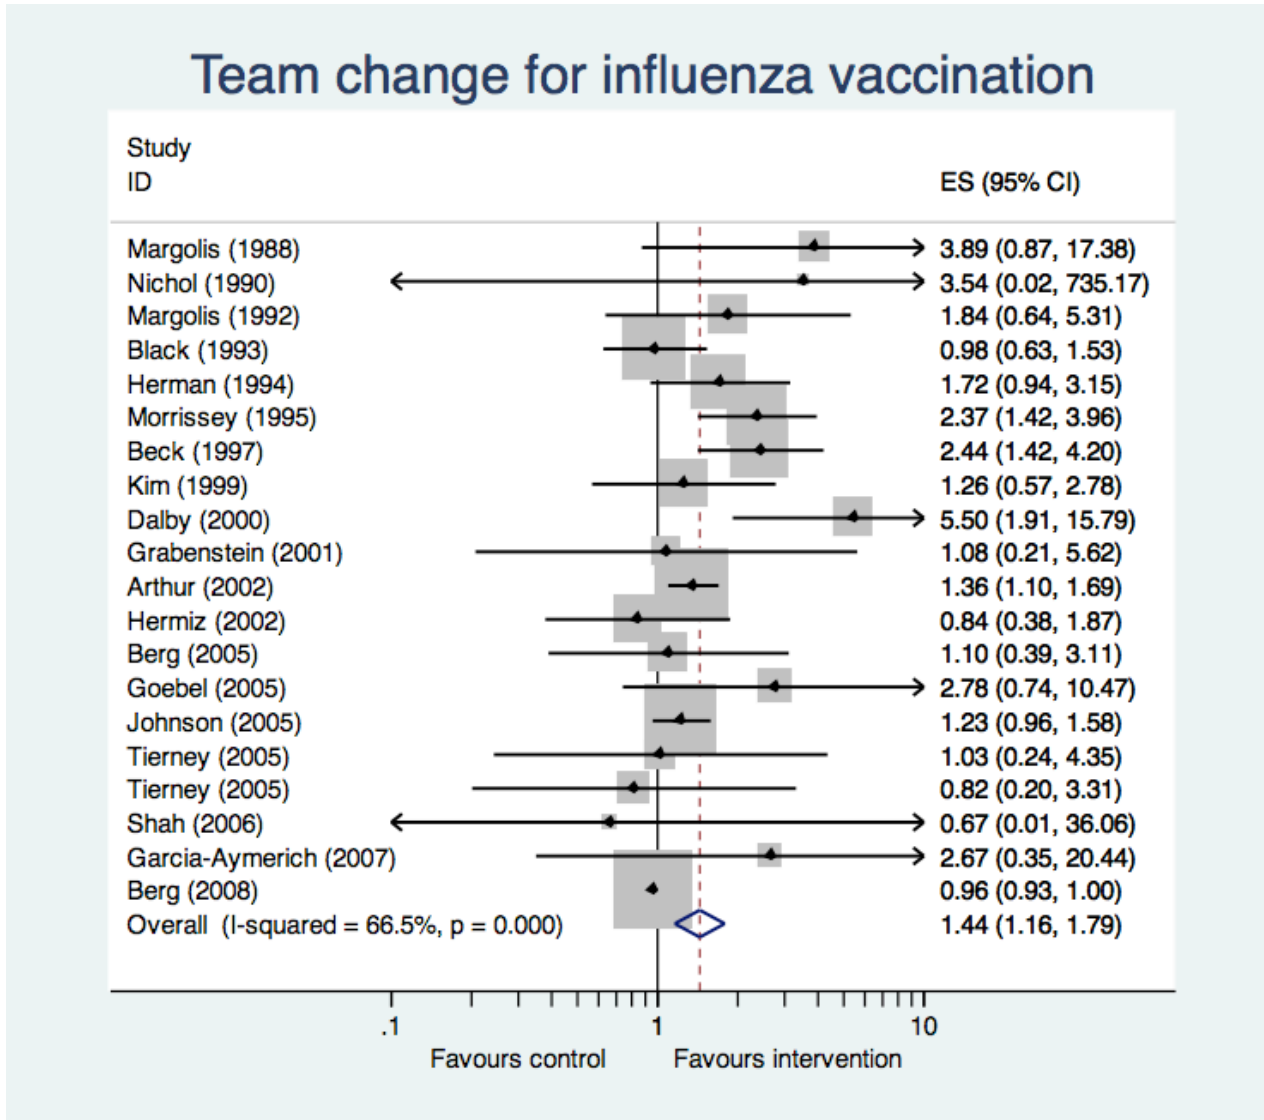

Exhibit B.1.11. Influenza vaccinations – Team change (continued)

| Study ID                                  | Design        | Reporting                                                                                                                                                                                                                                                                                                                                                                                                                                                                                                                                                                                                                                                                                                                                                                                                                                                                                                                                                                                                                                                                                                                                                                                                                                                                                                                                                                                                                                                                                                    | validity | Internal validity - bias | confounding   | Summary scores                                                                                                                   |
|-------------------------------------------|---------------|--------------------------------------------------------------------------------------------------------------------------------------------------------------------------------------------------------------------------------------------------------------------------------------------------------------------------------------------------------------------------------------------------------------------------------------------------------------------------------------------------------------------------------------------------------------------------------------------------------------------------------------------------------------------------------------------------------------------------------------------------------------------------------------------------------------------------------------------------------------------------------------------------------------------------------------------------------------------------------------------------------------------------------------------------------------------------------------------------------------------------------------------------------------------------------------------------------------------------------------------------------------------------------------------------------------------------------------------------------------------------------------------------------------------------------------------------------------------------------------------------------------|----------|--------------------------|---------------|----------------------------------------------------------------------------------------------------------------------------------|
|                                           |               | 1. Study aim clearly defined?<br>2. Main outcomes described in methods?<br>3. Patient characteristics described?<br>4. Interventions clearly described?<br>5. Distributions of principal confounders described?<br>6. Main findings described?<br>7. Estimates of random variability provided for main outcomes?<br>8. All important potential adverse events reported?<br>9. Characteristics of patients lost to follow-up described?<br>10. Actual p-values values reported?<br>11. Subjects asked to participate representative of entire population?<br>12. Subjects prepared to participate representative of entire population?<br>13. Staff, places, and facilities representative of usual treatment?<br>14. Attempt made to blind study subjects to interventions?<br>15. Attempt made to blind those measuring main outcomes?<br>16. If results were based on "data dredging", was this clear?<br>17. Analyses adjusted for different lengths of follow-up?<br>18. Statistical tests appropriate?<br>19. Compliance with intervention(s) reliable?<br>20. Main outcomes accurate (valid and reliable)?<br>21. Patients in different groups recruited from same population?<br>22. Patients in different groups recruited over the same time period?<br>23. Study subjects randomized?<br>24. Randomization assignment concealed from patients and health care staff?<br>25. Adequate adjustment for confounding?<br>26. Losses to follow-up taken into account?<br>27. Study sufficiently powered? |          |                          |               | Reporting (/11)<br>External validity (/3)<br>Internal validity - bias (/7)<br>Internal validity - confounding (/6)<br>Power (/5) |
| Arthur (2002)                             | rct (cluster) | 1 1 1 1 2 1 1 1 1 1                                                                                                                                                                                                                                                                                                                                                                                                                                                                                                                                                                                                                                                                                                                                                                                                                                                                                                                                                                                                                                                                                                                                                                                                                                                                                                                                                                                                                                                                                          | 1 1 1    | 0 0 1 1 0 1 0            | 1 1 1 1 1 1 1 | 0 11 3 3 6 0 23                                                                                                                  |
| Beck (1997)                               | cct           | 1 1 1 1 2 1 1 0 0 1                                                                                                                                                                                                                                                                                                                                                                                                                                                                                                                                                                                                                                                                                                                                                                                                                                                                                                                                                                                                                                                                                                                                                                                                                                                                                                                                                                                                                                                                                          | 1 0 1    | 0 1 1 1 1 1 1            | 1 1 1 0 1 1 1 | 0 9 2 6 4 0 21                                                                                                                   |
| Berg (2005)                               | rct           | 1 1 1 1 2 1 1 0 1 1                                                                                                                                                                                                                                                                                                                                                                                                                                                                                                                                                                                                                                                                                                                                                                                                                                                                                                                                                                                                                                                                                                                                                                                                                                                                                                                                                                                                                                                                                          | 1 1 1    | 0 1 1 1 1 1 1            | 1 1 0 0 1 1 1 | 0 10 3 5 4 0 22                                                                                                                  |
| Berg (2008)                               | rct (cluster) | 1 1 1 1 1 1 1 0 1 1                                                                                                                                                                                                                                                                                                                                                                                                                                                                                                                                                                                                                                                                                                                                                                                                                                                                                                                                                                                                                                                                                                                                                                                                                                                                                                                                                                                                                                                                                          | 1 1 1    | 0 1 1 1 1 1 1            | 1 1 1 1 1 1 1 | 0 9 3 6 5 0 23                                                                                                                   |
| Black (1993)                              | cct           | 1 1 1 1 1 1 1 0 1 1                                                                                                                                                                                                                                                                                                                                                                                                                                                                                                                                                                                                                                                                                                                                                                                                                                                                                                                                                                                                                                                                                                                                                                                                                                                                                                                                                                                                                                                                                          | 1 0 1    | 0 1 1 1 1 1 1            | 1 1 1 0 1 1 1 | 1 9 2 5 5 1 22                                                                                                                   |
| Dalby (2000)                              | rct           | 1 1 1 1 1 1 1 0 0 1                                                                                                                                                                                                                                                                                                                                                                                                                                                                                                                                                                                                                                                                                                                                                                                                                                                                                                                                                                                                                                                                                                                                                                                                                                                                                                                                                                                                                                                                                          | 1 0 1    | 0 1 1 1 1 1 1            | 1 1 1 1 1 1 0 | 0 8 2 5 5 0 20                                                                                                                   |
| Garcia-Aymerich (2007)                    | rct           | 1 1 1 1 2 1 1 0 1 1                                                                                                                                                                                                                                                                                                                                                                                                                                                                                                                                                                                                                                                                                                                                                                                                                                                                                                                                                                                                                                                                                                                                                                                                                                                                                                                                                                                                                                                                                          | 1 1 1    | 0 1 1 1 1 1 1            | 1 1 1 1 1 1 0 | 0 10 3 5 5 0 23                                                                                                                  |
| Goebel (2005)                             | rct (cluster) | 1 1 1 1 1 1 1 0 1 1                                                                                                                                                                                                                                                                                                                                                                                                                                                                                                                                                                                                                                                                                                                                                                                                                                                                                                                                                                                                                                                                                                                                                                                                                                                                                                                                                                                                                                                                                          | 1 1 1    | 1 1 1 1 0 1 1            | 1 1 0 0 9 1 1 | 0 9 3 6 3 0 21                                                                                                                   |
| Grabenstein (2001)                        | rct (cluster) | 1 1 1 1 0 1 1 0 0 1                                                                                                                                                                                                                                                                                                                                                                                                                                                                                                                                                                                                                                                                                                                                                                                                                                                                                                                                                                                                                                                                                                                                                                                                                                                                                                                                                                                                                                                                                          | 1 0 1    | 0 1 1 1 1 1 1            | 0 1 0 0 9 0 0 | 0 7 1 6 1 0 15                                                                                                                   |
| Herman (1994)                             | rct (cluster) | 1 1 1 1 2 1 1 0 1 1                                                                                                                                                                                                                                                                                                                                                                                                                                                                                                                                                                                                                                                                                                                                                                                                                                                                                                                                                                                                                                                                                                                                                                                                                                                                                                                                                                                                                                                                                          | 1 1 1    | 0 0 1 1 1 1 1            | 1 1 1 1 1 1 1 | 0 10 3 5 6 0 24                                                                                                                  |
| Hermiz (2002)                             | cct           | 1 1 1 1 1 1 1 0 1 1                                                                                                                                                                                                                                                                                                                                                                                                                                                                                                                                                                                                                                                                                                                                                                                                                                                                                                                                                                                                                                                                                                                                                                                                                                                                                                                                                                                                                                                                                          | 1 0 1    | 0 0 1 1 1 1 1            | 1 1 1 0 1 1 1 | 0 9 2 4 5 0 20                                                                                                                   |
| Johnson (2005)                            | rct           | 1 1 1 1 2 1 1 0 1 1                                                                                                                                                                                                                                                                                                                                                                                                                                                                                                                                                                                                                                                                                                                                                                                                                                                                                                                                                                                                                                                                                                                                                                                                                                                                                                                                                                                                                                                                                          | 0 0 1    | 0 1 1 1 1 1 1            | 1 1 0 0 1 1 1 | 0 10 1 6 4 0 21                                                                                                                  |
| Kim (1999)                                | rct (cluster) | 1 1 1 1 2 1 1 0 1 1                                                                                                                                                                                                                                                                                                                                                                                                                                                                                                                                                                                                                                                                                                                                                                                                                                                                                                                                                                                                                                                                                                                                                                                                                                                                                                                                                                                                                                                                                          | 1 0 1    | 1 0 1 1 1 1 1            | 1 1 1 1 1 1 1 | 0 10 2 5 6 0 23                                                                                                                  |
| Margolis (1988)                           | rct (cluster) | 1 1 1 1 0 1 1 0 1 1                                                                                                                                                                                                                                                                                                                                                                                                                                                                                                                                                                                                                                                                                                                                                                                                                                                                                                                                                                                                                                                                                                                                                                                                                                                                                                                                                                                                                                                                                          | 1 1 1    | 0 0 1 1 1 1 1            | 0 1 0 0 9 1 1 | 0 8 3 4 2 0 17                                                                                                                   |
| Margolis (1992)                           | cba (cluster) | 1 1 1 1 0 1 1 0 1 0                                                                                                                                                                                                                                                                                                                                                                                                                                                                                                                                                                                                                                                                                                                                                                                                                                                                                                                                                                                                                                                                                                                                                                                                                                                                                                                                                                                                                                                                                          | 1 1 1    | 0 1 1 1 1 1 1            | 1 1 0 0 9 1 1 | 0 7 3 6 3 0 19                                                                                                                   |
| Morrissey (1995)                          | rct           | 1 1 1 1 2 1 1 0 1 1                                                                                                                                                                                                                                                                                                                                                                                                                                                                                                                                                                                                                                                                                                                                                                                                                                                                                                                                                                                                                                                                                                                                                                                                                                                                                                                                                                                                                                                                                          | 1 0 1    | 0 1 1 1 1 1 1            | 1 1 1 1 1 1 1 | 0 10 2 5 6 0 23                                                                                                                  |
| Nichol (1990)                             | pcs (cluster) | 1 1 1 1 1 1 1 0 0 0                                                                                                                                                                                                                                                                                                                                                                                                                                                                                                                                                                                                                                                                                                                                                                                                                                                                                                                                                                                                                                                                                                                                                                                                                                                                                                                                                                                                                                                                                          | 1 1 1    | 0 1 1 1 1 1 1            | 0 1 0 0 9 0 0 | 0 7 3 6 1 0 17                                                                                                                   |
| Shah (2006)                               | pcs (cluster) | 1 1 1 1 2 1 1 0 0 1                                                                                                                                                                                                                                                                                                                                                                                                                                                                                                                                                                                                                                                                                                                                                                                                                                                                                                                                                                                                                                                                                                                                                                                                                                                                                                                                                                                                                                                                                          | 1 1 1    | 0 0 1 1 1 1 1            | 0 1 0 0 1 0 0 | 0 10 3 4 4 0 21                                                                                                                  |
| Tierney (2005)                            | rct (cluster) | 1 1 1 1 1 1 0 0 1 0                                                                                                                                                                                                                                                                                                                                                                                                                                                                                                                                                                                                                                                                                                                                                                                                                                                                                                                                                                                                                                                                                                                                                                                                                                                                                                                                                                                                                                                                                          | 1 0 1    | 1 1 1 1 1 1 1            | 1 1 1 1 1 1 1 | 0 7 2 7 6 0 22                                                                                                                   |
| Total Downs and Black summary score (/32) |               |                                                                                                                                                                                                                                                                                                                                                                                                                                                                                                                                                                                                                                                                                                                                                                                                                                                                                                                                                                                                                                                                                                                                                                                                                                                                                                                                                                                                                                                                                                              |          |                          |               |                                                                                                                                  |

Exhibit B.1.11. Influenza vaccinations – Team change (continued)

| Study ID               | Design        | Adequate sequence generation | Allocation concealment | Blinding (or accurate outcome assessment) | Incomplete outcome data addressed | Free of other bias (i.e.: contamination effects) | Free of ROB issues |
|------------------------|---------------|------------------------------|------------------------|-------------------------------------------|-----------------------------------|--------------------------------------------------|--------------------|
| Arthur (2002)          | rct (cluster) | 1                            | 1                      | 0                                         | 1                                 | 1                                                | 0                  |
| Beck (1997)            | cct           | 1                            | 0                      | 1                                         | 0                                 | 0                                                | 0                  |
| Berg (2005)            | rct           | NRS                          | NRS                    | 1                                         | 1                                 | 0                                                | NRS                |
| Berg (2008)            | rct (cluster) | 1                            | 1                      | 1                                         | 1                                 | 1                                                | 1                  |
| Black (1993)           | cct           | 1                            | 0                      | 1                                         | 1                                 | 0                                                | 0                  |
| Dalby (2000)           | rct           | 1                            | 1                      | 1                                         | 0                                 | 0                                                | 0                  |
| Garcia-Aymerich (2007) | rct           | 1                            | 1                      | 1                                         | 0                                 | 0                                                | 0                  |
| Goebel (2005)          | rct (cluster) | NRS                          | NRS                    | 1                                         | 1                                 | 1                                                | NRS                |
| Grabenstein (2001)     | rct (cluster) | NRS                          | NRS                    | 1                                         | 0                                 | 1                                                | NRS                |
| Herman (1994)          | rct (cluster) | 1                            | 1                      | 1                                         | 1                                 | 1                                                | 1                  |
| Hermiz (2002)          | cct           | 1                            | 0                      | 0                                         | 1                                 | 0                                                | 0                  |
| Johnson (2005)         | rct           | NRS                          | NRS                    | 1                                         | 1                                 | 0                                                | NRS                |
| Kim (1999)             | rct (cluster) | 1                            | 1                      | 0                                         | 1                                 | 1                                                | 0                  |
| Margolis (1988)        | rct (cluster) | NRS                          | NRS                    | 0                                         | 1                                 | 1                                                | NRS                |
| Margolis (1992)        | rct (cluster) | NRS                          | NRS                    | 1                                         | 1                                 | 1                                                | NRS                |
| Morrissey (1995)       | rct           | 1                            | 1                      | 1                                         | 1                                 | 0                                                | 0                  |
| Nichol (1990)          | rct (cluster) | NRS                          | NRS                    | 1                                         | 0                                 | 1                                                | NRS                |
| Shah (2006)            | rct (cluster) | NRS                          | NRS                    | 0                                         | 0                                 | 1                                                | NRS                |
| Tierney (2005)         | rct (cluster) | 1                            | 1                      | 1                                         | 1                                 | 1                                                | 1                  |

Exhibit B.1.12. Influenza vaccinations – Visit structure change

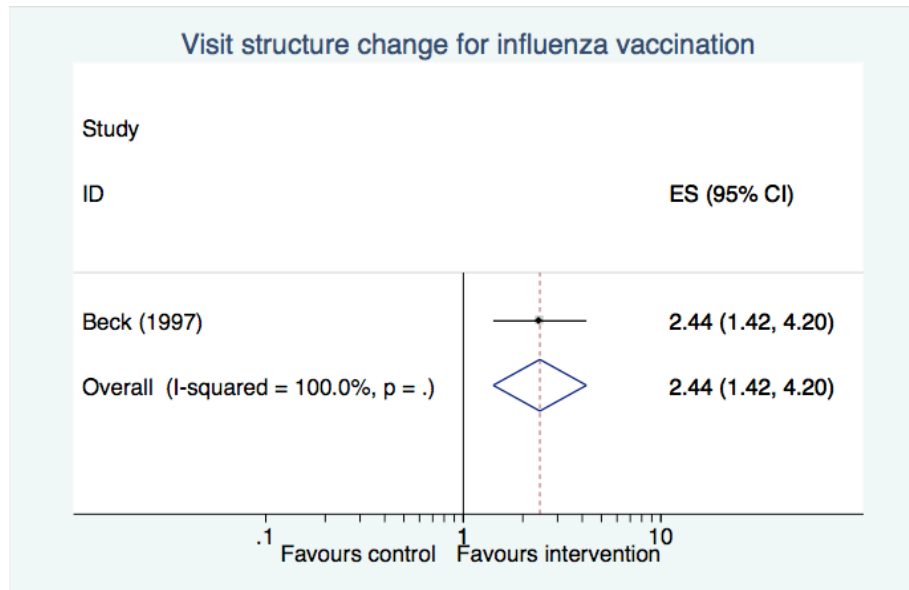

| Study ID    | Design | Reporting           | validity | Internal validity - bias | confounding | Summary scores |
|-------------|--------|---------------------|----------|--------------------------|-------------|----------------|
| Beck (1997) | cct    | 1 1 1 1 2 1 1 0 0 1 | 1 0 1    | 0 1 1 1 1 1 1 1 1 1      | 1 1 1 1 0 1 | 9 2 6 4 0 21   |

| Study ID    | Design | Adequate sequence generation | Allocation concealment | Blinding (or accurate outcome assessment) | Incomplete outcome data addressed | Free of other bias (i.e.: contamination effects) | Free of ROB issues |
|-------------|--------|------------------------------|------------------------|-------------------------------------------|-----------------------------------|--------------------------------------------------|--------------------|
| Beck (1997) | cct    | 1                            | 0                      | 1                                         | 0                                 | 0                                                | 0                  |

Exhibit B.2. Forest plots and study quality – Pneumococcal vaccinations  
 Exhibit B.2.1. Pneumococcal vaccinations – Audit and feedback

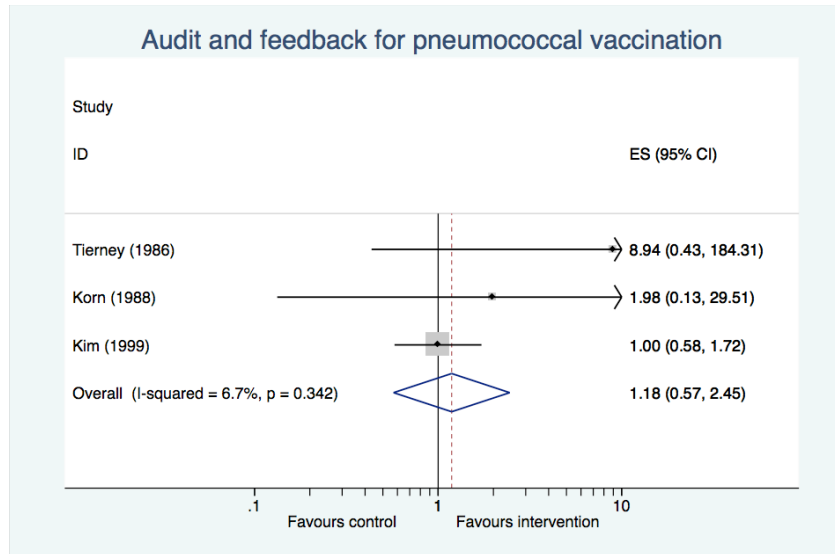

| Study ID       | Design        | Reporting                     |                                        |                                       |                                     |                                                      |                             |                                                                |                                                     |                                                             |                                      | validity                                                            |                                                                           |                                                                      | Internal validity - bias                                   |                                                          |                                                               |                                                           |                                    | confounding                                   |                                                  |                                                                  |                                                                       |                                | Summary scores                                                              |                                          |                                             |                                 |                 |                        |                               |                                      |            |                                           |
|----------------|---------------|-------------------------------|----------------------------------------|---------------------------------------|-------------------------------------|------------------------------------------------------|-----------------------------|----------------------------------------------------------------|-----------------------------------------------------|-------------------------------------------------------------|--------------------------------------|---------------------------------------------------------------------|---------------------------------------------------------------------------|----------------------------------------------------------------------|------------------------------------------------------------|----------------------------------------------------------|---------------------------------------------------------------|-----------------------------------------------------------|------------------------------------|-----------------------------------------------|--------------------------------------------------|------------------------------------------------------------------|-----------------------------------------------------------------------|--------------------------------|-----------------------------------------------------------------------------|------------------------------------------|---------------------------------------------|---------------------------------|-----------------|------------------------|-------------------------------|--------------------------------------|------------|-------------------------------------------|
|                |               | 1. Study aim clearly defined? | 2. Main outcomes described in methods? | 3. Patient characteristics described? | 4. Interventions clearly described? | 5. Distributions of principal confounders described? | 6. Main findings described? | 7. Estimates of random variability provided for main outcomes? | 8. All important potential adverse events reported? | 9. Characteristics of patients lost to follow-up described? | 10. Actual p-values values reported? | 11. Subjects asked to participate represented of entire population? | 12. Subjects prepared to participate representative of entire population? | 13. Staff, places, and facilities representative of usual treatment? | 14. Attempt made to blind study subjects to interventions? | 15. Attempt made to blind those measuring main outcomes? | 16. If results were based on "data dredging", was this clear? | 17. Analyses adjusted for different lengths of follow-up? | 18. Statistical tests appropriate? | 19. Compliance with intervention(s) reliable? | 20. Main outcomes accurate (valid and reliable)? | 21. Patients in different groups recruited from same population? | 22. Patients in different groups recruited over the same time period? | 23. Study subjects randomized? | 24. Randomization assignment concealed from patients and health care staff? | 25. Adequate adjustment for confounding? | 26. Losses to follow-up taken into account? | 27. Study sufficiently powered? | Reporting (/11) | External validity (/3) | Internal validity - bias (/7) | Internal validity - confounding (/6) | Power (/5) | Total Downs and Black summary score (/32) |
| Kim (1999)     | rct (cluster) | 1                             | 1                                      | 1                                     | 1                                   | 2                                                    | 1                           | 1                                                              | 0                                                   | 1                                                           | 1                                    | 1                                                                   | 0                                                                         | 1                                                                    | 1                                                          | 0                                                        | 1                                                             | 1                                                         | 1                                  | 1                                             | 0                                                | 1                                                                | 1                                                                     | 1                              | 1                                                                           | 1                                        | 1                                           | 0                               | 10              | 2                      | 5                             | 6                                    | 0          | 23                                        |
| Korn (1988)    | pcs (cluster) | 1                             | 1                                      | 1                                     | 1                                   | 1                                                    | 1                           | 1                                                              | 0                                                   | 1                                                           | 0                                    | 1                                                                   | 1                                                                         | 1                                                                    | 1                                                          | 1                                                        | 1                                                             | 1                                                         | 0                                  | 1                                             | 0                                                | 1                                                                | 1                                                                     | 0                              | 0                                                                           | 1                                        | 1                                           | 0                               | 8               | 3                      | 5                             | 4                                    | 0          | 20                                        |
| Tierney (1986) | rct (cluster) | 1                             | 1                                      | 0                                     | 1                                   | 0                                                    | 1                           | 0                                                              | 0                                                   | 1                                                           | 0                                    | 1                                                                   | 1                                                                         | 1                                                                    | 1                                                          | 0                                                        | 1                                                             | 1                                                         | 1                                  | 1                                             | 1                                                | 1                                                                | 1                                                                     | 1                              | 1                                                                           | 9                                        | 1                                           | 0                               | 5               | 3                      | 6                             | 5                                    | 0          | 19                                        |

  

| Study ID       | Design        | Adequate sequence generation | Allocation concealment | Blinding (or accurate outcome assessment) | Incomplete outcome data addressed | Free of other bias (i.e.: contamination effects) | Free of ROB issues |
|----------------|---------------|------------------------------|------------------------|-------------------------------------------|-----------------------------------|--------------------------------------------------|--------------------|
| Kim (1999)     | rct (cluster) | 1                            | 1                      | 0                                         | 1                                 | 1                                                | 0                  |
| Korn (1988)    | pcs (cluster) | NRS                          | NRS                    | 1                                         | 1                                 | 1                                                | NRS                |
| Tierney (1986) | rct (cluster) | 1                            | 1                      | 1                                         | 1                                 | 1                                                | 1                  |

Exhibit B.2.2. Pneumococcal vaccinations – Case management

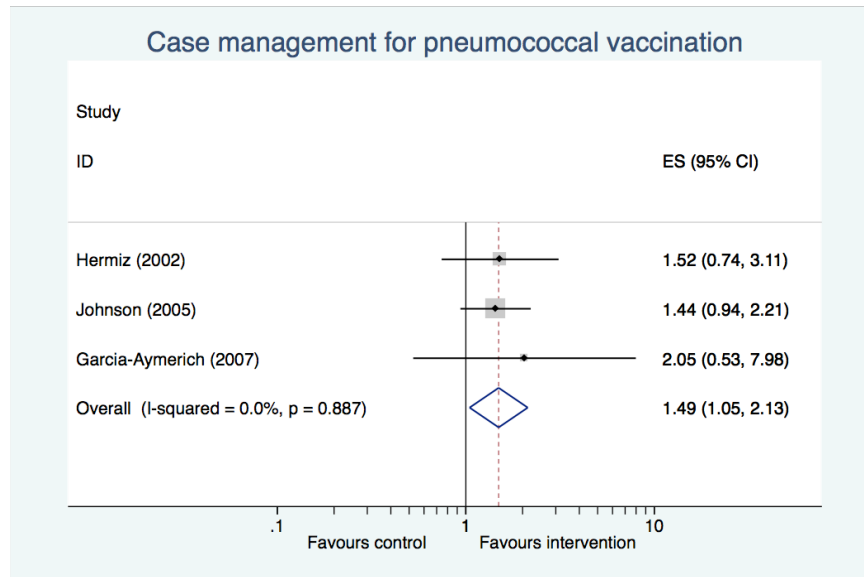

| Study ID               | Design | Reporting                                                                                                                                                                                                                                                                                                                                                                                                                                                                      | validity                                                                                                                                                                                                                 | Internal validity - bias                                                                                                                                                                                                                                                                                                                                                                        | confounding                                                                                                                                                                                                                                                                                                                                                                              | Summary scores                                                                                                                                                                |
|------------------------|--------|--------------------------------------------------------------------------------------------------------------------------------------------------------------------------------------------------------------------------------------------------------------------------------------------------------------------------------------------------------------------------------------------------------------------------------------------------------------------------------|--------------------------------------------------------------------------------------------------------------------------------------------------------------------------------------------------------------------------|-------------------------------------------------------------------------------------------------------------------------------------------------------------------------------------------------------------------------------------------------------------------------------------------------------------------------------------------------------------------------------------------------|------------------------------------------------------------------------------------------------------------------------------------------------------------------------------------------------------------------------------------------------------------------------------------------------------------------------------------------------------------------------------------------|-------------------------------------------------------------------------------------------------------------------------------------------------------------------------------|
|                        |        | 1. Study aim clearly defined?<br>2. Main outcomes described in methods?<br>3. Patient characteristics described?<br>4. Interventions clearly described?<br>5. Distributions of principal confounders described?<br>6. Main findings described?<br>7. Estimates of random variability provided for main outcomes?<br>8. All important potential adverse events reported?<br>9. Characteristics of patients lost to follow-up described?<br>10. Actual p-values values reported? | 11. Subjects asked to participate represented of entire population?<br>12. Subjects prepared to participate representative of entire population?<br>13. Staff, places, and facilities representative of usual treatment? | 14. Attempt made to blind study subjects to interventions?<br>15. Attempt made to blind those measuring main outcomes?<br>16. If results were based on "data dredging", was this clear?<br>17. Analyses adjusted for different lengths of follow-up?<br>18. Statistical tests appropriate?<br>19. Compliance with intervention(s) reliable?<br>20. Main outcomes accurate (valid and reliable)? | 21. Patients in different groups recruited from same population?<br>22. Patients in different groups recruited over the same time period?<br>23. Study subjects randomized?<br>24. Randomization assignment concealed from patients and health care staff?<br>25. Adequate adjustment for confounding?<br>26. Losses to follow-up taken into account?<br>27. Study sufficiently powered? | Reporting (/11)<br>External validity (/3)<br>Internal validity - bias (/7)<br>Internal validity - confounding (/6)<br>Power (/5)<br>Total Downs and Black summary score (/32) |
| Garcia-Aymerich (2007) | rct    | 1 1 1 1 2 1 1 0 1 1                                                                                                                                                                                                                                                                                                                                                                                                                                                            | 1 1 1                                                                                                                                                                                                                    | 0 1 1 1 1 1 0                                                                                                                                                                                                                                                                                                                                                                                   | 1 1 1 1 1 0                                                                                                                                                                                                                                                                                                                                                                              | 10 3 5 5 0 23                                                                                                                                                                 |
| Hermiz (2002)          | cct    | 1 1 1 1 1 1 1 0 1 1                                                                                                                                                                                                                                                                                                                                                                                                                                                            | 1 0 1                                                                                                                                                                                                                    | 0 0 1 1 1 1 0                                                                                                                                                                                                                                                                                                                                                                                   | 1 1 1 0 1 1 0                                                                                                                                                                                                                                                                                                                                                                            | 9 2 4 5 0 20                                                                                                                                                                  |
| Johnson (2005)         | rcs    | 1 1 1 1 2 1 1 0 1 1                                                                                                                                                                                                                                                                                                                                                                                                                                                            | 0 0 1                                                                                                                                                                                                                    | 0 1 1 1 1 1 1                                                                                                                                                                                                                                                                                                                                                                                   | 1 1 0 0 1 1 0                                                                                                                                                                                                                                                                                                                                                                            | 10 1 6 4 0 21                                                                                                                                                                 |

| Study ID               | Design | Adequate sequence generation | Allocation concealment | Blinding (or accurate outcome assessment) | Incomplete outcome data addressed | Free of other bias (i.e.: contamination effects) | Free of ROB issues |
|------------------------|--------|------------------------------|------------------------|-------------------------------------------|-----------------------------------|--------------------------------------------------|--------------------|
| Garcia-Aymerich (2007) | rct    | 1                            | 1                      | 1                                         | 0                                 | 0                                                | 0                  |
| Hermiz (2002)          | cct    | 1                            | 0                      | 0                                         | 1                                 | 0                                                | 0                  |
| Johnson (2005)         | rcs    | NRS                          | NRS                    | 1                                         | 1                                 | 0                                                | NRS                |

Exhibit B.2.3. Pneumococcal vaccinations – Clinician education

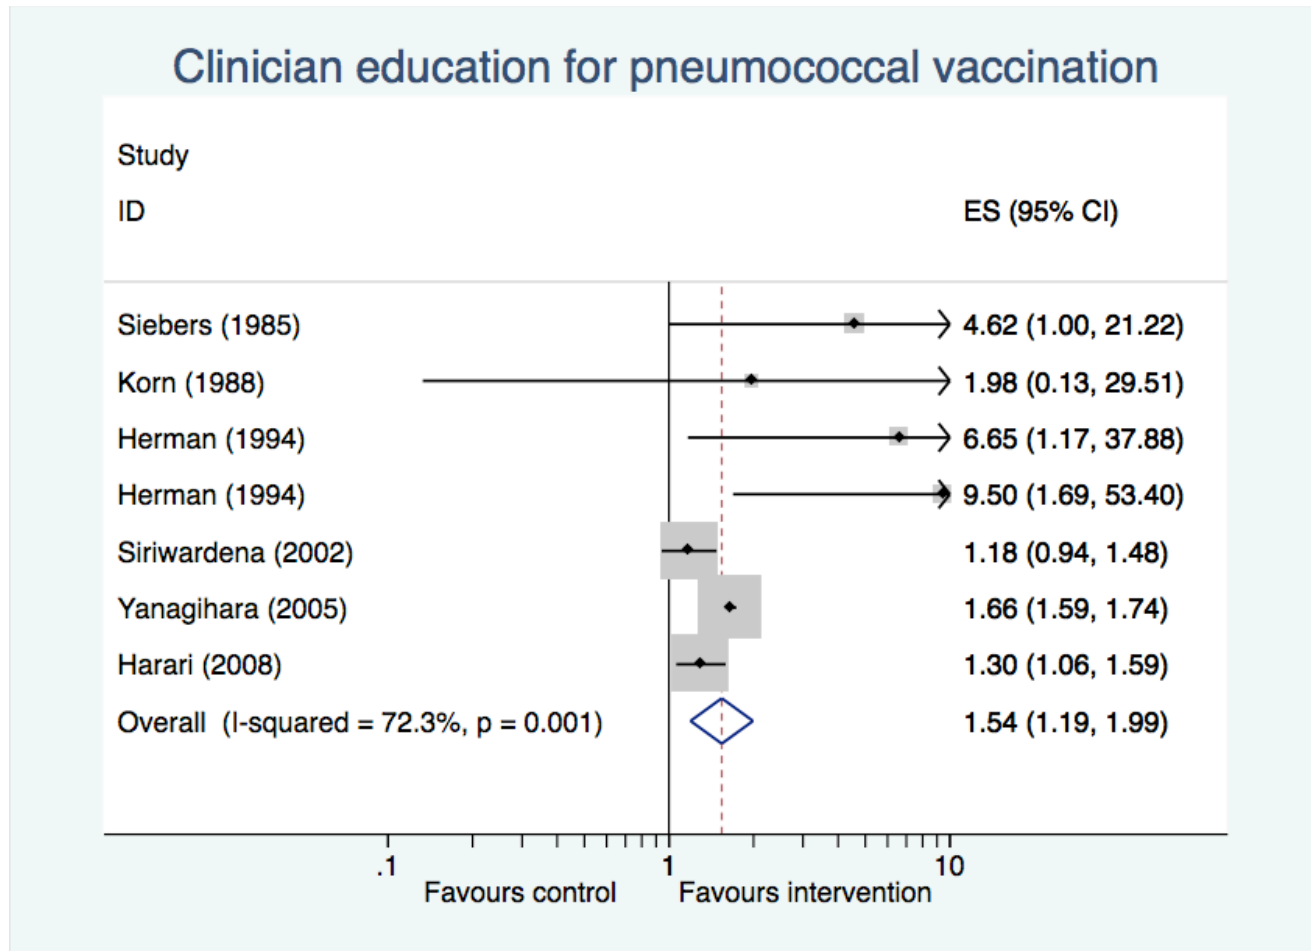



Exhibit B.2.3. Pneumococcal vaccinations – Clinician education (continued)

| Study ID           | Design        | Reporting                                                                                                                                                                                                                                                                                                                                                                                                                                                                                                                                                                                                                                                                                                                                                                                                                                                                                                                                                                                                                                                                                                                                                                                                                                                                                                                                                                                                                                                                                                    | validity | Internal validity - bias | confounding   | Summary scores                                                                                                                                                                |
|--------------------|---------------|--------------------------------------------------------------------------------------------------------------------------------------------------------------------------------------------------------------------------------------------------------------------------------------------------------------------------------------------------------------------------------------------------------------------------------------------------------------------------------------------------------------------------------------------------------------------------------------------------------------------------------------------------------------------------------------------------------------------------------------------------------------------------------------------------------------------------------------------------------------------------------------------------------------------------------------------------------------------------------------------------------------------------------------------------------------------------------------------------------------------------------------------------------------------------------------------------------------------------------------------------------------------------------------------------------------------------------------------------------------------------------------------------------------------------------------------------------------------------------------------------------------|----------|--------------------------|---------------|-------------------------------------------------------------------------------------------------------------------------------------------------------------------------------|
|                    |               | 1. Study aim clearly defined?<br>2. Main outcomes described in methods?<br>3. Patient characteristics described?<br>4. Interventions clearly described?<br>5. Distributions of principal confounders described?<br>6. Main findings described?<br>7. Estimates of random variability provided for main outcomes?<br>8. All important potential adverse events reported?<br>9. Characteristics of patients lost to follow-up described?<br>10. Actual p-values values reported?<br>11. Subjects asked to participate representative of entire population?<br>12. Subjects prepared to participate representative of entire population?<br>13. Staff, places, and facilities representative of usual treatment?<br>14. Attempt made to blind study subjects to interventions?<br>15. Attempt made to blind those measuring main outcomes?<br>16. If results were based on "data dredging", was this clear?<br>17. Analyses adjusted for different lengths of follow-up?<br>18. Statistical tests appropriate?<br>19. Compliance with intervention(s) reliable?<br>20. Main outcomes accurate (valid and reliable)?<br>21. Patients in different groups recruited from same population?<br>22. Patients in different groups recruited over the same time period?<br>23. Study subjects randomized?<br>24. Randomization assignment concealed from patients and health care staff?<br>25. Adequate adjustment for confounding?<br>26. Losses to follow-up taken into account?<br>27. Study sufficiently powered? |          |                          |               | Reporting (/11)<br>External validity (/3)<br>Internal validity - bias (/7)<br>Internal validity - confounding (/6)<br>Power (/5)<br>Total Downs and Black summary score (/32) |
| Harari (2008)      | rct           | 1 1 1 1 2 1 1 0 0 1                                                                                                                                                                                                                                                                                                                                                                                                                                                                                                                                                                                                                                                                                                                                                                                                                                                                                                                                                                                                                                                                                                                                                                                                                                                                                                                                                                                                                                                                                          | 1 1 1    | 0 0 1 1 1 1 0            | 1 1 1 1 1 0   | 9 3 4 4 0 20                                                                                                                                                                  |
| Herman (1994)      | rct (cluster) | 1 1 1 1 2 1 1 0 1 1                                                                                                                                                                                                                                                                                                                                                                                                                                                                                                                                                                                                                                                                                                                                                                                                                                                                                                                                                                                                                                                                                                                                                                                                                                                                                                                                                                                                                                                                                          | 1 1 1    | 0 0 1 1 1 1 1            | 1 1 1 1 1 1 0 | 10 3 5 6 0 24                                                                                                                                                                 |
| Korn (1988)        | pcs (cluster) | 1 1 1 1 1 1 1 0 1 0                                                                                                                                                                                                                                                                                                                                                                                                                                                                                                                                                                                                                                                                                                                                                                                                                                                                                                                                                                                                                                                                                                                                                                                                                                                                                                                                                                                                                                                                                          | 1 1 1    | 1 1 1 1 0 1 0            | 1 1 0 0 1 1 0 | 8 3 5 4 0 20                                                                                                                                                                  |
| Siebers (1985)     | cct           | 1 1 1 1 1 1 1 0 1 0                                                                                                                                                                                                                                                                                                                                                                                                                                                                                                                                                                                                                                                                                                                                                                                                                                                                                                                                                                                                                                                                                                                                                                                                                                                                                                                                                                                                                                                                                          | 1 1 1    | 0 0 1 1 1 1 0            | 1 1 1 0 1 1 0 | 7 3 4 5 0 19                                                                                                                                                                  |
| Siriwardena (2002) | rct (cluster) | 1 1 1 1 2 1 1 0 1 1                                                                                                                                                                                                                                                                                                                                                                                                                                                                                                                                                                                                                                                                                                                                                                                                                                                                                                                                                                                                                                                                                                                                                                                                                                                                                                                                                                                                                                                                                          | 1 1 1    | 1 0 1 1 1 1 0            | 1 1 1 1 1 1 1 | 2 10 3 5 6 2 26                                                                                                                                                               |
| Yanagihara (2005)  | pcs           | 1 1 1 1 0 1 1 0 1 1                                                                                                                                                                                                                                                                                                                                                                                                                                                                                                                                                                                                                                                                                                                                                                                                                                                                                                                                                                                                                                                                                                                                                                                                                                                                                                                                                                                                                                                                                          | 1 1 1    | 0 1 1 1 1 1 1            | 0 1 0 0 9 1 0 | 8 3 6 2 0 19                                                                                                                                                                  |

| Study ID           | Design        | Adequate sequence generation | Allocation concealment | Blinding (or accurate outcome assessment) | Incomplete outcome data addressed | Free of other bias (i.e.: contamination effects) | Free of ROB issues |
|--------------------|---------------|------------------------------|------------------------|-------------------------------------------|-----------------------------------|--------------------------------------------------|--------------------|
| Harari (2008)      | rct           | 1                            | 1                      | 0                                         | 0                                 | 0                                                | 0                  |
| Herman (1994)      | rct (cluster) | 1                            | 1                      | 1                                         | 1                                 | 1                                                | 1                  |
| Korn (1988)        | pcs (cluster) | NRS                          | NRS                    | 1                                         | 1                                 | 1                                                | NRS                |
| Siebers (1985)     | cct           | 1                            | 0                      | 0                                         | 1                                 | 0                                                | 0                  |
| Siriwardena (2002) | rct (cluster) | 1                            | 1                      | 0                                         | 1                                 | 1                                                | 0                  |
| Yanagihara (2005)  | pcs           | NRS                          | NRS                    | 1                                         | 1                                 | 0                                                | NRS                |

Exhibit B.2.4. Pneumococcal vaccinations – Clinician reminders

## Clinician reminders for PPV

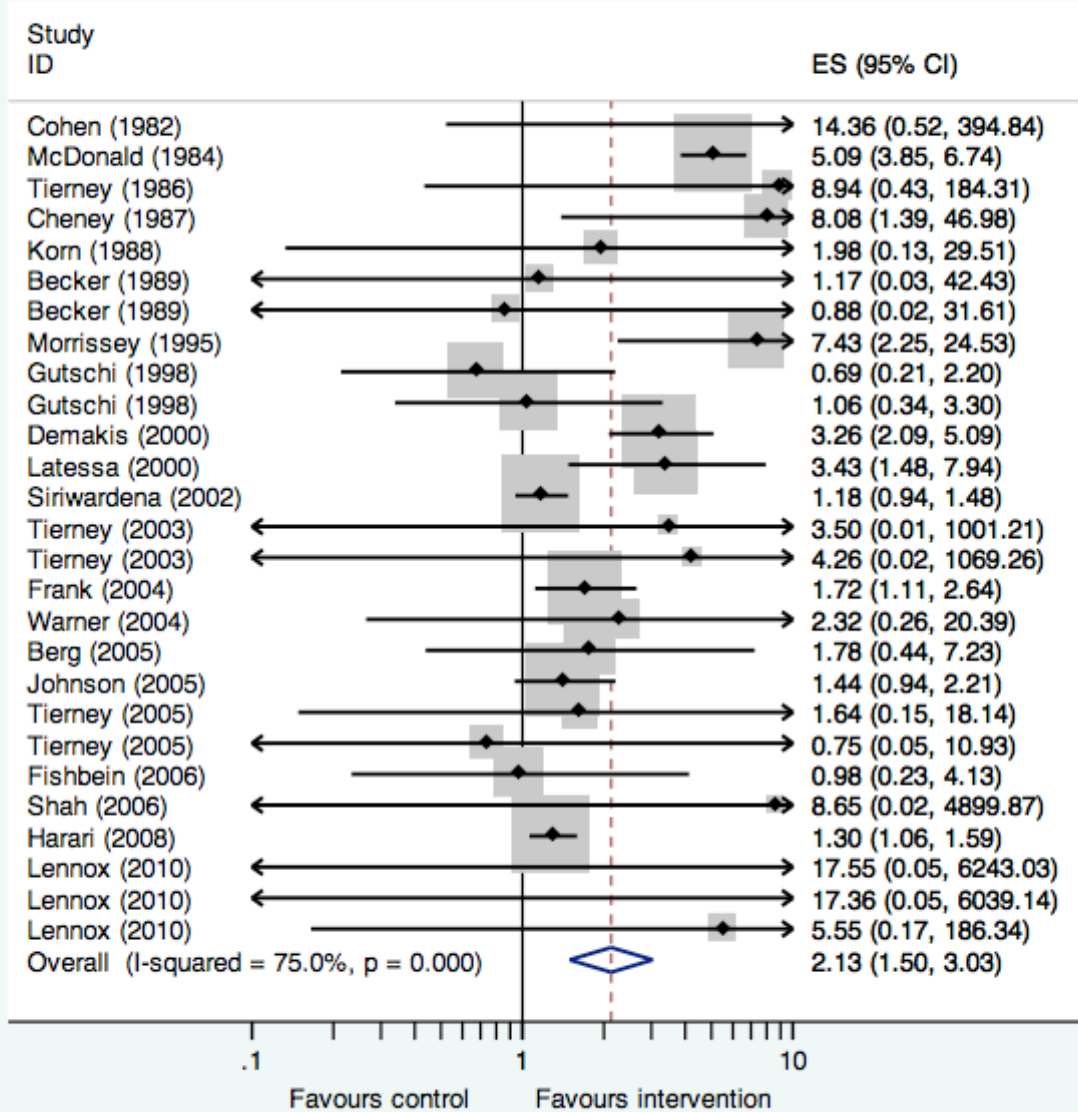

Exhibit B.2.4. Pneumococcal vaccinations – Clinician reminders (continued)

| Study ID           | Design        | Reporting                                                                                                                                                                                                                                                                                                                                                                                                                                                                      | validity                                                                                                                                                                                                                 | Internal validity - bias                                                                                                                                                                                                                                                                                                                                                                        | confounding                                                                                                                                                                                                                                                                                                                                                                              | Summary scores                                                                                                                   |
|--------------------|---------------|--------------------------------------------------------------------------------------------------------------------------------------------------------------------------------------------------------------------------------------------------------------------------------------------------------------------------------------------------------------------------------------------------------------------------------------------------------------------------------|--------------------------------------------------------------------------------------------------------------------------------------------------------------------------------------------------------------------------|-------------------------------------------------------------------------------------------------------------------------------------------------------------------------------------------------------------------------------------------------------------------------------------------------------------------------------------------------------------------------------------------------|------------------------------------------------------------------------------------------------------------------------------------------------------------------------------------------------------------------------------------------------------------------------------------------------------------------------------------------------------------------------------------------|----------------------------------------------------------------------------------------------------------------------------------|
|                    |               | 1. Study aim clearly defined?<br>2. Main outcomes described in methods?<br>3. Patient characteristics described?<br>4. Interventions clearly described?<br>5. Distributions of principal confounders described?<br>6. Main findings described?<br>7. Estimates of random variability provided for main outcomes?<br>8. All important potential adverse events reported?<br>9. Characteristics of patients lost to follow-up described?<br>10. Actual p-values values reported? | 11. Subjects asked to participate represented of entire population?<br>12. Subjects prepared to participate representative of entire population?<br>13. Staff, places, and facilities representative of usual treatment? | 14. Attempt made to blind study subjects to interventions?<br>15. Attempt made to blind those measuring main outcomes?<br>16. If results were based on "data dredging", was this clear?<br>17. Analyses adjusted for different lengths of follow-up?<br>18. Statistical tests appropriate?<br>19. Compliance with intervention(s) reliable?<br>20. Main outcomes accurate (valid and reliable)? | 21. Patients in different groups recruited from same population?<br>22. Patients in different groups recruited over the same time period?<br>23. Study subjects randomized?<br>24. Randomization assignment concealed from patients and health care staff?<br>25. Adequate adjustment for confounding?<br>26. Losses to follow-up taken into account?<br>27. Study sufficiently powered? | Reporting (/11)<br>External validity (/3)<br>Internal validity - bias (/7)<br>Internal validity - confounding (/6)<br>Power (/5) |
| Becker (1989)      | cct           | 1 1 1 1 1 1 1 1 0 1 1                                                                                                                                                                                                                                                                                                                                                                                                                                                          | 1 0 1                                                                                                                                                                                                                    | 0 0 1 1 1 1 0                                                                                                                                                                                                                                                                                                                                                                                   | 1 1 1 0 1 0                                                                                                                                                                                                                                                                                                                                                                              | 0 9 2 4 4 0                                                                                                                      |
| Berg (2005)        | rcs           | 1 1 1 1 2 1 1 0 1 1                                                                                                                                                                                                                                                                                                                                                                                                                                                            | 1 1 1                                                                                                                                                                                                                    | 0 1 1 1 1 1 1                                                                                                                                                                                                                                                                                                                                                                                   | 1 1 0 0 1 1                                                                                                                                                                                                                                                                                                                                                                              | 0 10 3 5 4 0                                                                                                                     |
| Cheney (1987)      | rct           | 1 1 1 1 0 1 1 0 1 0                                                                                                                                                                                                                                                                                                                                                                                                                                                            | 1 1 1                                                                                                                                                                                                                    | 1 0 1 1 1 1 0                                                                                                                                                                                                                                                                                                                                                                                   | 1 1 1 1 9 1                                                                                                                                                                                                                                                                                                                                                                              | 0 7 3 5 5 0                                                                                                                      |
| Cohen (1982)       | rct (cluster) | 1 1 1 1 0 1 1 0 1 1                                                                                                                                                                                                                                                                                                                                                                                                                                                            | 1 1 1                                                                                                                                                                                                                    | 1 0 1 1 1 1 0                                                                                                                                                                                                                                                                                                                                                                                   | 1 1 1 1 9 1                                                                                                                                                                                                                                                                                                                                                                              | 0 8 3 5 5 0                                                                                                                      |
| Demakis (2000)     | rct (cluster) | 1 1 1 1 1 1 1 0 1 1                                                                                                                                                                                                                                                                                                                                                                                                                                                            | 1 1 1                                                                                                                                                                                                                    | 1 1 1 1 1 1 1                                                                                                                                                                                                                                                                                                                                                                                   | 1 1 1 1 1 1                                                                                                                                                                                                                                                                                                                                                                              | 0 9 3 7 6 0                                                                                                                      |
| Fishbein (2006)    | cba           | 1 1 1 1 1 1 1 0 1 0                                                                                                                                                                                                                                                                                                                                                                                                                                                            | 1 1 1                                                                                                                                                                                                                    | 0 0 1 1 1 1 0                                                                                                                                                                                                                                                                                                                                                                                   | 1 1 0 0 9 1                                                                                                                                                                                                                                                                                                                                                                              | 0 8 3 4 3 0                                                                                                                      |
| Frank (2004)       | cct           | 1 1 1 1 1 1 1 0 1 1                                                                                                                                                                                                                                                                                                                                                                                                                                                            | 1 1 1                                                                                                                                                                                                                    | 1 1 1 1 1 1 1                                                                                                                                                                                                                                                                                                                                                                                   | 1 1 1 0 9 1                                                                                                                                                                                                                                                                                                                                                                              | 0 9 3 7 4 0                                                                                                                      |
| Gutschi (1998)     | cct           | 1 1 1 1 2 1 1 0 1 1                                                                                                                                                                                                                                                                                                                                                                                                                                                            | 1 1 1                                                                                                                                                                                                                    | 0 0 1 1 1 1 0                                                                                                                                                                                                                                                                                                                                                                                   | 1 1 1 0 0 1                                                                                                                                                                                                                                                                                                                                                                              | 0 10 3 3 4 0                                                                                                                     |
| Harari (2008)      | rct           | 1 1 1 1 2 1 1 0 0 1                                                                                                                                                                                                                                                                                                                                                                                                                                                            | 1 1 1                                                                                                                                                                                                                    | 0 0 1 1 1 1 0                                                                                                                                                                                                                                                                                                                                                                                   | 1 1 1 1 1 0                                                                                                                                                                                                                                                                                                                                                                              | 0 9 3 4 4 0                                                                                                                      |
| Johnson (2005)     | rcs           | 1 1 1 1 2 1 1 0 1 1                                                                                                                                                                                                                                                                                                                                                                                                                                                            | 0 0 1                                                                                                                                                                                                                    | 0 1 1 1 1 1 1                                                                                                                                                                                                                                                                                                                                                                                   | 1 1 0 0 1 1                                                                                                                                                                                                                                                                                                                                                                              | 0 10 1 6 4 0                                                                                                                     |
| Korn (1988)        | pct (cluster) | 1 1 1 1 1 1 1 0 1 0                                                                                                                                                                                                                                                                                                                                                                                                                                                            | 1 1 1                                                                                                                                                                                                                    | 1 1 1 1 0 1 0                                                                                                                                                                                                                                                                                                                                                                                   | 1 1 0 0 1 1                                                                                                                                                                                                                                                                                                                                                                              | 0 8 3 5 4 0                                                                                                                      |
| Latessa (2000)     | cba (cluster) | 1 1 1 1 2 1 1 0 1 1                                                                                                                                                                                                                                                                                                                                                                                                                                                            | 1 1 1                                                                                                                                                                                                                    | 0 0 1 1 1 1 0                                                                                                                                                                                                                                                                                                                                                                                   | 1 1 0 0 0 1                                                                                                                                                                                                                                                                                                                                                                              | 0 10 3 4 3 0                                                                                                                     |
| Lennox (2010)      | rct (cluster) | 1 0 1 1 2 1 1 1 1 1                                                                                                                                                                                                                                                                                                                                                                                                                                                            | 1 0 1                                                                                                                                                                                                                    | 0 1 1 1 1 1 1                                                                                                                                                                                                                                                                                                                                                                                   | 1 1 1 1 1 1                                                                                                                                                                                                                                                                                                                                                                              | 0 10 2 6 6 0                                                                                                                     |
| McDonald (1984)    | rct (cluster) | 1 1 1 1 0 1 1 0 1 1                                                                                                                                                                                                                                                                                                                                                                                                                                                            | 1 1 1                                                                                                                                                                                                                    | 1 1 1 1 1 1 1                                                                                                                                                                                                                                                                                                                                                                                   | 1 1 1 1 9 1                                                                                                                                                                                                                                                                                                                                                                              | 0 8 3 7 5 0                                                                                                                      |
| Morrissey (1995)   | rct           | 1 1 1 1 2 1 1 0 1 1                                                                                                                                                                                                                                                                                                                                                                                                                                                            | 1 0 1                                                                                                                                                                                                                    | 0 1 1 1 1 1 0                                                                                                                                                                                                                                                                                                                                                                                   | 1 1 1 1 1 1                                                                                                                                                                                                                                                                                                                                                                              | 0 10 2 5 6 0                                                                                                                     |
| Shah (2006)        | pcs (cluster) | 1 1 1 1 2 1 1 0 0 1                                                                                                                                                                                                                                                                                                                                                                                                                                                            | 1 1 1                                                                                                                                                                                                                    | 0 0 1 1 1 1 0                                                                                                                                                                                                                                                                                                                                                                                   | 0 1 0 0 1 0                                                                                                                                                                                                                                                                                                                                                                              | 0 10 3 4 4 0                                                                                                                     |
| Siriwardena (2002) | rct (cluster) | 1 1 1 1 2 1 1 0 1 1                                                                                                                                                                                                                                                                                                                                                                                                                                                            | 1 1 1                                                                                                                                                                                                                    | 1 0 1 1 1 1 0                                                                                                                                                                                                                                                                                                                                                                                   | 1 1 1 1 1 1                                                                                                                                                                                                                                                                                                                                                                              | 2 10 3 5 6 2                                                                                                                     |
| Tierney (1986)     | rct (cluster) | 1 1 0 1 0 1 0 0 1 0                                                                                                                                                                                                                                                                                                                                                                                                                                                            | 1 1 1                                                                                                                                                                                                                    | 1 0 1 1 1 1 1                                                                                                                                                                                                                                                                                                                                                                                   | 1 1 1 1 9 1                                                                                                                                                                                                                                                                                                                                                                              | 0 5 3 6 5 0                                                                                                                      |
| Tierney (2003)     | rct (cluster) | 1 1 1 1 1 1 1 0 1 1                                                                                                                                                                                                                                                                                                                                                                                                                                                            | 1 0 1                                                                                                                                                                                                                    | 1 1 1 1 1 1 1                                                                                                                                                                                                                                                                                                                                                                                   | 1 1 1 1 1 1                                                                                                                                                                                                                                                                                                                                                                              | 0 9 2 7 6 0                                                                                                                      |
| Tierney (2005)     | rct (cluster) | 1 1 1 1 1 1 0 0 1 0                                                                                                                                                                                                                                                                                                                                                                                                                                                            | 1 0 1                                                                                                                                                                                                                    | 1 1 1 1 1 1 1                                                                                                                                                                                                                                                                                                                                                                                   | 1 1 1 1 1 1                                                                                                                                                                                                                                                                                                                                                                              | 0 7 2 7 6 0                                                                                                                      |
| Wamer (2004)       | cba (cluster) | 1 1 1 1 0 1 1 0 1 0                                                                                                                                                                                                                                                                                                                                                                                                                                                            | 1 1 1                                                                                                                                                                                                                    | 1 0 1 1 1 1 0                                                                                                                                                                                                                                                                                                                                                                                   | 1 1 0 0 9 1                                                                                                                                                                                                                                                                                                                                                                              | 0 7 3 5 3 0                                                                                                                      |
|                    |               |                                                                                                                                                                                                                                                                                                                                                                                                                                                                                |                                                                                                                                                                                                                          |                                                                                                                                                                                                                                                                                                                                                                                                 |                                                                                                                                                                                                                                                                                                                                                                                          | Total Downs and Black summary score (/32)                                                                                        |

Exhibit B.2.4. Pneumococcal vaccinations – Clinician reminders (continued)

| Study ID           | Design        | Adequate sequence generation | Allocation concealment | Blinding (or accurate outcome assessment) | Incomplete outcome data addressed | Free of other bias (i.e.: contamination effects) | Free of ROB issues |
|--------------------|---------------|------------------------------|------------------------|-------------------------------------------|-----------------------------------|--------------------------------------------------|--------------------|
| Becker (1989)      | cct           | 1                            | 0                      | 0                                         | 0                                 | 0                                                | 0                  |
| Berg (2005)        | rcs           | NRS                          | NRS                    | 1                                         | 1                                 | 0                                                | NRS                |
| Cheney (1987)      | rct           | 1                            | 1                      | 0                                         | 1                                 | 0                                                | 0                  |
| Cohen (1982)       | rct (cluster) | 1                            | 1                      | 0                                         | 1                                 | 1                                                | 0                  |
| Demakis (2000)     | rct (cluster) | 1                            | 1                      | 1                                         | 1                                 | 1                                                | 1                  |
| Fishbein (2006)    | cba           | NRS                          | NRS                    | 0                                         | 1                                 | 0                                                | NRS                |
| Frank (2004)       | cct           | 1                            | 0                      | 1                                         | 1                                 | 0                                                | 0                  |
| Gutschi (1998)     | cct           | 1                            | 0                      | 0                                         | 1                                 | 0                                                | 0                  |
| Harari (2008)      | rct           | 1                            | 1                      | 0                                         | 0                                 | 0                                                | 0                  |
| Johnson (2005)     | rcs           | NRS                          | NRS                    | 1                                         | 1                                 | 0                                                | NRS                |
| Korn (1988)        | pcs (cluster) | NRS                          | NRS                    | 1                                         | 1                                 | 1                                                | NRS                |
| Latessa (2000)     | cba (cluster) | NRS                          | NRS                    | 0                                         | 1                                 | 1                                                | NRS                |
| Lennox (2010)      | rct (cluster) | 1                            | 1                      | 1                                         | 1                                 | 1                                                | 1                  |
| McDonald (1984)    | rct (cluster) | 1                            | 1                      | 1                                         | 1                                 | 1                                                | 1                  |
| Morrissey (1995)   | rct           | 1                            | 1                      | 1                                         | 1                                 | 0                                                | 0                  |
| Shah (2006)        | pcs (cluster) | NRS                          | NRS                    | 0                                         | 0                                 | 1                                                | NRS                |
| Siriwardena (2002) | rct (cluster) | 1                            | 1                      | 0                                         | 1                                 | 1                                                | 0                  |
| Tierney (1986)     | rct (cluster) | 1                            | 1                      | 1                                         | 1                                 | 1                                                | 1                  |
| Tierney (2003)     | rct (cluster) | 1                            | 1                      | 1                                         | 1                                 | 1                                                | 1                  |
| Tierney (2005)     | rct (cluster) | 1                            | 1                      | 1                                         | 1                                 | 1                                                | 1                  |
| Warner (2004)      | cba (cluster) | NRS                          | NRS                    | 0                                         | 1                                 | 1                                                | NRS                |

Exhibit B.2.5. Pneumococcal vaccinations – Community engagement

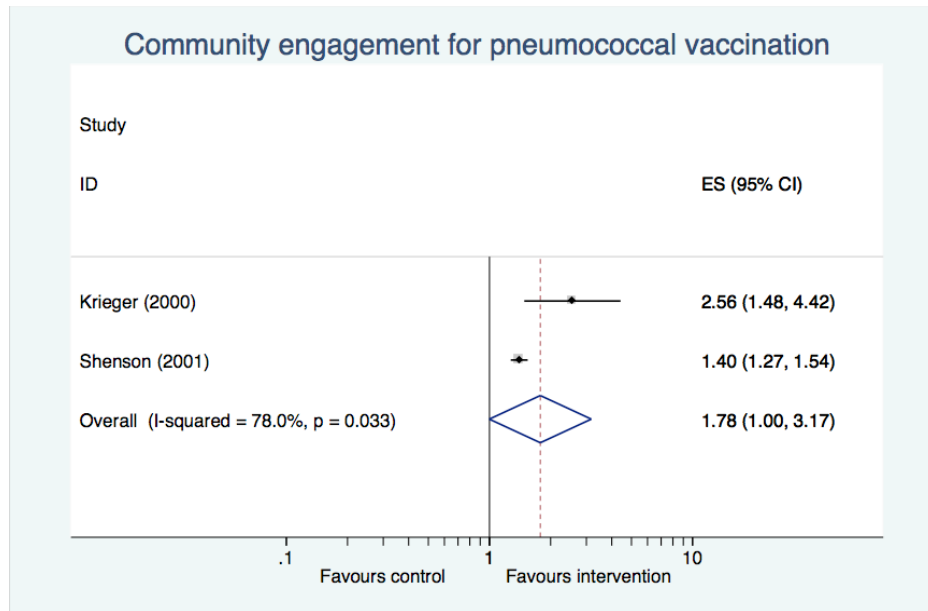

| Study ID       | Design        | Reporting                                                                                                                                                                                                                                                                                                                                                                                                                                                                      | validity                                                                                                                                                                                                                 | Internal validity - bias                                                                                                                                                                                                                                                                                                                                                                        | confounding                                                                                                                                                                                                                                                                                                                                                                              | Summary scores                                                                                                                                                                |
|----------------|---------------|--------------------------------------------------------------------------------------------------------------------------------------------------------------------------------------------------------------------------------------------------------------------------------------------------------------------------------------------------------------------------------------------------------------------------------------------------------------------------------|--------------------------------------------------------------------------------------------------------------------------------------------------------------------------------------------------------------------------|-------------------------------------------------------------------------------------------------------------------------------------------------------------------------------------------------------------------------------------------------------------------------------------------------------------------------------------------------------------------------------------------------|------------------------------------------------------------------------------------------------------------------------------------------------------------------------------------------------------------------------------------------------------------------------------------------------------------------------------------------------------------------------------------------|-------------------------------------------------------------------------------------------------------------------------------------------------------------------------------|
|                |               | 1. Study aim clearly defined?<br>2. Main outcomes described in methods?<br>3. Patient characteristics described?<br>4. Interventions clearly described?<br>5. Distributions of principal confounders described?<br>6. Main findings described?<br>7. Estimates of random variability provided for main outcomes?<br>8. All important potential adverse events reported?<br>9. Characteristics of patients lost to follow-up described?<br>10. Actual p-values values reported? | 11. Subjects asked to participate represented of entire population?<br>12. Subjects prepared to participate representative of entire population?<br>13. Staff, places, and facilities representative of usual treatment? | 14. Attempt made to blind study subjects to interventions?<br>15. Attempt made to blind those measuring main outcomes?<br>16. If results were based on "data dredging", was this clear?<br>17. Analyses adjusted for different lengths of follow-up?<br>18. Statistical tests appropriate?<br>19. Compliance with intervention(s) reliable?<br>20. Main outcomes accurate (valid and reliable)? | 21. Patients in different groups recruited from same population?<br>22. Patients in different groups recruited over the same time period?<br>23. Study subjects randomized?<br>24. Randomization assignment concealed from patients and health care staff?<br>25. Adequate adjustment for confounding?<br>26. Losses to follow-up taken into account?<br>27. Study sufficiently powered? | Reporting (/11)<br>External validity (/3)<br>Internal validity - bias (/7)<br>Internal validity - confounding (/6)<br>Power (/5)<br>Total Downs and Black summary score (/32) |
| Krieger (2000) | cct           | 1 1 1 1 2 1 1 0 1 1                                                                                                                                                                                                                                                                                                                                                                                                                                                            | 1 0 1                                                                                                                                                                                                                    | 0 1 1 1 1 1 1                                                                                                                                                                                                                                                                                                                                                                                   | 1 1 1 0 1 1                                                                                                                                                                                                                                                                                                                                                                              | 10 2 6 5 0                                                                                                                                                                    |
| Shenson (2001) | pcs (cluster) | 1 1 1 1 0 1 0 0 1 0                                                                                                                                                                                                                                                                                                                                                                                                                                                            | 1 1 1                                                                                                                                                                                                                    | 0 0 1 1 1 1 1                                                                                                                                                                                                                                                                                                                                                                                   | 0 1 0 0 9 1                                                                                                                                                                                                                                                                                                                                                                              | 6 3 5 2 0                                                                                                                                                                     |

| Study ID       | Design        | Adequate sequence generation | Allocation concealment | Blinding (or accurate outcome assessment) | Incomplete outcome data addressed | Free of other bias (i.e.: contamination effects) | Free of ROB issues |
|----------------|---------------|------------------------------|------------------------|-------------------------------------------|-----------------------------------|--------------------------------------------------|--------------------|
| Krieger (2000) | cct           | 1                            | 0                      | 1                                         | 1                                 | 0                                                | 0                  |
| Shenson (2001) | pcs (cluster) | NRS                          | NRS                    | 1                                         | 1                                 | 1                                                | NRS                |

Exhibit B.2.6. Pneumococcal vaccinations – Continuous quality improvement (CQI) or similar

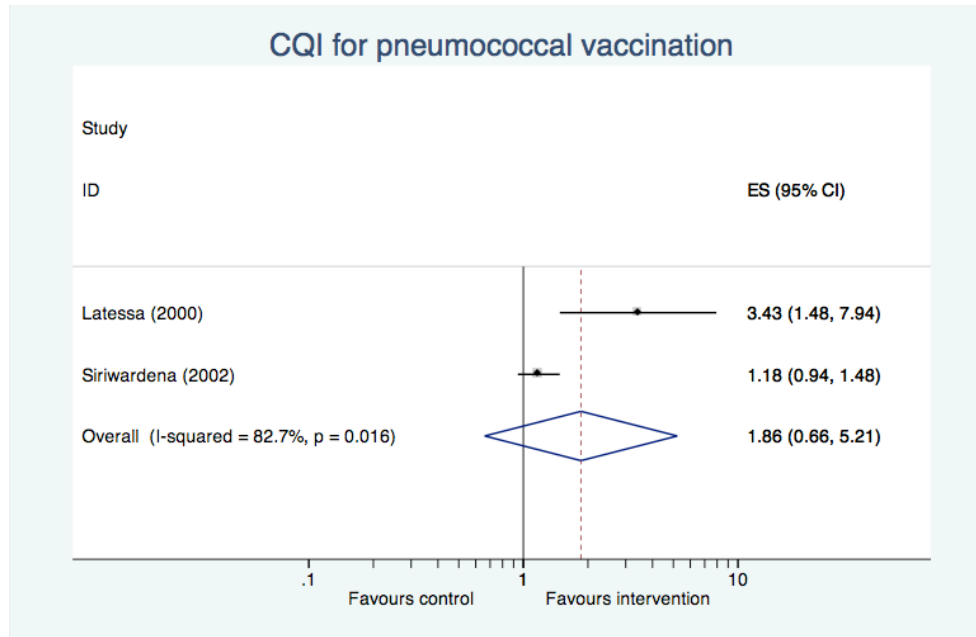

| Study ID           | Design        | Reporting                                                                                                                                                                                                                                                                                                                                                                                                                                                                                                                                                                                                                                                                                                                                                                                                                                                                                                                                                                                                                                                                                                                                                                                                                                                                                                                                                                                                                                                                                                 | validity                                                                                                                         | Internal validity - bias                  | confounding | Summary scores |
|--------------------|---------------|-----------------------------------------------------------------------------------------------------------------------------------------------------------------------------------------------------------------------------------------------------------------------------------------------------------------------------------------------------------------------------------------------------------------------------------------------------------------------------------------------------------------------------------------------------------------------------------------------------------------------------------------------------------------------------------------------------------------------------------------------------------------------------------------------------------------------------------------------------------------------------------------------------------------------------------------------------------------------------------------------------------------------------------------------------------------------------------------------------------------------------------------------------------------------------------------------------------------------------------------------------------------------------------------------------------------------------------------------------------------------------------------------------------------------------------------------------------------------------------------------------------|----------------------------------------------------------------------------------------------------------------------------------|-------------------------------------------|-------------|----------------|
| Latessa (2000)     | cba (cluster) | 1 1 1 1 2 1 1 0 1 1                                                                                                                                                                                                                                                                                                                                                                                                                                                                                                                                                                                                                                                                                                                                                                                                                                                                                                                                                                                                                                                                                                                                                                                                                                                                                                                                                                                                                                                                                       | 1 1 1                                                                                                                            | 0 0 1 1 1 1 0                             | 1 1 0 0 0 1 | 10 3 4 3 0     |
| Siriwardena (2002) | rct (cluster) | 1 1 1 1 2 1 1 0 1 1                                                                                                                                                                                                                                                                                                                                                                                                                                                                                                                                                                                                                                                                                                                                                                                                                                                                                                                                                                                                                                                                                                                                                                                                                                                                                                                                                                                                                                                                                       | 1 1 1                                                                                                                            | 1 0 1 1 1 1 0                             | 1 1 1 1 1 1 | 10 3 5 6 2     |
|                    |               | 1. Study aim clearly defined?<br>2. Main outcomes described in methods?<br>3. Patient characteristics described?<br>4. Interventions clearly described?<br>5. Distributions of principal confounders described?<br>6. Main findings described?<br>7. Estimates of random variability provided for main outcomes?<br>8. All important potential adverse events reported?<br>9. Characteristics of patients lost to follow-up described?<br>10. Actual p-values values reported?<br>11. Subjects asked to participate represented of entire population?<br>12. Subjects prepared to participate representative of entire population?<br>13. Staff, places, and facilities representative of usual treatment?<br>14. Attempt made to blind study subjects to interventions?<br>15. Attempt made to blind those measuring main outcomes?<br>16. If results were based on "data dredging", was this clear?<br>17. Analyses adjusted for different lengths of follow-up?<br>18. Statistical tests appropriate?<br>19. Compliance with intervention(s) reliable?<br>20. Main outcomes accurate (valid and reliable)?<br>21. Patients in different groups recruited from same population?<br>22. Patients in different groups recruited over the same time period?<br>23. Study subjects randomized?<br>24. Randomization assignment concealed from patients and health care staff?<br>25. Adequate adjustment for confounding?<br>26. Losses to follow-up taken into account?<br>27. Study sufficiently powered? | Reporting (/11)<br>External validity (/3)<br>Internal validity - bias (/7)<br>Internal validity - confounding (/6)<br>Power (/5) | Total Downs and Black summary score (/32) |             |                |

| Study ID           | Design        | Adequate sequence generation | Allocation concealment | Blinding (or accurate outcome assessment) | Incomplete outcome data addressed | Free of other bias (i.e.: contamination effects) | Free of ROB issues |
|--------------------|---------------|------------------------------|------------------------|-------------------------------------------|-----------------------------------|--------------------------------------------------|--------------------|
| Latessa (2000)     | cba (cluster) | NRS                          | NRS                    | 0                                         | 1                                 | 1                                                | NRS                |
| Siriwardena (2002) | rct (cluster) | 1                            | 1                      | 0                                         | 1                                 | 1                                                | 0                  |

Exhibit B.2.7. Pneumococcal vaccinations – Delivery site change

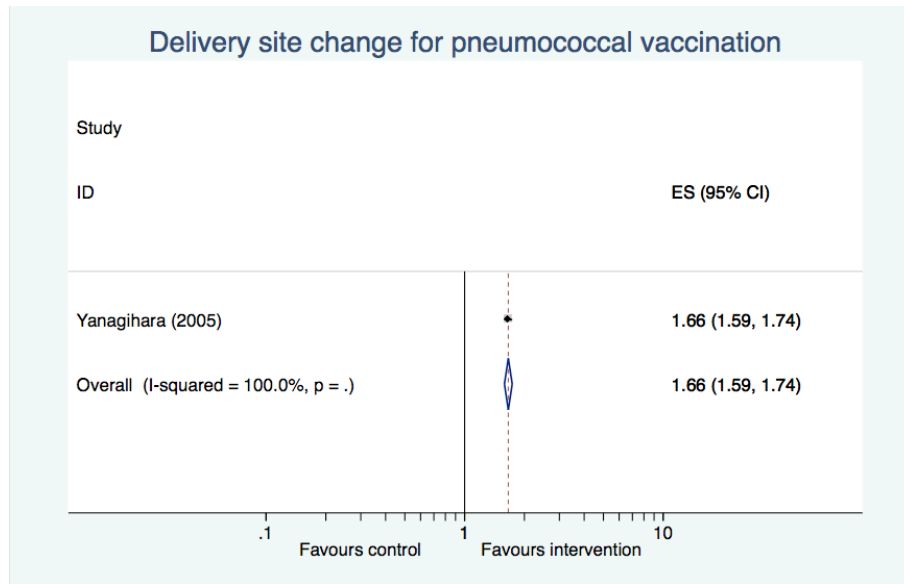

| Study ID          | Design | Reporting           | validity | Internal validity - bias | confounding | Summary scores |
|-------------------|--------|---------------------|----------|--------------------------|-------------|----------------|
| Yanagihara (2005) | pcs    | 1 1 1 1 0 1 1 0 1 1 | 1 1 1    | 0 1 1 1 1 1 1            | 0 1 0 0 9 1 | 0 8 3 6 2 0 19 |

| Study ID          | Design | Adequate sequence generation | Allocation concealment | Blinding (or accurate outcome assessment) | Incomplete outcome data addressed | Free of other bias (i.e.: contamination effects) | Free of ROB issues |
|-------------------|--------|------------------------------|------------------------|-------------------------------------------|-----------------------------------|--------------------------------------------------|--------------------|
| Yanagihara (2005) | pcs    | NRS                          | NRS                    | 1                                         | 1                                 | 0                                                | NRS                |

Exhibit B.2.8. Pneumococcal vaccinations – Financial incentives (clinicians)

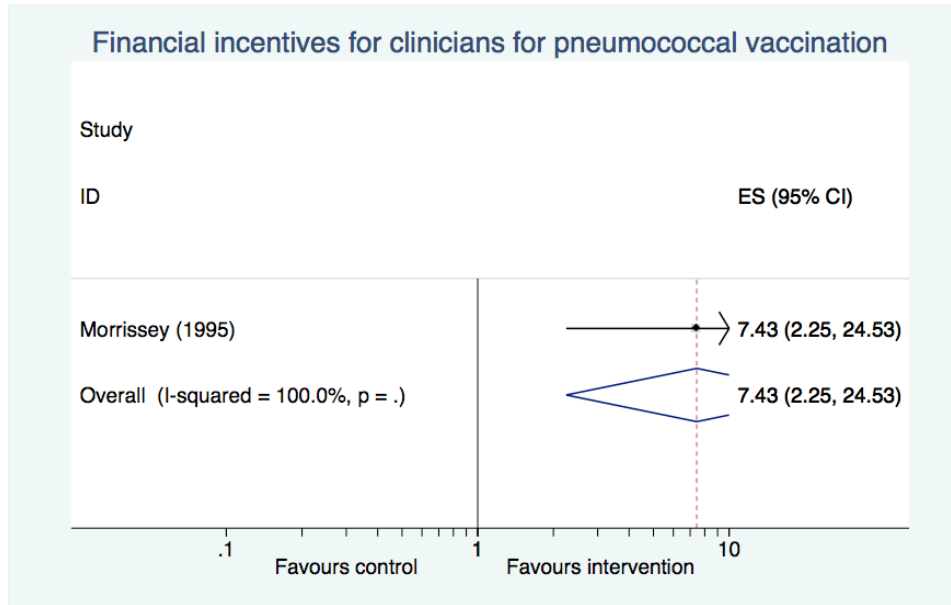

| Study ID         | Design | Reporting                                                                                                                                                                                                                                                                                                                                                                                                                                                                      | validity                                                                                                                                                                                                                    | Internal validity - bias                                                                                                                                                                                                                                                                                                                                                                        | confounding                                                                                                                                                                                                                                                                                                                                                                              | Summary scores                                                                                                                   |
|------------------|--------|--------------------------------------------------------------------------------------------------------------------------------------------------------------------------------------------------------------------------------------------------------------------------------------------------------------------------------------------------------------------------------------------------------------------------------------------------------------------------------|-----------------------------------------------------------------------------------------------------------------------------------------------------------------------------------------------------------------------------|-------------------------------------------------------------------------------------------------------------------------------------------------------------------------------------------------------------------------------------------------------------------------------------------------------------------------------------------------------------------------------------------------|------------------------------------------------------------------------------------------------------------------------------------------------------------------------------------------------------------------------------------------------------------------------------------------------------------------------------------------------------------------------------------------|----------------------------------------------------------------------------------------------------------------------------------|
| Morrissey (1995) | rct    | 1. Study aim clearly defined?<br>2. Main outcomes described in methods?<br>3. Patient characteristics described?<br>4. Interventions clearly described?<br>5. Distributions of principal confounders described?<br>6. Main findings described?<br>7. Estimates of random variability provided for main outcomes?<br>8. All important potential adverse events reported?<br>9. Characteristics of patients lost to follow-up described?<br>10. Actual p-values values reported? | 11. Subjects asked to participate representative of entire population?<br>12. Subjects prepared to participate representative of entire population?<br>13. Staff, places, and facilities representative of usual treatment? | 14. Attempt made to blind study subjects to interventions?<br>15. Attempt made to blind those measuring main outcomes?<br>16. If results were based on "data dredging", was this clear?<br>17. Analyses adjusted for different lengths of follow-up?<br>18. Statistical tests appropriate?<br>19. Compliance with intervention(s) reliable?<br>20. Main outcomes accurate (valid and reliable)? | 21. Patients in different groups recruited from same population?<br>22. Patients in different groups recruited over the same time period?<br>23. Study subjects randomized?<br>24. Randomization assignment concealed from patients and health care staff?<br>25. Adequate adjustment for confounding?<br>26. Losses to follow-up taken into account?<br>27. Study sufficiently powered? | Reporting (/11)<br>External validity (/3)<br>Internal validity - bias (/7)<br>Internal validity - confounding (/6)<br>Power (/5) |
|                  |        | Total Downs and Black summary score (/32)                                                                                                                                                                                                                                                                                                                                                                                                                                      |                                                                                                                                                                                                                             |                                                                                                                                                                                                                                                                                                                                                                                                 |                                                                                                                                                                                                                                                                                                                                                                                          |                                                                                                                                  |

| Study ID         | Design | Adequate sequence generation | Allocation concealment | Blinding (or accurate outcome assessment) | Incomplete outcome data addressed | Free of other bias (i.e.: contamination effects) | Free of ROB issues |
|------------------|--------|------------------------------|------------------------|-------------------------------------------|-----------------------------------|--------------------------------------------------|--------------------|
| Morrissey (1995) | rct    | 1                            | 1                      | 1                                         | 1                                 | 0                                                | 0                  |



Exhibit B.2.9. Pneumococcal vaccinations – Patient outreach

# Patient outreach for pneumococcal vaccination

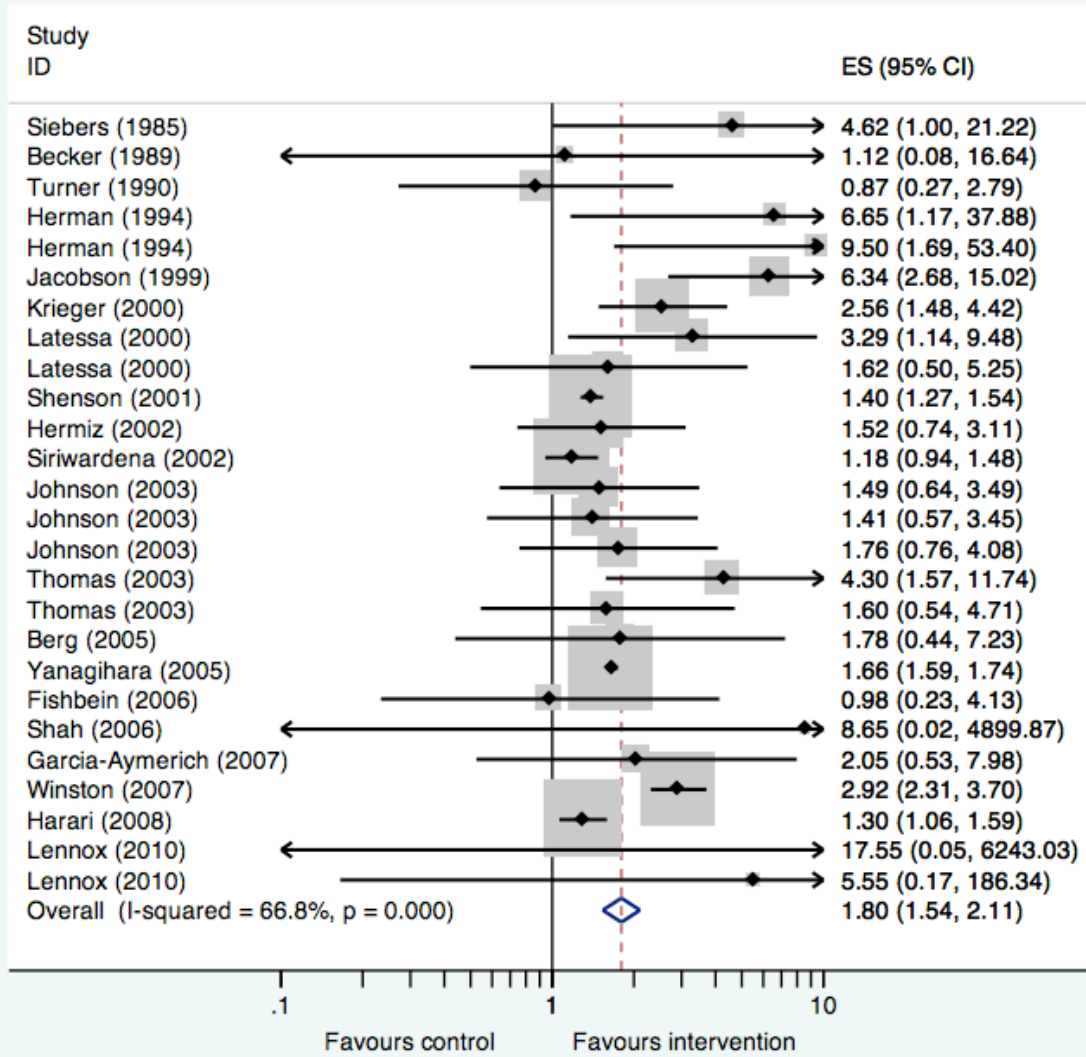

Exhibit B.2.9. Pneumococcal vaccinations – Patient outreach (Continued)

| Study ID               | Design        | Reporting                     |                                        |                                       |                                     |                                                      |                             |                                                                |                                                     |                                                             |                                      | validity                                                            | Internal validity - bias                                                  |                                                                      |                                                            |                                                          |                                                               | confounding                                               |                                    |                                               |                                                  |                                                                  | Summary scores                                                        |                                |                                                                             |                                          |                                             |                                 |                 |                        |                               |                                      |            |                                           |
|------------------------|---------------|-------------------------------|----------------------------------------|---------------------------------------|-------------------------------------|------------------------------------------------------|-----------------------------|----------------------------------------------------------------|-----------------------------------------------------|-------------------------------------------------------------|--------------------------------------|---------------------------------------------------------------------|---------------------------------------------------------------------------|----------------------------------------------------------------------|------------------------------------------------------------|----------------------------------------------------------|---------------------------------------------------------------|-----------------------------------------------------------|------------------------------------|-----------------------------------------------|--------------------------------------------------|------------------------------------------------------------------|-----------------------------------------------------------------------|--------------------------------|-----------------------------------------------------------------------------|------------------------------------------|---------------------------------------------|---------------------------------|-----------------|------------------------|-------------------------------|--------------------------------------|------------|-------------------------------------------|
|                        |               | 1. Study aim clearly defined? | 2. Main outcomes described in methods? | 3. Patient characteristics described? | 4. Interventions clearly described? | 5. Distributions of principal confounders described? | 6. Main findings described? | 7. Estimates of random variability provided for main outcomes? | 8. All important potential adverse events reported? | 9. Characteristics of patients lost to follow-up described? | 10. Actual p-values values reported? | 11. Subjects asked to participate represented of entire population? | 12. Subjects prepared to participate representative of entire population? | 13. Staff, places, and facilities representative of usual treatment? | 14. Attempt made to blind study subjects to interventions? | 15. Attempt made to blind those measuring main outcomes? | 16. If results were based on "data dredging", was this clear? | 17. Analyses adjusted for different lengths of follow-up? | 18. Statistical tests appropriate? | 19. Compliance with intervention(s) reliable? | 20. Main outcomes accurate (valid and reliable)? | 21. Patients in different groups recruited from same population? | 22. Patients in different groups recruited over the same time period? | 23. Study subjects randomized? | 24. Randomization assignment concealed from patients and health care staff? | 25. Adequate adjustment for confounding? | 26. Losses to follow-up taken into account? | 27. Study sufficiently powered? | Reporting (/11) | External validity (/3) | Internal validity - bias (/7) | Internal validity - confounding (/6) | Power (/5) | Total Downs and Black summary score (/32) |
| Becker (1989)          | cct           | 1                             | 1                                      | 1                                     | 1                                   | 1                                                    | 1                           | 1                                                              | 0                                                   | 1                                                           | 1                                    | 1                                                                   | 0                                                                         | 1                                                                    | 0                                                          | 0                                                        | 1                                                             | 1                                                         | 1                                  | 1                                             | 0                                                | 1                                                                | 1                                                                     | 1                              | 0                                                                           | 1                                        | 0                                           | 0                               | 9               | 2                      | 4                             | 4                                    | 0          | 19                                        |
| Berg (2005)            | rct           | 1                             | 1                                      | 1                                     | 1                                   | 2                                                    | 1                           | 1                                                              | 0                                                   | 1                                                           | 1                                    | 1                                                                   | 1                                                                         | 1                                                                    | 0                                                          | 1                                                        | 1                                                             | 1                                                         | 1                                  | 1                                             | 1                                                | 1                                                                | 1                                                                     | 0                              | 0                                                                           | 1                                        | 1                                           | 0                               | 10              | 3                      | 5                             | 4                                    | 0          | 22                                        |
| Fishbein (2006)        | cba           | 1                             | 1                                      | 1                                     | 1                                   | 1                                                    | 1                           | 1                                                              | 0                                                   | 1                                                           | 0                                    | 1                                                                   | 1                                                                         | 1                                                                    | 0                                                          | 0                                                        | 1                                                             | 1                                                         | 1                                  | 1                                             | 0                                                | 1                                                                | 1                                                                     | 0                              | 0                                                                           | 9                                        | 1                                           | 0                               | 8               | 3                      | 4                             | 3                                    | 0          | 18                                        |
| Garcia-Aymerich (2007) | rct           | 1                             | 1                                      | 1                                     | 1                                   | 2                                                    | 1                           | 1                                                              | 0                                                   | 1                                                           | 1                                    | 1                                                                   | 1                                                                         | 1                                                                    | 0                                                          | 1                                                        | 1                                                             | 1                                                         | 1                                  | 1                                             | 0                                                | 1                                                                | 1                                                                     | 1                              | 1                                                                           | 1                                        | 0                                           | 0                               | 10              | 3                      | 5                             | 5                                    | 0          | 23                                        |
| Harari (2008)          | rct           | 1                             | 1                                      | 1                                     | 1                                   | 2                                                    | 1                           | 1                                                              | 0                                                   | 0                                                           | 1                                    | 1                                                                   | 1                                                                         | 1                                                                    | 0                                                          | 0                                                        | 1                                                             | 1                                                         | 1                                  | 1                                             | 0                                                | 1                                                                | 1                                                                     | 1                              | 1                                                                           | 1                                        | 0                                           | 0                               | 9               | 3                      | 4                             | 4                                    | 0          | 20                                        |
| Herman (1994)          | rct (cluster) | 1                             | 1                                      | 1                                     | 1                                   | 2                                                    | 1                           | 1                                                              | 0                                                   | 1                                                           | 1                                    | 1                                                                   | 1                                                                         | 1                                                                    | 0                                                          | 0                                                        | 1                                                             | 1                                                         | 1                                  | 1                                             | 1                                                | 1                                                                | 1                                                                     | 1                              | 1                                                                           | 1                                        | 1                                           | 0                               | 10              | 3                      | 5                             | 6                                    | 0          | 24                                        |
| Hermiz (2002)          | cct           | 1                             | 1                                      | 1                                     | 1                                   | 1                                                    | 1                           | 1                                                              | 0                                                   | 1                                                           | 1                                    | 1                                                                   | 0                                                                         | 1                                                                    | 0                                                          | 0                                                        | 1                                                             | 1                                                         | 1                                  | 1                                             | 0                                                | 1                                                                | 1                                                                     | 1                              | 0                                                                           | 1                                        | 1                                           | 0                               | 9               | 2                      | 4                             | 5                                    | 0          | 20                                        |
| Jacobson (1999)        | cct           | 1                             | 1                                      | 1                                     | 1                                   | 2                                                    | 1                           | 1                                                              | 0                                                   | 0                                                           | 1                                    | 1                                                                   | 1                                                                         | 1                                                                    | 0                                                          | 0                                                        | 1                                                             | 1                                                         | 1                                  | 1                                             | 0                                                | 1                                                                | 1                                                                     | 1                              | 0                                                                           | 0                                        | 0                                           | 5                               | 9               | 3                      | 4                             | 3                                    | 1          | 20                                        |
| Johnson (2003)         | cba           | 1                             | 1                                      | 1                                     | 0                                   | 1                                                    | 1                           | 1                                                              | 0                                                   | 1                                                           | 1                                    | 1                                                                   | 1                                                                         | 1                                                                    | 0                                                          | 1                                                        | 1                                                             | 1                                                         | 1                                  | 1                                             | 1                                                | 0                                                                | 1                                                                     | 0                              | 0                                                                           | 1                                        | 1                                           | 0                               | 8               | 3                      | 6                             | 3                                    | 0          | 20                                        |
| Krieger (2000)         | cct           | 1                             | 1                                      | 1                                     | 1                                   | 2                                                    | 1                           | 1                                                              | 0                                                   | 1                                                           | 1                                    | 1                                                                   | 0                                                                         | 1                                                                    | 0                                                          | 1                                                        | 1                                                             | 1                                                         | 1                                  | 1                                             | 1                                                | 1                                                                | 1                                                                     | 1                              | 0                                                                           | 1                                        | 1                                           | 0                               | 10              | 2                      | 6                             | 5                                    | 0          | 23                                        |
| Latessa (2000)         | cba (cluster) | 1                             | 1                                      | 1                                     | 1                                   | 2                                                    | 1                           | 1                                                              | 0                                                   | 1                                                           | 1                                    | 1                                                                   | 1                                                                         | 1                                                                    | 0                                                          | 0                                                        | 1                                                             | 1                                                         | 1                                  | 1                                             | 0                                                | 1                                                                | 1                                                                     | 0                              | 0                                                                           | 1                                        | 0                                           | 0                               | 10              | 3                      | 4                             | 3                                    | 0          | 20                                        |
| Lennox (2010)          | rct (cluster) | 1                             | 0                                      | 1                                     | 1                                   | 2                                                    | 1                           | 1                                                              | 1                                                   | 1                                                           | 1                                    | 1                                                                   | 0                                                                         | 1                                                                    | 0                                                          | 1                                                        | 1                                                             | 1                                                         | 1                                  | 1                                             | 1                                                | 1                                                                | 1                                                                     | 1                              | 1                                                                           | 1                                        | 1                                           | 0                               | 10              | 2                      | 6                             | 6                                    | 0          | 24                                        |
| Shah (2006)            | pcs (cluster) | 1                             | 1                                      | 1                                     | 1                                   | 2                                                    | 1                           | 1                                                              | 0                                                   | 0                                                           | 1                                    | 1                                                                   | 1                                                                         | 1                                                                    | 0                                                          | 0                                                        | 1                                                             | 1                                                         | 1                                  | 1                                             | 0                                                | 0                                                                | 1                                                                     | 0                              | 0                                                                           | 1                                        | 0                                           | 0                               | 10              | 3                      | 4                             | 4                                    | 0          | 21                                        |
| Shenson (2001)         | pcs (cluster) | 1                             | 1                                      | 1                                     | 1                                   | 0                                                    | 1                           | 0                                                              | 0                                                   | 1                                                           | 0                                    | 1                                                                   | 1                                                                         | 1                                                                    | 0                                                          | 0                                                        | 1                                                             | 1                                                         | 1                                  | 1                                             | 1                                                | 0                                                                | 1                                                                     | 0                              | 0                                                                           | 9                                        | 1                                           | 0                               | 6               | 3                      | 5                             | 2                                    | 0          | 16                                        |
| Siebers (1985)         | cct           | 1                             | 1                                      | 1                                     | 1                                   | 1                                                    | 1                           | 1                                                              | 0                                                   | 1                                                           | 0                                    | 1                                                                   | 1                                                                         | 1                                                                    | 0                                                          | 0                                                        | 1                                                             | 1                                                         | 1                                  | 1                                             | 0                                                | 1                                                                | 1                                                                     | 1                              | 0                                                                           | 1                                        | 1                                           | 0                               | 7               | 3                      | 4                             | 5                                    | 0          | 19                                        |
| Siriwardena (2002)     | rct (cluster) | 1                             | 1                                      | 1                                     | 1                                   | 2                                                    | 1                           | 1                                                              | 0                                                   | 1                                                           | 1                                    | 1                                                                   | 1                                                                         | 1                                                                    | 1                                                          | 0                                                        | 1                                                             | 1                                                         | 1                                  | 1                                             | 0                                                | 1                                                                | 1                                                                     | 1                              | 1                                                                           | 1                                        | 1                                           | 2                               | 10              | 3                      | 5                             | 6                                    | 2          | 26                                        |
| Thomas (2003)          | cct           | 1                             | 1                                      | 1                                     | 1                                   | 2                                                    | 1                           | 1                                                              | 0                                                   | 1                                                           | 1                                    | 1                                                                   | 1                                                                         | 1                                                                    | 0                                                          | 0                                                        | 1                                                             | 1                                                         | 1                                  | 1                                             | 0                                                | 1                                                                | 1                                                                     | 1                              | 0                                                                           | 1                                        | 1                                           | 1                               | 10              | 3                      | 4                             | 5                                    | 1          | 23                                        |
| Turner (1990)          | rct (cluster) | 1                             | 1                                      | 1                                     | 1                                   | 1                                                    | 1                           | 1                                                              | 0                                                   | 1                                                           | 1                                    | 1                                                                   | 1                                                                         | 1                                                                    | 0                                                          | 0                                                        | 1                                                             | 1                                                         | 0                                  | 1                                             | 0                                                | 1                                                                | 1                                                                     | 1                              | 1                                                                           | 1                                        | 1                                           | 0                               | 9               | 3                      | 3                             | 6                                    | 0          | 21                                        |
| Winston (2007)         | rct           | 1                             | 1                                      | 1                                     | 1                                   | 2                                                    | 1                           | 1                                                              | 0                                                   | 1                                                           | 1                                    | 1                                                                   | 1                                                                         | 1                                                                    | 0                                                          | 1                                                        | 1                                                             | 1                                                         | 1                                  | 1                                             | 1                                                | 1                                                                | 1                                                                     | 1                              | 1                                                                           | 1                                        | 1                                           | 0                               | 10              | 3                      | 6                             | 6                                    | 0          | 25                                        |
| Yanagihara (2005)      | pcs           | 1                             | 1                                      | 1                                     | 1                                   | 0                                                    | 1                           | 1                                                              | 0                                                   | 1                                                           | 1                                    | 1                                                                   | 1                                                                         | 1                                                                    | 0                                                          | 1                                                        | 1                                                             | 1                                                         | 1                                  | 1                                             | 1                                                | 0                                                                | 1                                                                     | 0                              | 0                                                                           | 9                                        | 1                                           | 0                               | 8               | 3                      | 6                             | 2                                    | 0          | 19                                        |

Exhibit B.2.9. Pneumococcal vaccinations – Patient outreach (Continued)

| Study ID               | Design        | Adequate sequence generation | Allocation concealment | Blinding (or accurate outcome assessment) | Incomplete outcome data addressed | Free of other bias (i.e.: contamination effects) | Free of ROB issues |
|------------------------|---------------|------------------------------|------------------------|-------------------------------------------|-----------------------------------|--------------------------------------------------|--------------------|
| Becker (1989)          | cct           | 1                            | 0                      | 0                                         | 0                                 | 0                                                | 0                  |
| Berg (2005)            | rct           | NRS                          | NRS                    | 1                                         | 1                                 | 0                                                | NRS                |
| Fishbein (2006)        | cba           | NRS                          | NRS                    | 0                                         | 1                                 | 0                                                | NRS                |
| Garcia-Aymerich (2007) | rct           | 1                            | 1                      | 1                                         | 0                                 | 0                                                | 0                  |
| Harari (2008)          | rct           | 1                            | 1                      | 0                                         | 0                                 | 0                                                | 0                  |
| Herman (1994)          | rct (cluster) | 1                            | 1                      | 1                                         | 1                                 | 1                                                | 1                  |
| Hermiz (2002)          | cct           | 1                            | 0                      | 0                                         | 1                                 | 0                                                | 0                  |
| Jacobson (1999)        | cct           | 1                            | 0                      | 0                                         | 0                                 | 0                                                | 0                  |
| Johnson (2003)         | cba           | NRS                          | NRS                    | 1                                         | 1                                 | 0                                                | NRS                |
| Krieger (2000)         | cct           | 1                            | 0                      | 1                                         | 1                                 | 0                                                | 0                  |
| Latessa (2000)         | cba (cluster) | NRS                          | NRS                    | 0                                         | 1                                 | 1                                                | NRS                |
| Lennox (2010)          | rct (cluster) | 1                            | 1                      | 1                                         | 1                                 | 1                                                | 1                  |
| Shah (2006)            | pcs (cluster) | NRS                          | NRS                    | 0                                         | 0                                 | 1                                                | NRS                |
| Shenson (2001)         | pcs (cluster) | NRS                          | NRS                    | 1                                         | 1                                 | 1                                                | NRS                |
| Siebers (1985)         | cct           | 1                            | 0                      | 0                                         | 1                                 | 0                                                | 0                  |
| Siriwardena (2002)     | rct (cluster) | 1                            | 1                      | 0                                         | 1                                 | 1                                                | 0                  |
| Thomas (2003)          | cct           | 1                            | 0                      | 0                                         | 1                                 | 0                                                | 0                  |
| Turner (1990)          | rct (cluster) | 1                            | 1                      | 0                                         | 1                                 | 1                                                | 0                  |
| Winston (2007)         | rct           | 1                            | 1                      | 1                                         | 1                                 | 0                                                | 0                  |
| Yanagihara (2005)      | pcs           | NRS                          | NRS                    | 1                                         | 1                                 | 0                                                | NRS                |

Exhibit B.2.10. Pneumococcal vaccinations – Team change

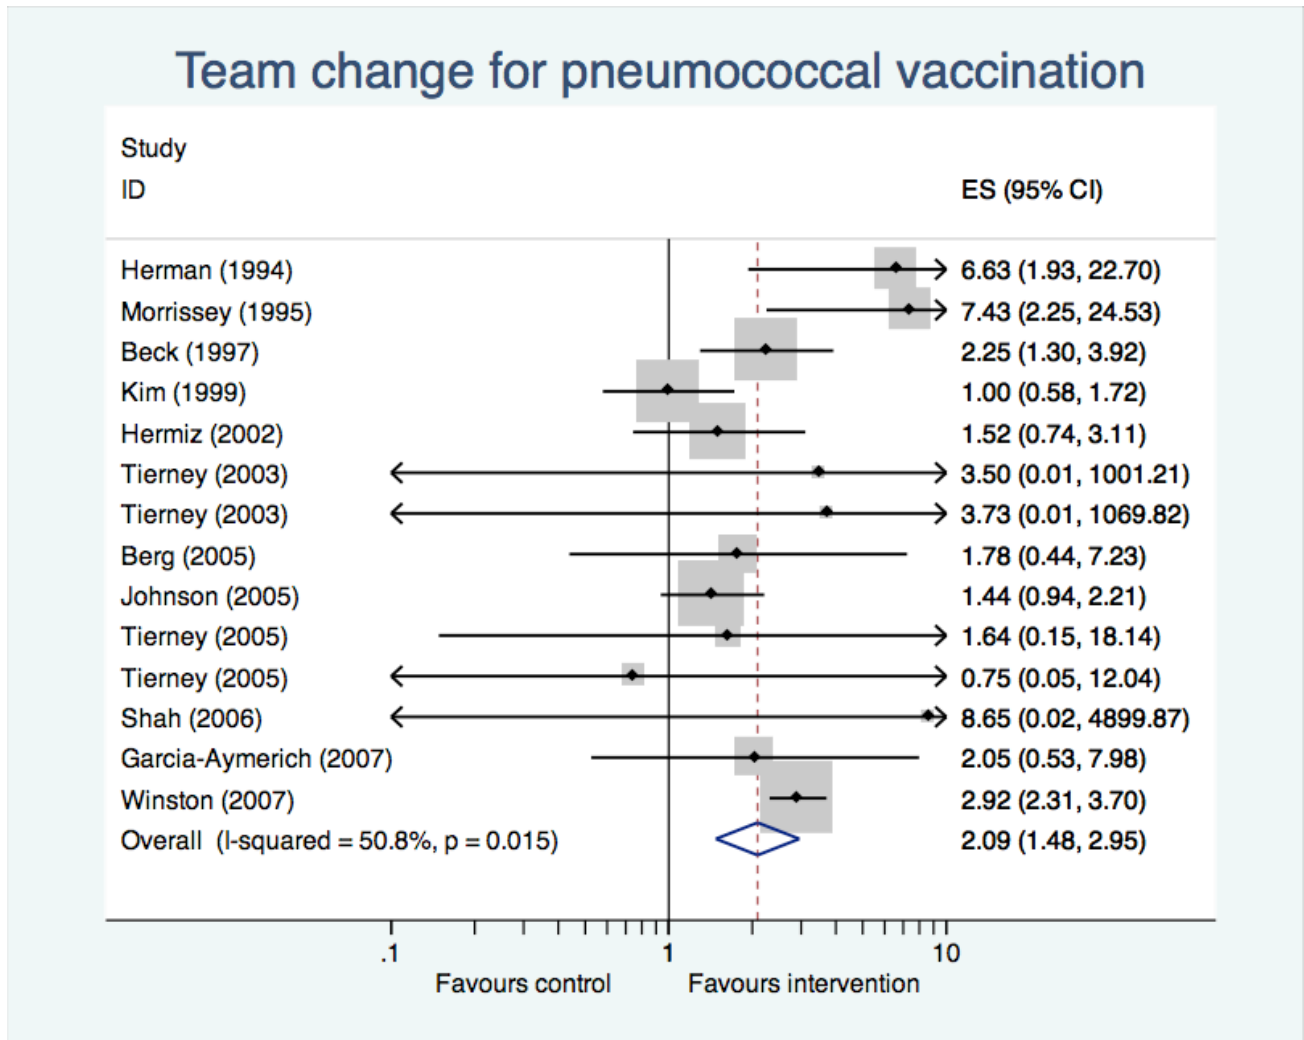

Exhibit B.2.10. Pneumococcal vaccinations – Team change (Continued)

| Study ID               | Design        | Reporting                                                                                                                                                                                                                                                                                                                                                                                                                                                                                                                                                                                                                                                                                                                                                                                                                                                                                                                                                                                                                                                                                                                                                                                                                                                                                                                                                                                                                                                                                                 | validity | Internal validity - bias | confounding | Summary scores                                                                                                                                                                |
|------------------------|---------------|-----------------------------------------------------------------------------------------------------------------------------------------------------------------------------------------------------------------------------------------------------------------------------------------------------------------------------------------------------------------------------------------------------------------------------------------------------------------------------------------------------------------------------------------------------------------------------------------------------------------------------------------------------------------------------------------------------------------------------------------------------------------------------------------------------------------------------------------------------------------------------------------------------------------------------------------------------------------------------------------------------------------------------------------------------------------------------------------------------------------------------------------------------------------------------------------------------------------------------------------------------------------------------------------------------------------------------------------------------------------------------------------------------------------------------------------------------------------------------------------------------------|----------|--------------------------|-------------|-------------------------------------------------------------------------------------------------------------------------------------------------------------------------------|
|                        |               | 1. Study aim clearly defined?<br>2. Main outcomes described in methods?<br>3. Patient characteristics described?<br>4. Interventions clearly described?<br>5. Distributions of principal confounders described?<br>6. Main findings described?<br>7. Estimates of random variability provided for main outcomes?<br>8. All important potential adverse events reported?<br>9. Characteristics of patients lost to follow-up described?<br>10. Actual p-values values reported?<br>11. Subjects asked to participate represented of entire population?<br>12. Subjects prepared to participate representative of entire population?<br>13. Staff, places, and facilities representative of usual treatment?<br>14. Attempt made to blind study subjects to interventions?<br>15. Attempt made to blind those measuring main outcomes?<br>16. If results were based on "data dredging", was this clear?<br>17. Analyses adjusted for different lengths of follow-up?<br>18. Statistical tests appropriate?<br>19. Compliance with intervention(s) reliable?<br>20. Main outcomes accurate (valid and reliable)?<br>21. Patients in different groups recruited from same population?<br>22. Patients in different groups recruited over the same time period?<br>23. Study subjects randomized?<br>24. Randomization assignment concealed from patients and health care staff?<br>25. Adequate adjustment for confounding?<br>26. Losses to follow-up taken into account?<br>27. Study sufficiently powered? |          |                          |             | Reporting (/11)<br>External validity (/3)<br>Internal validity - bias (/7)<br>Internal validity - confounding (/6)<br>Power (/5)<br>Total Downs and Black summary score (/32) |
| Beck (1997)            | cct           | 1 1 1 1 2 1 1 0 0 1                                                                                                                                                                                                                                                                                                                                                                                                                                                                                                                                                                                                                                                                                                                                                                                                                                                                                                                                                                                                                                                                                                                                                                                                                                                                                                                                                                                                                                                                                       | 1 0 1    | 0 1 1 1 1 1 1            | 1 1 1 0 1 0 | 0 9 2 6 4 0 21                                                                                                                                                                |
| Berg (2005)            | rct           | 1 1 1 1 2 1 1 0 1 1                                                                                                                                                                                                                                                                                                                                                                                                                                                                                                                                                                                                                                                                                                                                                                                                                                                                                                                                                                                                                                                                                                                                                                                                                                                                                                                                                                                                                                                                                       | 1 1 1    | 0 1 1 1 1 1 1            | 1 1 0 0 1 1 | 0 10 3 5 4 0 22                                                                                                                                                               |
| Garcia-Aymerich (2007) | rct           | 1 1 1 1 2 1 1 0 1 1                                                                                                                                                                                                                                                                                                                                                                                                                                                                                                                                                                                                                                                                                                                                                                                                                                                                                                                                                                                                                                                                                                                                                                                                                                                                                                                                                                                                                                                                                       | 1 1 1    | 0 1 1 1 1 1 0            | 1 1 1 1 1 0 | 0 10 3 5 5 0 23                                                                                                                                                               |
| Herman (1994)          | rct (cluster) | 1 1 1 1 2 1 1 0 1 1                                                                                                                                                                                                                                                                                                                                                                                                                                                                                                                                                                                                                                                                                                                                                                                                                                                                                                                                                                                                                                                                                                                                                                                                                                                                                                                                                                                                                                                                                       | 1 1 1    | 0 0 1 1 1 1 1            | 1 1 1 1 1 1 | 0 10 3 5 6 0 24                                                                                                                                                               |
| Hermiz (2002)          | cct           | 1 1 1 1 1 1 1 0 1 1                                                                                                                                                                                                                                                                                                                                                                                                                                                                                                                                                                                                                                                                                                                                                                                                                                                                                                                                                                                                                                                                                                                                                                                                                                                                                                                                                                                                                                                                                       | 1 0 1    | 0 0 1 1 1 1 0            | 1 1 1 0 1 1 | 0 9 2 4 5 0 20                                                                                                                                                                |
| Johnson (2005)         | rct           | 1 1 1 1 2 1 1 0 1 1                                                                                                                                                                                                                                                                                                                                                                                                                                                                                                                                                                                                                                                                                                                                                                                                                                                                                                                                                                                                                                                                                                                                                                                                                                                                                                                                                                                                                                                                                       | 0 0 1    | 0 1 1 1 1 1 1            | 1 1 0 0 1 1 | 0 10 1 6 4 0 21                                                                                                                                                               |
| Kim (1999)             | rct (cluster) | 1 1 1 1 2 1 1 0 1 1                                                                                                                                                                                                                                                                                                                                                                                                                                                                                                                                                                                                                                                                                                                                                                                                                                                                                                                                                                                                                                                                                                                                                                                                                                                                                                                                                                                                                                                                                       | 1 0 1    | 1 0 1 1 1 1 0            | 1 1 1 1 1 1 | 0 10 2 5 6 0 23                                                                                                                                                               |
| Morrissey (1995)       | rct           | 1 1 1 1 2 1 1 0 1 1                                                                                                                                                                                                                                                                                                                                                                                                                                                                                                                                                                                                                                                                                                                                                                                                                                                                                                                                                                                                                                                                                                                                                                                                                                                                                                                                                                                                                                                                                       | 1 0 1    | 0 1 1 1 1 1 0            | 1 1 1 1 1 1 | 0 10 2 5 6 0 23                                                                                                                                                               |
| Shah (2006)            | pcs (cluster) | 1 1 1 1 2 1 1 0 0 1                                                                                                                                                                                                                                                                                                                                                                                                                                                                                                                                                                                                                                                                                                                                                                                                                                                                                                                                                                                                                                                                                                                                                                                                                                                                                                                                                                                                                                                                                       | 1 1 1    | 0 0 1 1 1 1 0            | 0 1 0 0 1 0 | 0 10 3 4 4 0 21                                                                                                                                                               |
| Tierney (2003)         | rct (cluster) | 1 1 1 1 1 1 1 0 1 1                                                                                                                                                                                                                                                                                                                                                                                                                                                                                                                                                                                                                                                                                                                                                                                                                                                                                                                                                                                                                                                                                                                                                                                                                                                                                                                                                                                                                                                                                       | 1 0 1    | 1 1 1 1 1 1 1            | 1 1 1 1 1 1 | 0 9 2 7 6 0 24                                                                                                                                                                |
| Tierney (2005)         | rct (cluster) | 1 1 1 1 1 1 0 0 1 0                                                                                                                                                                                                                                                                                                                                                                                                                                                                                                                                                                                                                                                                                                                                                                                                                                                                                                                                                                                                                                                                                                                                                                                                                                                                                                                                                                                                                                                                                       | 1 0 1    | 1 1 1 1 1 1 1            | 1 1 1 1 1 1 | 0 7 2 7 6 0 22                                                                                                                                                                |
| Winston (2007)         | rct           | 1 1 1 1 2 1 1 0 1 1                                                                                                                                                                                                                                                                                                                                                                                                                                                                                                                                                                                                                                                                                                                                                                                                                                                                                                                                                                                                                                                                                                                                                                                                                                                                                                                                                                                                                                                                                       | 1 1 1    | 0 1 1 1 1 1 1            | 1 1 1 1 1 1 | 0 10 3 6 6 0 25                                                                                                                                                               |

| Study ID               | Design        | Adequate sequence generation | Allocation concealment | Blinding (or accurate outcome assessment) | Incomplete outcome data addressed | Free of other bias (i.e.: contamination effects) | Free of ROB issues |
|------------------------|---------------|------------------------------|------------------------|-------------------------------------------|-----------------------------------|--------------------------------------------------|--------------------|
| Beck (1997)            | cct           | 1                            | 0                      | 1                                         | 0                                 | 0                                                | 0                  |
| Berg (2005)            | rct           | NRS                          | NRS                    | 1                                         | 1                                 | 0                                                | NRS                |
| Garcia-Aymerich (2007) | rct           | 1                            | 1                      | 1                                         | 0                                 | 0                                                | 0                  |
| Herman (1994)          | rct (cluster) | 1                            | 1                      | 1                                         | 1                                 | 1                                                | 1                  |
| Hermiz (2002)          | cct           | 1                            | 0                      | 0                                         | 1                                 | 0                                                | 0                  |
| Johnson (2005)         | rct           | NRS                          | NRS                    | 1                                         | 1                                 | 0                                                | NRS                |
| Kim (1999)             | rct (cluster) | 1                            | 1                      | 0                                         | 1                                 | 1                                                | 0                  |
| Morrissey (1995)       | rct           | 1                            | 1                      | 1                                         | 1                                 | 0                                                | 0                  |
| Shah (2006)            | pcs (cluster) | NRS                          | NRS                    | 0                                         | 0                                 | 1                                                | NRS                |
| Tierney (2003)         | rct (cluster) | 1                            | 1                      | 1                                         | 1                                 | 1                                                | 1                  |
| Tierney (2005)         | rct (cluster) | 1                            | 1                      | 1                                         | 1                                 | 1                                                | 1                  |
| Winston (2007)         | rct           | 1                            | 1                      | 1                                         | 1                                 | 0                                                | 0                  |

Exhibit B.2.11. Pneumococcal vaccinations – Visit structure change

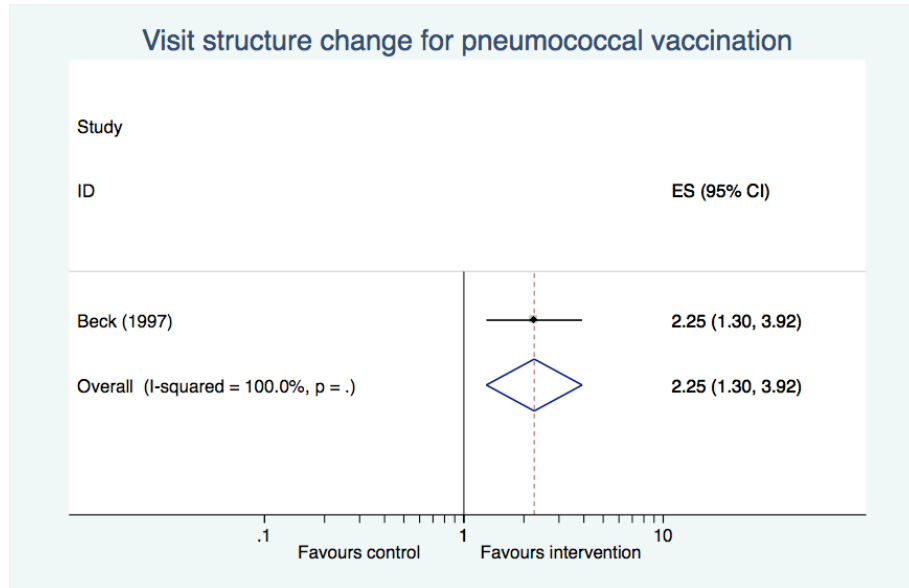

| Study ID    | Design | Reporting           | validity | Internal validity - bias | confounding | Summary scores |
|-------------|--------|---------------------|----------|--------------------------|-------------|----------------|
| Beck (1997) | cct    | 1 1 1 1 2 1 1 0 0 1 | 1 0 1    | 0 1 1 1 1 1 1            | 1 1 1 0 1 0 | 9 2 6 4 0      |

| Study ID    | Design | Adequate sequence generation | Allocation concealment | Blinding (or accurate outcome assessment) | Incomplete outcome data addressed | Free of other bias (i.e.: contamination effects) | Free of ROB issues |
|-------------|--------|------------------------------|------------------------|-------------------------------------------|-----------------------------------|--------------------------------------------------|--------------------|
| Beck (1997) | cct    | 1                            | 0                      | 1                                         | 0                                 | 0                                                | 0                  |
